# Supplementary material
Source: publisher figshare collection journal article supplement (https://acs.figshare.com/ndownloader/files/4666429)

# "The Dioxanone Approach to (2*S*, 3*R*)-2-*C*-Methylethritol 4-Phosphate and 2,4-Cyclodiphosphate, and Various MEP Analogues."

By Chandraiah Lagiseti, Marek Urbansky, and Robert M. Coates\*

## SUPPORTING INFORMATION

|                                                                                                                                                                                                                                                                                                          |         |
|----------------------------------------------------------------------------------------------------------------------------------------------------------------------------------------------------------------------------------------------------------------------------------------------------------|---------|
| General Aspects.....                                                                                                                                                                                                                                                                                     | S2      |
| Experimental procedures, characterization data, and references for compounds: <b>10</b> , <b>11</b> , <b>24</b> , <b>25</b> , <b>26</b> ,<br><b>15</b> (from <b>26</b> ), <b>28</b> , <b>31</b> , <b>32</b> , <b>33</b> , <b>35</b> , tosylate intermediate, <b>38</b> , <b>39</b> , and <b>40</b> ..... | S3-S14  |
| Reproductions of <sup>1</sup> H, <sup>13</sup> C, and <sup>31</sup> P NMR Spectra of Selected Compounds.....                                                                                                                                                                                             | S15-S66 |

**Note:** Some NMR spectra are available in the Supporting Information accompanying the preliminary communication: Urbansky, M.; Davis, C. E.; Surjan, J. D.; Coates, R. M. *Org. Lett.* **2004**, *4*, 135-138

## General Aspects:

Reactions carried out under anhydrous conditions were performed under N<sub>2</sub> using oven-dried glassware unless specified otherwise. Et<sub>2</sub>O, THF and benzene were distilled from sodium / benzophenone ketyl before use. Pentane, toluene, CH<sub>2</sub>Cl<sub>2</sub>, and Et<sub>3</sub>N were distilled from calcium hydride before use. Dibenzyl phosphorochloridate was prepared as described by Buck and Reese.<sup>1</sup> Dibenzyl *N, N*-diisopropylphosphoramidite was prepared from PCl<sub>3</sub> using literature procedures.<sup>2</sup> Solvents used for chromatography were distilled prior to use. All other reagents and solvents used were reagent grade. Flash column chromatography was performed according to Still's procedure using 100-700 times excess 32-64 μm grade silica gel.<sup>3</sup> TLC analysis was performed using glass TLC plates (0.25 mm 60 F-254 silica gel). Visualization of the developed plates was accomplished by staining with ethanolic phosphomolybdic acid, ceric ammonium molybdate, or *p*-anisaldehyde followed by heating on a hot plate (ca 120 °C).

The following solvents and reference values (ppm) were used for NMR spectroscopy: CDCl<sub>3</sub> (<sup>1</sup>H: 7.26, <sup>13</sup>C: 77.0), C<sub>6</sub>D<sub>6</sub> (<sup>1</sup>H: 7.16, <sup>13</sup>C: 128.0), C<sub>5</sub>D<sub>5</sub>N (<sup>1</sup>H: 7.19, <sup>13</sup>C: 123.5), THF-*d*<sub>8</sub> (<sup>1</sup>H: 3.58), acetone-*d*<sub>6</sub> (<sup>1</sup>H: 2.05, <sup>13</sup>C: 206.0), CD<sub>3</sub>OH (<sup>1</sup>H: 3.31, <sup>13</sup>C: 49.0), D<sub>2</sub>O (<sup>1</sup>H: 4.80). <sup>13</sup>C and <sup>31</sup>P NMR spectral data taken in D<sub>2</sub>O were externally referenced to aqueous sodium 2,2-dimethyl-2-silapentane-5-sulfonate (DSS) and 85% phosphoric acid (0.00 ppm), respectively. The abbreviation "app" (apparent) in <sup>1</sup>H NMR data sets refers to the appearance of the multiplet observed, and the coupling constants deduced in these cases were obtained by first-order coupling analysis. Samples for FT IR analysis were prepared as neat films on NaCl plates, and the data are reported in wave-numbers (cm<sup>-1</sup>). Melting points were determined in open capillary tubes and are uncorrected. Optical rotations were measured using a digital polarimeter with a sodium lamp as MeOH, CHCl<sub>3</sub>, water, or pyridine solutions in 0.5- or 1-dm cells at 24 °C unless noted otherwise. The University of Illinois Mass Spectroscopy Laboratories collected mass spectral data.

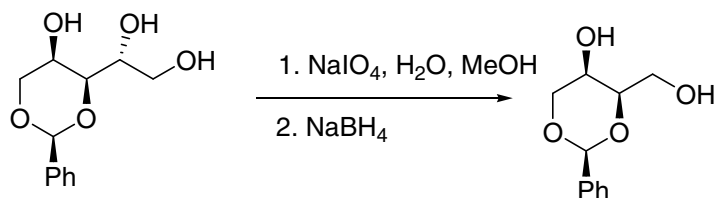

### 1, 3-Benzylidene-D-threitol (**10**).

The oxidative cleavage procedure reported by Ueno et al.<sup>4</sup> was followed with some modifications. A solution of 1, 3-benzylidene D-arabitol (**9**)<sup>5</sup> (3.0 g, 12.4 mmol) in methanol (70 mL) was stirred and cooled at 0 °C as a cold aqueous solution (30 mL) of NaIO<sub>4</sub> (2.9 g, 13.7 mmol) was added dropwise over 10 min. The resulting white suspension was allowed to stir for 20 min, at which time the TLC (*R<sub>f</sub>* 0.7, 10:90 EtOH-CH<sub>2</sub>Cl<sub>2</sub>) indicated the reaction was completed. The precipitated solids were filtered and washed with methanol (15 mL). The filtrate containing aldehyde was stirred as NaBH<sub>4</sub> (0.47 g, 12.4 mmol) in water (3 mL) at 0 °C was added. The resulting milky suspension was stirred for 1 h at 0 °C after which methanol was removed under reduced pressure, and satd aqueous NH<sub>4</sub>Cl (100 mL) was added. The product was extracted with CH<sub>2</sub>Cl<sub>2</sub> (5x100 mL), and the combined extracts were dried over MgSO<sub>4</sub>. Evaporation of the solvent under reduced pressure gave a crude white solid, which was crystallized with 7:3 CH<sub>2</sub>Cl<sub>2</sub>-acetone (10 mL) to give pure diol **10** (1.25 g) as a white crystalline solid. Concentration of the filtrate and purification by chromatography (65:35 acetone-CH<sub>2</sub>Cl<sub>2</sub>) gave another 670 mg of pure diol as a white solid; total yield, 1.95 g (76%); mp 130-132 °C [lit<sup>6</sup> mp 123 °C]; [ $\alpha$ ]<sub>D</sub><sup>25</sup> -3.1° (*c* = 1.00, MeOH) [lit<sup>6</sup> [ $\alpha$ ]<sub>D</sub><sup>23</sup> - 6.0]; TLC *R<sub>f</sub>* 0.5 (10:90 ethanol:CH<sub>2</sub>Cl<sub>2</sub>); <sup>1</sup>H NMR (400 MHz, CD<sub>3</sub>OD)  $\delta$  3.62 (q, 1H, *J* = 1.5 Hz) 3.70-3.79 (m, 2H), 4.00 (m, 1H), 4.12 (t, 2H, *J* = 1.5 Hz), 5.60 (s, 1H), 7.33 (m, 3H), 7.55 (m, 2H); <sup>13</sup>C NMR (100 MHz, CD<sub>3</sub>OD)  $\delta$  63.1, 64.9, 73.7, 81.5, 102.8, 127.6, 129.0, 129.8, 139.9. The <sup>1</sup>H NMR (CD<sub>3</sub>OH) data correlate well with the literature values.<sup>6</sup>

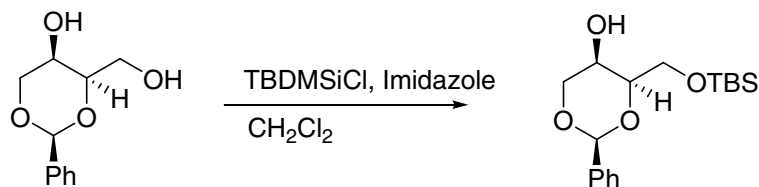

**1, 3-Benzylidene-D-threitol, 4-(*t*-Butyldimethylsilyl) Ether (11).**

A solution of 1, 3-benzylidene threitol 10 (2.00 g, 9.5 mmol) and imidazole (710 mg, 10.4 mmol) in dry  $\text{CH}_2\text{Cl}_2$  (170 mL) was stirred and cooled at 0 °C as *t*-butyldimethylchlorosilane (1.8 g, 11.9 mmol) in  $\text{CH}_2\text{Cl}_2$  (10 mL) was added dropwise over 5 min. The resulting milky suspension was stirred for 8 h at ambient temp. Ethanolamine (1.0 mL) was added to scavenge the excess TBDMSCl, and the suspension was allowed to stir for an additional 30 min. Water (150 mL) was added, and the product was extracted with  $\text{CH}_2\text{Cl}_2$  (4x100 mL). The combined organic layers were washed with brine (1x150 mL) and dried over  $\text{MgSO}_4$ . Evaporation of the solvent under reduced pressure, and purification of the residue by flash chromatography (20:80 acetone-hexane and 50:50 acetone-hexane) gave 2.70 g (92%) of the mono-silyl ether 11 as a colorless solid: mp 43-44 °C; TLC  $R_f$  0.48 (30:70, acetone:hexane);  $[\alpha]_D^{25}$   $-4.46^\circ$  ( $c = 1.0$ , MeOH);  $^1\text{H}$  NMR (400 MHz,  $\text{CDCl}_3$ )  $\delta$  0.08 (s, 3H), 0.09 (s, 3H), 0.90 (s, 9H), 2.84 (d, 1H,  $J = 10.3$  Hz), 3.73 (app d, 1H,  $J = 10.2$  Hz), 3.79 (app dd, 1H,  $J = 10.0, 5.1$  Hz), 3.90 (app dd, 1H,  $J = 10.0, 6.8$  Hz), 3.97 (m, 1H), 4.07 (dd, 1H,  $J = 11.9, 1.5$  Hz), 4.25 (dd, 1H,  $J = 11.9, 1.9$  Hz), 5.59 (s, 1H), 7.33-7.40 (m, 3H), 7.50 (m, 2H);  $^{13}\text{C}$  NMR (100 MHz,  $\text{CDCl}_3$ )  $\delta$  -5.3, -5.2, 18.4, 26.0, 62.6, 63.9, 72.9, 79.9, 101.6, 126.1, 128.4, 129.2, 137.9; IR (neat film)  $\nu$  3446, 3019, 2955, 2930, 1857, 1521, 1406, 1215  $\text{cm}^{-1}$ ; HRMS (FAB)  $m/z$  Calcd for  $\text{C}_{17}\text{H}_{28}\text{O}_4\text{Si}$  ( $\text{M}+1$ ) $^+$ : 325.1836, found 325.1835.

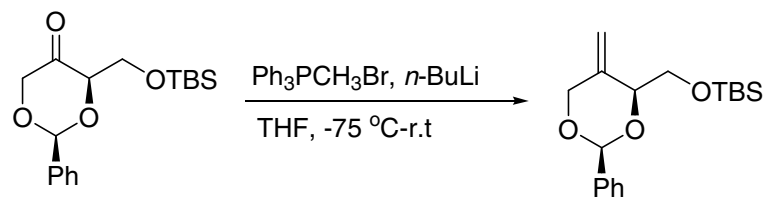

**(2*S*, 4*S*)-4-(*t*-Butyldimethylsilyloxymethyl)-5-methylene-2-phenyl-1, 3-dioxane (**24**).**

The Wittig reaction was carried out according to the procedure of Acton et al.<sup>7</sup> with some modifications. A suspension of methyltriphenylphosphonium bromide (1.13 g, 3.16 mmol) in dry THF (10 mL) was stirred and cooled at  $-75\text{ }^{\circ}\text{C}$  as 1.97 mL of *n*-BuLi (3.16 mmol, 1.6 *M* in hexane) was added dropwise over 3 min. The resulting solution gradually turned yellow. After being stirred for 15 min, the solution was warmed to room temp and stirred an additional 30 min. The solution was again cooled to  $-75\text{ }^{\circ}\text{C}$ , keto silyl ether **12** (340 mg, 1.05 mmol) in THF (1 mL) was added dropwise, and the solution was warmed to room temp. After 6 h the reaction was quenched with cold water (5 mL), and the product was extracted with ether (4x15 mL). The combined extracts were washed with brine (15 mL) and dried over  $\text{MgSO}_4$ . Evaporation of the solvent and purification by silica-gel chromatography (8:92 ethyl acetate:hexane) provided 270 mg (82%) of olefin **24** as a liquid: TLC  $R_f$  0.75 (20% EtOAc in hexane):  $[\alpha]_{\text{D}}^{25} -30.8^{\circ}$  ( $c = 0.5$ , MeOH);  $^1\text{H}$  NMR (500 MHz, benzene- $d_6$ )  $\delta$  0.00 (s, 6H), 0.91 (s, 9H), 3.87 ( $\nu_{\text{B}}$  ABX, 1H,  $J_{\text{AB}} = 12.0\text{ Hz}$ ,  $J_{\text{BX}} = 3.7\text{ Hz}$ ), 3.95 ( $\nu_{\text{A}}$  ABX, 1H,  $J_{\text{AB}} = 12.0\text{ Hz}$ ,  $J_{\text{AX}} = 5.2\text{ Hz}$ ), 4.05 and 4.19 (ABdd, 2H,  $J = 12.3\text{ Hz}$ ), 4.24 (app t,  $\nu_{\text{X}}$  ABX, 1H,  $J_{\text{app}} = 5.7\text{ Hz}$ ), 4.68 (s, 1H), 4.97(s, 1H), 5.47 (s, 1H), 7.06 (t, 1H,  $J = 7.5\text{ Hz}$ ), 7.14 (t, 2H,  $J = 7.2\text{ Hz}$ ), 7.61 (d, 2H,  $J = 7.5\text{ Hz}$ );  $^{13}\text{C}$  NMR (125 MHz, benzene- $d_6$ )  $\delta$   $-5.4$ ,  $-5.3$ ,  $18.2$ ,  $25.8$ ,  $64.0$ ,  $71.5$ ,  $78.4$ ,  $101.2$ ,  $109.2$ ,  $126.7$ ,  $128.1$ ,  $128.7$ ,  $139.0$ ,  $141.0$ ; IR (neat film)  $\nu$  3068, 2955, 2929, 2884, 2856, 1472, 1461, 1403, 1253  $\text{cm}^{-1}$ ; HRMS (FAB)  $m/z$  Calcd for  $\text{C}_{18}\text{H}_{28}\text{O}_3\text{Si}$  ( $\text{M}^+$ ): 320.1808, found 320.1762.

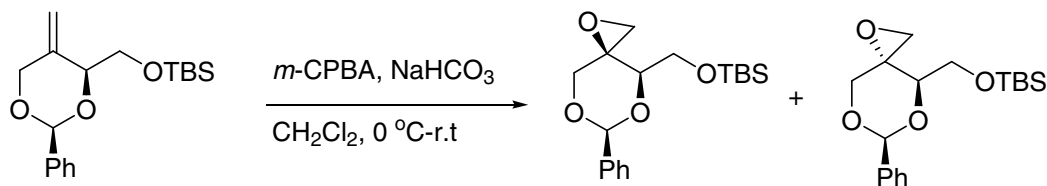

(2*S*, 4*S*, 5*R*)-*cis*, *cis*- and (2*S*, 4*S*, 5*S*)-*cis*, *trans*-4-(*t*-Butyldimethylsilyloxymethyl)-5, 5-oxymethylene-2-phenyl-1, 3-dioxane (**25** and **26**).

The epoxidation was carried out according to a procedure described by Schneider and Séquin<sup>8</sup> with modifications. A suspension of NaHCO<sub>3</sub> (0.91 g, 10.9 mmol) in a solution of olefin **24** (0.7 g, 2.1 mmol) in CH<sub>2</sub>Cl<sub>2</sub> (20 mL) was stirred and cooled at 0 °C as 2.0 equiv of *m*-chloroperoxybenzoic acid (900 mg, 70%, 4.2 mmol) was added. After 4 h, another 2.0 equiv of peracid (0.9 g, 70%, 4.2 mmol) was added. After 12 h, satd aq Na<sub>2</sub>SO<sub>3</sub> (1.0 mL) and satd aq NaHCO<sub>3</sub> (30 mL) were added, and the product was extracted with CH<sub>2</sub>Cl<sub>2</sub> (3 x 40 mL). The combined extracts were washed with satd aq NaHCO<sub>3</sub> (30 mL) and brine (30 mL), and dried over MgSO<sub>4</sub>. Evaporation of the solvent under reduced pressure gave the crude product, which was a 2:1 mixture of *cis*,*cis* and *cis*,*trans* epoxides according to <sup>1</sup>H NMR analysis. Purification by flash chromatography (10% ethyl acetate-hexane) yielded 350 mg (48%) of the *cis*,*cis* epoxide **25** and 180 mg (25%) of the *cis*,*trans* epoxide **26** as liquids. Data for the *cis*,*cis* epoxide **25**: TLC *R<sub>f</sub>* 0.4 (20:80. EtOAc: hexane); [α]<sub>D</sub><sup>25</sup> +10.1° (*c* = 1.00, MeOH); <sup>1</sup>H NMR (400 MHz, benzene-*d*<sub>6</sub>) δ -0.02 (s, 3H), -0.01 (s, 3H), 0.91 (s, 9H), 1.96 (d, 1H, *J* = 4.7 Hz), 2.85 (d, 1H, *J* = 4.7 Hz), 3.41 (d, 1H, *J* = 12.5 Hz), 3.70 (v<sub>B</sub> ABX, 1H, *J*<sub>AB</sub> = 10.4 Hz, *J*<sub>BX</sub> = 4.9 Hz), 3.82 (v<sub>A</sub> ABX, 1H, *J*<sub>AB</sub> = 10.0 Hz, *J*<sub>AX</sub> = 6.9 Hz), 3.85 (d, 1H, *J* = 12.5 Hz), 4.21 (v<sub>X</sub> ABX, 1H, *J*<sub>AX</sub> = 6.9 Hz, *J*<sub>BX</sub> = 4.9 Hz), 5.4 (s, 1H), 7.05-7.09 (m, 1H), 7.12-7.16 (m, 2H), 7.60-7.63 (m, 2H); <sup>13</sup>C NMR (100 MHz, CDCl<sub>3</sub>) δ -5.7, -5.5, 18.2, 25.8, 46.5, 54.2, 61.6, 72.3, 78.1, 101.5, 126.7, 128.1, 128.9, 138.6; IR (neat film) ν 2954, 2929, 2885, 2856, 1471, 1398, 1255 cm<sup>-1</sup>; HRMS (FAB) *m/z*

Calcd for  $C_{18}H_{28}O_4Si$  (M-H) $^+$ : 335.1679, found 335.1679. Data for the cis,trans epoxide **26**: TLC  $R_f$  0.6 (20:80, EtOAc:hexane);  $[\alpha]_D^{25} +49.4^\circ$  ( $c = 1.1$ , MeOH);  $^1H$  NMR (500 MHz, benzene- $d_6$ )  $\delta$  0.05 (s, 3H), 0.06 (s, 3H), 0.96 (s, 9H), 2.21 (dd, 1H,  $J = 4.6, 1.2$  Hz), 2.71 (dd, 1H,  $J = 1.7, 4.5$  Hz), 3.44 (d, 1H,  $J = 11.3$  Hz), 3.62 (d, 1H,  $J = 1.5$  Hz), 3.63 (s, 1H), 3.84 (dd, 1H,  $J = 2.0, 11.3$  Hz), 4.05 (app t, 1H,  $J_{app} = 3.8$  Hz), 5.41 (s, 1H), 7.08 (m, 1H), 7.17 (m, 2H), 7.64 (m, 2H);  $^{13}C$  NMR (125 MHz,  $CDCl_3$ )  $\delta$  -5.3, -5.2, 18.3, 25.8, 51.7, 52.0, 61.3, 71.2, 79.6, 101.2, 126.6, 128.2, 128.8, 138.4; IR (neat film)  $\nu$  2953, 2929, 2856, 1471, 1461, 1461, 1349, 1253, 1105, 1033, 972  $cm^{-1}$ ; HRMS (FAB)  $m/z$  Calcd for  $C_{18}H_{28}O_4Si$  (M+H) $^+$ : 337.1836, found 337.1835.

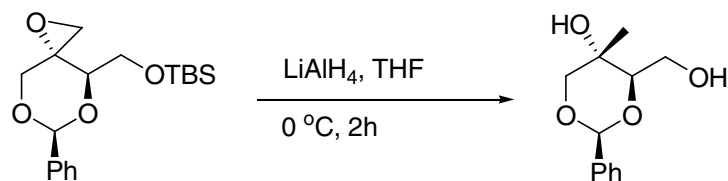

### 1, 3-Benzylidene-2-*C*-methylerythritol (**15**).

The  $LiAlH_4$  reduction-desilation of cis,trans epoxide **26** was carried out as described in the Experimental Section for the cis, cis epoxide (**25**). The weights of the starting epoxide and reagent were as follows: epoxide (40 mg 0.1 mmol) and  $LiAlH_4$  (4.5 mg, 0.1 mmol). After work-up, the crude product was purified by silica-gel chromatography (60% EtOAc in hexane) to give 24 mg (90 %) diol **15** as white solid. The physical and NMR data were in agreement with those reported in the Experimental Section for 1, 3-benzylidene 2-*C*-methylerythritol (**15**).

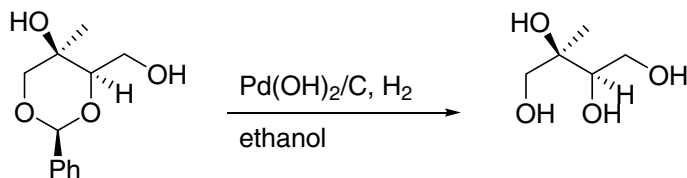

### 2-C-Methyl-D-threitol (**28**).

To a solution of diol **27** (34 mg, 0.15 mmol) in ethanol (3 mL) containing HCO<sub>2</sub>H (1 drop) was added 20% Pd(OH)<sub>2</sub>/C (15 mg). The suspension was allowed to stir under an H<sub>2</sub> atmosphere for 12 h. The mixture was diluted with MeOH (5 mL) and filtered through celite. Concentration of the filtrate at reduced pressure afforded 20 mg (98%) of 2-C-methylthreitol (**28**, 20 mg, 98%) as a colorless oil:  $[\alpha]_D^{25} +9.8^\circ$  ( $c = 1.00$ , MeOH);  $[\text{lit}^9 [\alpha]_D^{25} +7.3^\circ$  ( $c = 0.8$ , MeOH); <sup>1</sup>H NMR (500 MHz, D<sub>2</sub>O)  $\delta$  1.09 (s, 3H), 3.47 and 3.53 (ABdd, 2H,  $J_{AB} = 11.6$  Hz), 3.50 (bd, 1H,  $J = 11.6$  Hz), 3.63 (dd, 1H,  $J = 8.5, 2.8$  Hz), 3.75 (dd, 1H,  $J = 11.8, 2.8$  Hz); <sup>13</sup>C NMR (125 MHz, CDCl<sub>3</sub>)  $\delta$  19.2, 61.9, 66.2, 74.2, 75.2. The spectral data agree with the reported values.<sup>9</sup>

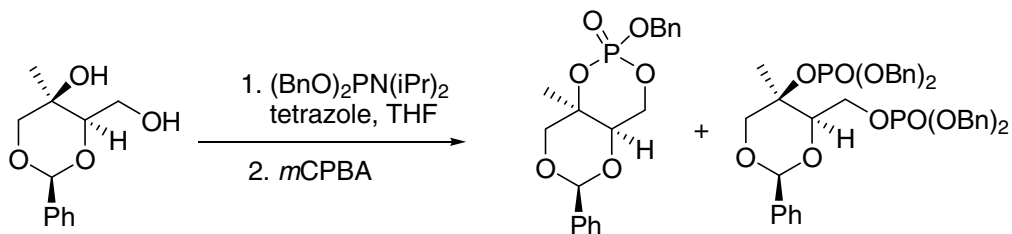

### 1, 3-Benzylidene-2-C-methyl-D-threitol 2, 4-Cyclophosphate, Benzyl Ester (**31**) and 1, 3-Benzylidene-2-C-methyl-D-threitol 2, 4-diphosphate, Tetrabenzyl Ester (**32**).

The phosphorylation procedure was based on that described by Yu and Fraser-Reid<sup>10</sup> and on the procedure described in the Experimental Section for diol **15**. A solution of dibenzyl *N,N*-diisopropylphosphoramidite<sup>2</sup> (230 mg, 0.66 mmol) and tetrazole (70 mg, 1.0 mmol) in CH<sub>3</sub>CN (2.0 mL) was allowed to stir for 30 min at room temp. A solution of diol **27** (50 mg, 0.22 mmol) in CH<sub>3</sub>CN (1.5



mL) was added dropwise. After 5 h, the reaction mixture was cooled to 0 °C and *m*-chloroperoxybenzoic acid (solid, 220 mg, 2.0 mmol, 77%) was added. The cooling bath was removed, and the reaction mixture was allowed to stir at room temp. After 1h, the mixture was diluted with Et<sub>2</sub>O (40 mL). The ethereal layer was washed with 10% Na<sub>2</sub>S<sub>2</sub>O<sub>5</sub> (2x10 mL), satd aq NaHCO<sub>3</sub> (10 mL), and brine (10 mL); dried (MgSO<sub>4</sub>); and evaporated to give the crude product as a white solid. Purification by flash chromatography (60% and 75% EtOAc:hexane) gave 25 mg (35%) of cyclic phosphate **31** as white solid and 15 mg (10%) bis(dibenzyl) diphosphate **32** as a colorless oil. Data for **31**: mp 181-182 °C TLC *R<sub>f</sub>* 0.5 (75:25 EtOAc:hexane); [ $\alpha$ ]<sub>D</sub><sup>25</sup> -57.0° (*c* = 0.61, CHCl<sub>3</sub>); <sup>1</sup>H NMR (500 MHz, CDCl<sub>3</sub>),  $\delta$  1.35 (s, 3H), 3.72-3.76 (m, 2H), 4.11 (d, 1H, *J* = 12.5 Hz), 4.33 (app dd, 1H, *J*<sub>app</sub> = 12.5, 23.5 Hz), 4.49 (d, 1H, *J* = 12.5 Hz), 5.15 (d, 2H, *J* = 8.0 Hz), 5.54 (s, 1H), 7.34-7.40 (m, 8H), 7.55 (m, 2H); <sup>13</sup>C NMR (125 MHz, CDCl<sub>3</sub>)  $\delta$  20.0, 67.3 (d, *J*<sub>cp</sub> = 5.4 Hz), 69.4 (d, *J*<sub>cp</sub> = 5.4 Hz), 73.6 (d, *J*<sub>cp</sub> = 7.2 Hz), 74.7 (d, *J*<sub>cp</sub> = 9.1 Hz), 78.2 (d, *J*<sub>cp</sub> = 8.1 Hz), 101.6, 126.8, 128.4, 128.6, 128.9, 129.7, 136.1 (d, *J*<sub>cp</sub> = 7.4 Hz), 137.1; HRMS (FAB) *m/z* Calcd for C<sub>19</sub>H<sub>22</sub>O<sub>6</sub>P (M+1)<sup>+</sup> 377.1154, found 377.1155. Data for the bis(dibenzyl) diphosphate **32**: TLC *R<sub>f</sub>* 0.31 (75:35 EtOAc-hexane); [ $\alpha$ ]<sub>D</sub><sup>25</sup> +12.9° (*c* = 1.38, CHCl<sub>3</sub>); <sup>1</sup>H NMR (500 MHz, acetone *d*<sub>6</sub>),  $\delta$  1.47 (s, 3H), 3.94 and 4.77 (ABdd, 2H, *J* = 12.7 Hz), 4.14-4.24 (m, 2H), 4.32-4.37 (m, 1H), 5.02-5.13 (m, 8H), 5.73 (s, 1H), 7.27-7.38 (m, 21H), 7.40 (m, 2H), 7.50 (m, 2H); <sup>13</sup>C NMR (125 MHz, acetone-*d*<sub>6</sub>)  $\delta$  18.7, 66.1 (d, *J*<sub>cp</sub> = 4.9 Hz), 68.8 (d, *J*<sub>cp</sub> = 6.2 Hz), 68.9 (d, *J*<sub>cp</sub> = 4.9 Hz), 69.0 (d, *J*<sub>cp</sub> = 6.2 Hz), 72.5, 77.4 (d, *J*<sub>cp</sub> = 4.9 Hz), 81.9 (d, *J*<sub>cp</sub> = 7.0 Hz), 82.0 (d, *J*<sub>cp</sub> = 7.0 Hz), 101.0, 126.5, 127.9, 128.0, 128.1, 128.1, 128.2, 128.3, 128.5, 128.5, 128.6, 128.6, 128.6, 128.6, 128.7, 128.7, 128.9, 136.6, 138.6, 138.7, 138.4; HRMS (FAB) *m/z* Calcd for C<sub>40</sub>H<sub>43</sub>O<sub>10</sub>P<sub>2</sub> (M+1)<sup>+</sup> 745.2331, found 745.2332.

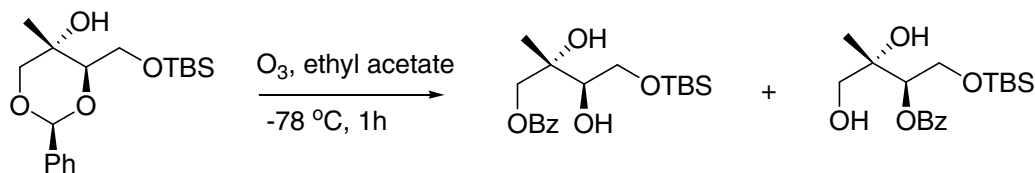

**(2*R*, 3*S*)-3-Benzoyloxy-4-(*t*-butyldimethylsilyloxy)-2-methylbutan-1, 2-diol (34) and (2*R*, 3*S*)-1-Benzoyloxy-4-(*t*-butyldimethylsilyloxy)-2-methylbutan-2, 3-diol (35)**

The ozonolysis was carried out according to a procedure described by Deslongchamps et al.<sup>11</sup> A solution of silyl ether (250 mg, 0.74 mmol) in ethyl acetate (8.0 mL) stirred and cooled at  $-75^{\circ}\text{C}$  as an ozone-oxygen mixture was bubbled through the solution for 1.5 h. The residual ozone was removed by flushing with nitrogen. Evaporation of the solvent under reduced pressure gave the crude product, as a 4:1 mixture of primary and secondary alcohol isomers according to  $^1\text{H}$  NMR analysis. Purification by silica-gel column chromatography (20% ethyl acetate/hexane) afforded 40 mg (20%) of the less polar secondary alcohol **35** and 195 mg (75%) of the more polar primary alcohol **34** as liquids. Physical data for **35**: TLC  $R_f$  0.35 (20:80 ethyl acetate: hexane);  $[\alpha]_{\text{D}}^{25} +7.2^{\circ}$  ( $c = 1.9$ ,  $\text{CHCl}_3$ );  $^1\text{H}$  NMR (500 MHz,  $\text{CDCl}_3$ )  $\delta$  0.09 (s, 6H), 0.90 (s, 9H), 1.33 (s, 3H), 3.66 (t, 1H,  $J = 5.0$  Hz), 3.86 (d, 2H,  $J = 5.0$  Hz), 4.27 and 4.33 (ABdd, 2H,  $J_{\text{AB}} = 11.7$  Hz), 7.43 (app t, 2H,  $J_{\text{app}} = 6.5$  Hz), 7.58 (app t, 1H,  $J_{\text{app}} = 7.5$  Hz), 8.05 (app d, 2H,  $J_{\text{app}} = 8.0$  Hz);  $^{13}\text{C}$  NMR (125 MHz,  $\text{CDCl}_3$ )  $\delta$   $-5.3$ ,  $-5.4$ , 18.3, 21.0, 26.0, 64.1, 69.5, 73.1, 73.9, 128.7, 129.9, 133.5, 167.0; IR (neat film)  $\nu$  3473, 2955, 2885, 1722, 1463, 1452, 1274, 1112, 837  $\text{cm}^{-1}$ ; HRMS (FAB)  $m/z$  Calcd for  $\text{C}_{18}\text{H}_{30}\text{O}_5\text{Si}$  ( $\text{M}+1$ )<sup>+</sup> 355.1942, found 355.1940. Physical data for **34**: TLC  $R_f$  0.22 (20:80 ethyl acetate: hexane);  $[\alpha]_{\text{D}}^{25} +6.5^{\circ}$  ( $c = 1.6$ ,  $\text{CHCl}_3$ );  $^1\text{H}$  NMR (500 MHz,  $\text{CDCl}_3$ )  $\delta$  0.07 (s, 6H), 0.86 (s, 9H), 1.22 (s, 3H), 3.39 and 3.55 (ABdd, 2H,  $J_{\text{AB}} = 12.0$  Hz), 4.00 ( $\nu_{\text{B}}$  ABX, 1H,  $J_{\text{AB}} = 11.0$  Hz,  $J_{\text{BX}} = 5.5$  Hz), 4.00 ( $\nu_{\text{A}}$  ABX, 1H,  $J_{\text{AB}} = 11.0$  Hz,  $J_{\text{AX}} = 5.0$  Hz), 5.12 (t, 1H,  $J = 5.5$  Hz), 7.47 (app t, 2H,  $J_{\text{app}} = 7.5$  Hz), 7.59 (app t, 1H,  $J_{\text{app}} = 7.5$  Hz), 8.06

(app d, 2H,  $J_{\text{app}} = 8.0$  Hz);  $^{13}\text{C}$  NMR (125 MHz,  $\text{CDCl}_3$ )  $\delta$  -5.4, -5.3, 18.2, 19.8, 25.8, 61.9, 67.6, 73.8, 75.5, 128.7, 129.7, 130.0, 133.7, 166.9; IR (neat film)  $\nu$  3444, 2954, 2885, 1722, 1471, 1452, 1273, 1125, 837  $\text{cm}^{-1}$ ; HRMS (FAB)  $m/z$  Calcd for  $\text{C}_{18}\text{H}_{30}\text{O}_5\text{Si}$  ( $\text{M}+1$ ) $^+$  355.1942, found 355.1940.

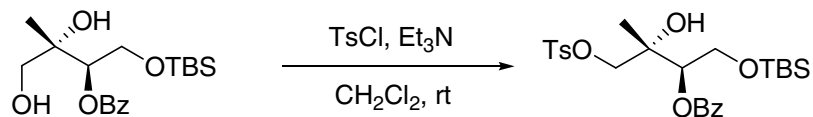

**(2S, 3R)-3-Benzyloxy, 4-(*t*-butyldimethylsilyloxy)-2-hydroxy-2-methylbut-1-yl Tosylate.**

A solution of alcohol **34** (145 mg, 0.41 mmol) and triethylamine (0.6 mL, 4.6 mmol) in methylene chloride (4.0 mL) was stirred and cooled at 0 °C as *p*-toluenesulfonyl chloride (167 mg, 0.88 mmol) and a catalytic amount of 4-dimethylaminopyridine (4.0 mg) were added. The solution was warmed to room temp and stirred for 10 h. Water (5.0 mL) was added, and the product was extracted with methylene chloride (2 x 30 mL). The combined extracts were washed with water (10 mL) and brine (10 mL) and dried over  $\text{MgSO}_4$ . Evaporation of the solvent and purification by flash chromatography (20% ethyl acetate: hexane) gave 180 mg (82%) of the tosylate intermediate as a viscous liquid: TLC  $R_f$  0.75 (30:70 ethyl acetate- hexane);  $[\alpha]_{\text{D}}^{25}$  -18.2° ( $c = 1.00$ ,  $\text{CHCl}_3$ );  $^1\text{H}$  NMR (500 MHz,  $\text{CDCl}_3$ )  $\delta$  0.00 (s, 3H), 0.01 (s, 3H), 0.83 (s, 9H), 1.26 (s, 3H), 2.39 (s, 3H), 3.96 (d, 1H,  $J = 9.6$  Hz), 3.91-4.01 (m, 2H), 4.06 (d, 1H,  $J = 9.6$  Hz), 5.08 (t, 1H,  $J = 4.3$  Hz), 7.28 (d, 2H,  $J = 8.0$  Hz), 7.47 (app t, 2H,  $J_{\text{app}} = 7.5$  Hz), 7.58 (app t, 1H,  $J_{\text{app}} = 7.5$  Hz), 7.76 (d, 2H,  $J = 8.0$  Hz), 8.00 (app d, 2H,  $J_{\text{app}} = 8.0$  Hz);  $^{13}\text{C}$  NMR (125 MHz,  $\text{CDCl}_3$ )  $\delta$  -5.6, -5.4, 18.1, 18.1, 21.5, 21.8, 25.8, 62.5, 73.5, 73.7, 128.2, 128.6, 129.8, 129.9, 130.1, 132.5, 133.5, 145.2, 165.7; IR (neat film)  $\nu$  3472, 2930, 2857, 1722, 1452, 1361, 1270, 1177, 1097, 836  $\text{cm}^{-1}$ ; HRMS (FAB)  $m/z$  Calcd for  $\text{C}_{25}\text{H}_{36}\text{O}_7\text{SSi}$  ( $\text{M}+1$ ) $^+$  509.2027, found 509.2029.

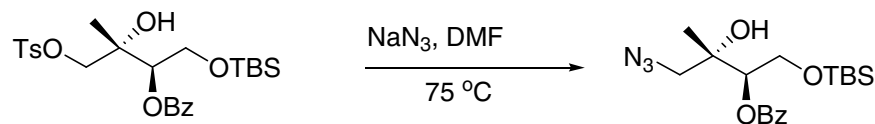

**(2*R*, 3*S*)- 1-Azido-3-benzoyloxy-4-(*t*-butyldimethylsilyloxy)-3-methylbutan-3-ol (**38**)**

A solution of the tosylate (160 mg, 0.32 mmol) and sodium azide (42 mg, 0.64 mmol) in dry DMF (2.0 mL) was stirred and heated at 75 °C. After 2.5 h, suspension was cooled to 0 °C and diluted with ether (10 mL) and water (5.0 L). The aqueous layer was separated and extracted with ether (2 x 15 mL). The combined ethereal layers were washed with water (2 x 5 mL) and brine (5 mL), and dried over MgSO<sub>4</sub>. Concentration and purification by the flash chromatography (10% ethyl acetate: hexane) afforded 93 mg (76%) of azide **38** as a liquid: TLC *R<sub>f</sub>* 0.47 (15:85 ethyl acetate: hexane); [ $\alpha$ ]<sub>D</sub><sup>25</sup> -40.4° (*c* = 1.00, CHCl<sub>3</sub>); <sup>1</sup>H NMR (500 MHz, CDCl<sub>3</sub>)  $\delta$  0.07 (s, 3H), 0.09 (s, 3H), 0.89 (s, 9H), 1.35 (s, 3H), 3.35 (s, 2H), 3.97 (v<sub>B</sub> ABX, 1H, *J*<sub>AB</sub> = 10.0 Hz, *J*<sub>BX</sub> = 6.0 Hz), 4.01 (bs, 1H), 4.09 (v<sub>A</sub> ABX, 1H, *J*<sub>AB</sub> = 10.0 Hz, *J*<sub>AX</sub> = 4.0 Hz), 5.16 (dd, 1H, *J* = 4.0, 5.5 Hz), 7.46 (app t, 2H, *J*<sub>app</sub> = 8.0 Hz), 7.46 (app t, 1H, *J*<sub>app</sub> = 7.5 Hz), 8.05 (app d, 2H, *J*<sub>app</sub> = 8.0 Hz); <sup>13</sup>C NMR (125 MHz, CDCl<sub>3</sub>)  $\delta$  -5.5, -5.4, 18.2, 21.9, 25.8, 58.6, 62.5, 73.5, 73.8, 75.1, 128.7, 129.8, 129.9, 133.6, 165.7; IR (neat film)  $\nu$  3477, 2930, 2858, 2104, 1723, 1452, 1269, 1096, 837 cm<sup>-1</sup>; HRMS (FAB) *m/z* Calcd for C<sub>18</sub>H<sub>29</sub>N<sub>3</sub>O<sub>4</sub>Si (M+1)<sup>+</sup> 380.2006, found 380.2005.

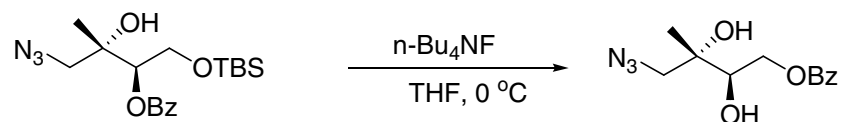

**(2*R*, 3*S*)-1-Azido-4-benzoyloxy-2-methylbutan-2, 3-diol (**39**).**

A solution of silyl-protected azide **38** (60 mg, 0.15 mmol) in dry THF (1.0 mL) was stirred and cooled at 0 °C as  $n\text{Bu}_4\text{NF}$  (0.16 mL, 0.15 mmol, 1 *M* in THF) was added dropwise. After 25 min, water (4 mL) was added, and the product was extracted with ether (3x5 mL). The ethereal extracts were combined and dried over  $\text{MgSO}_4$ . Evaporation of the solvent and purification of the residual oil by flash chromatography (40% EtOAc:hexane) afforded 37 mg (91%) of azido diol **39** as a liquid: TLC  $R_f$  0.2 (30:70 EtOAc: hexane);  $[\alpha]_D^{25} +13.0^\circ$  ( $c = 1.00$ ,  $\text{CHCl}_3$ );  $^1\text{H}$  NMR (500 MHz,  $\text{CDCl}_3$ )  $\delta$  1.28 (s, 3H), 2.49 (s, 1H), 2.93 (bd, 1H,  $J = 3.5$  Hz), 3.34 (d, 1H,  $J = 12.4$  Hz), 3.64 (d, 1H,  $J = 12.0$  Hz), 3.94 (bd, 1H,  $J = 7.4$  Hz), 4.41 (dd, 1H,  $J = 7.5, 12.0$  Hz), 4.61 (dd, 1H,  $J = 2.5, 12.0$  Hz), 7.46 (m, 2H), 7.58 (m, 1H), 8.05 (m, 2H);  $^{13}\text{C}$  NMR (125 MHz,  $\text{CDCl}_3$ )  $\delta$  20.7, 58.2, 66.4, 73.7, 74.3, 128.7, 129.7, 129.9, 133.6, 165.7; IR (neat film)  $\nu$  3448, 2932, 2106, 1704, 1602, 1451, 1278, 1122, 1026  $\text{cm}^{-1}$ ; HRMS (FAB)  $m/z$  Calcd for  $\text{C}_{12}\text{H}_{15}\text{N}_3\text{O}_4$  ( $\text{M}+1$ ) $^+$  266.1149; found 266.1141.

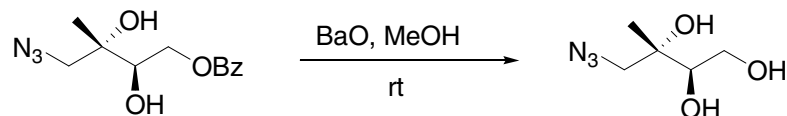

**(2*R*, 3*S*)-4-Azido-3-methylbutane-1, 2, 3-triol (**40**).**

A solution of azido diol **39** (25 mg, 0.09 mmol) and BaO (29 mg, 0.18 mmol) in  $\text{MeOH}^{12}$  was stirred for 40 min at room temp with TLC monitoring. Evaporation of the MeOH and purification of the residue by silica-gel chromatography (80% ethyl acetate/hexane) gave 12 mg (92 %) of azido triol **40** as a viscous oil: TLC  $R_f$  0.17 (80:20 EtOAc:hexane);  $[\alpha]_D^{25} +13.8^\circ$  ( $c = 0.78$ ,

MeOH);  $^1\text{H}$  NMR (400 MHz,  $\text{CDCl}_3$ )  $\delta$  1.25 (s, 3H), 3.32 (d, 1H,  $J = 12.0$  Hz), 3.53 (d, 1H,  $J = 12.3$  Hz), 3.63 (dd, 1H,  $J = 4.0, 6.2$  Hz), 3.72 (dd, 1H,  $J = 6.0, 11.2$  Hz), 3.83 (dd, 1H,  $J = 3.7, 11.2$  Hz);  $^{13}\text{C}$  NMR (100 MHz,  $\text{CDCl}_3$ )  $\delta$  21.7, 58.1, 62.9, 74.3, 75.0; IR (neat film)  $\nu$  3391, 2932, 2106, 1289, 1088, 1024  $\text{cm}^{-1}$ ; HRMS (FAB)  $m/z$  Calcd for  $\text{C}_5\text{H}_{11}\text{N}_3\text{O}_3$  ( $\text{M}+1$ ) $^+$  162.0881, found 162.0879.

## References

1. Buck, I. M.; Reese, C. B. *J. Chem. Soc., Perkin Trans. I* **1990**, 2937-2942.
2. (a) Tanaka, T.; Tamatsukuri, S.; Ikehara, M. *Tetrahedron Lett.* **1986**, 27, 199-202. (b) Dreef, C. E.; Tulnman, R. J.; Lefeber, A. W. M.; Elle, C. J. J.; van der Marel, G. A.; van Boom, J. H. *Tetrahedron* **1991**, 47, 4709-4722.
3. Still, W. C.; Kahn, M.; Mitra, A. *J. Org. Chem.* **1978**, 43, 2923-2925.
4. Ueno, Y.; Tadano, K.; Ogawa, S.; McLaughlin, J. L.; Alkofahi, A. *Bull. Chem. Soc. Jpn.* **1989**, 62, 2328-2337.
5. Haskins, W. T.; Hann, R. M.; Hudson, C. S. *J. Am. Chem. Soc.* **1943**, 65, 1663-1667.
6. Lehmann, J.; Wagenknecht, H.-A. *Carbohydr. Res.* **1995**, 276, 215-218.
7. Acton, E. M.; Goerner, R. N.; Uh, H. S.; Ryan, K. J.; Henry, D. W.; Cass, C. E.; LePage, G. A. *J. Med. Chem.*, **1979**, 22, 518-525.
8. Schneider, A.; Séquin, U. *Tetrahedron* **1985**, 41, 949-953.
9. Fontana, A.; Messina, R.; Spinella, A.; Cimino, G.; *Tetrahedron Lett.* **2000**, 41, 7559-7562.
10. Yu, K.-L.; Fraser-Reid, B. *Tetrahedron Lett.* **1988**, 29, 979-982.
11. Deslongchamps, P.; Moreu, C.; Fréhel, D.; Chênevert, R. *Can. J. Chem.* **1975**, 53, 1204-1210.
12. Hsu, D.-S.; Matsumoto, T.; Suzuki, K. *Synlett* **2005**, 801-804.

C:\Program Files\NUTS\data\\$LC-01-80-pure-diol-4-18-04-1H.fid

LC-01-80-pure-diol-4-18-04-1H

Apr 18 2004

USER:

SOLVENT: CD3OD

Experiment = s2pul

Pulse length = 9.625 usec

Recycle delay = 0.000 sec

NA = 32

PTS1d = 65536

F1 = 399.952240 MHz

F2 = 399.952667 MHz

SW1 = 8000.00 Hz

AT1 = 8.19 sec

Hz per Pt 1stD = 0.12 Hz

SW2 = 1.00 Hz

Hz per Pt 2ndD = 1.00 Hz

O1 = 1999.7465 Hz

O2 = -0.5000 Hz

LB1 = 0.00 Hz

TP A = -189.61

B = 103.36

C = 0.00

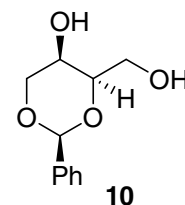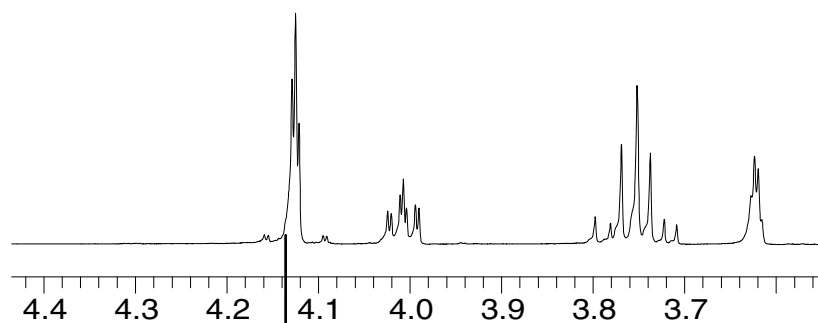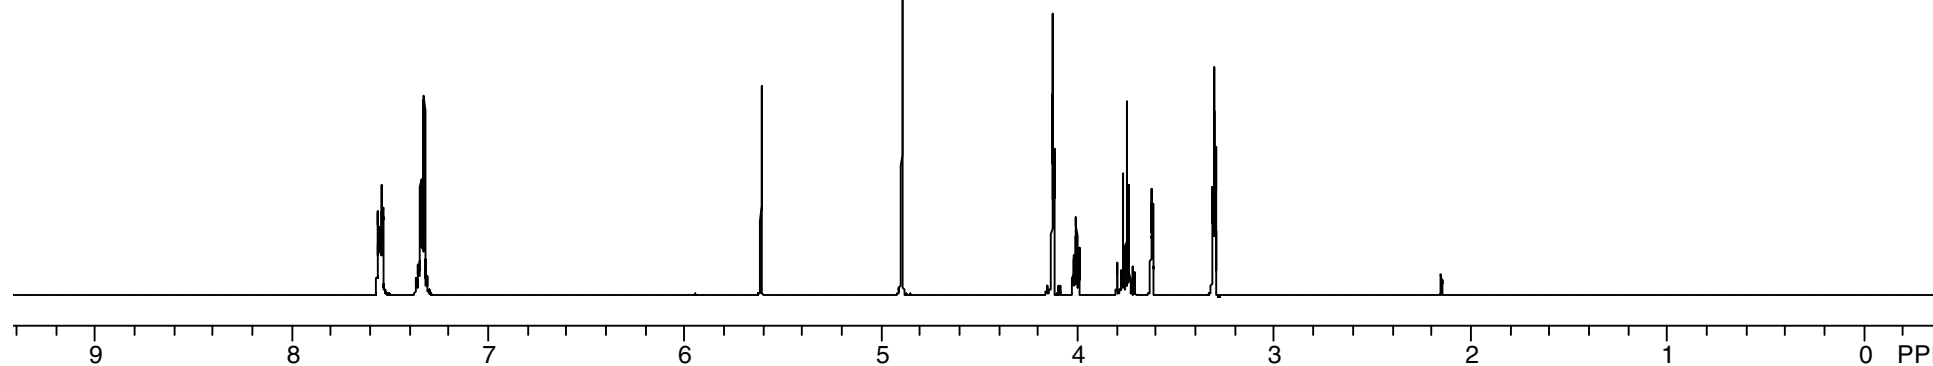

C:\Program Files\NUTS\data\LC-01-80diol-4-18-04-13C.fid

LC-01-80diol-4-18-04-13C

Apr 18 2004

USER:

SOLVENT: CD3OD

Experiment = s2pul

Pulse length = 3.925 usec

Recycle delay = 1.000 sec

NA = 381

PTS1d = 65536

F1 = 100.579140 MHz

F2 = 399.951599 MHz

SW1 = 25000.00 Hz

AT1 = 2.62 sec

Hz per Pt 1stD = 0.38 Hz

SW2 = 1.00 Hz

Hz per Pt 2ndD = 1.00 Hz

O1 = 11589.9336 Hz

O2 = -0.5000 Hz

LB1 = 0.00 Hz

TP A = -207.89

B = 175.78

C = 0.00

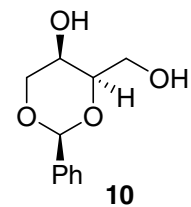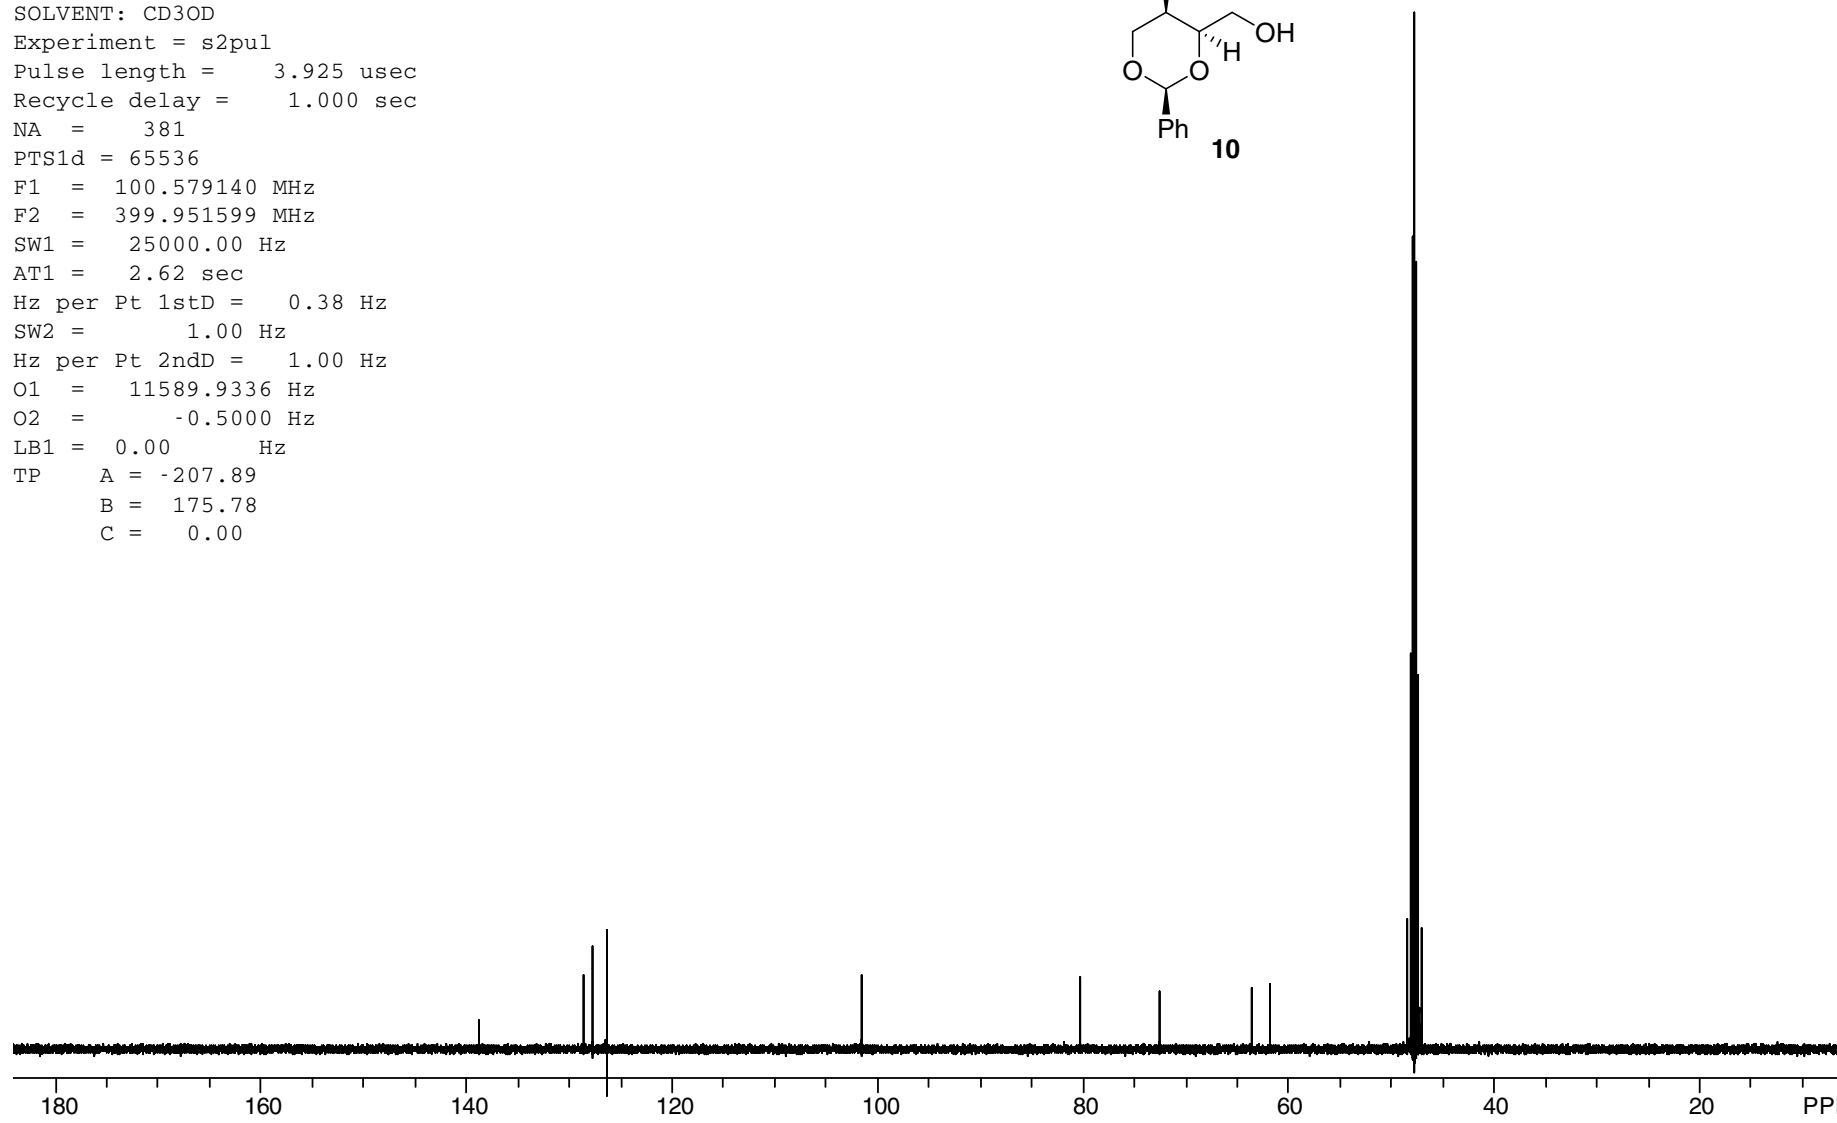



C:\Program Files\NUTS\data\1c-01-84-TBS-4-25-04-1H.fid

1c-01-84-TBS-4-25-04-1H

Apr 25 2004

USER:

SOLVENT: CDCl3

Experiment = s2pul

Pulse length = 9.625 usec

Recycle delay = 0.000 sec

NA = 32

PTS1d = 65536

F1 = 399.950684 MHz

F2 = 399.951111 MHz

SW1 = 8000.00 Hz

AT1 = 8.19 sec

Hz per Pt 1stD = 0.12 Hz

SW2 = 1.00 Hz

Hz per Pt 2ndD = 1.00 Hz

O1 = 1999.7390 Hz

O2 = -0.5000 Hz

LB1 = 0.00 Hz

TP A = 146.30

B = 112.00

C = 0.00

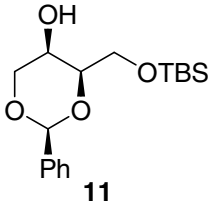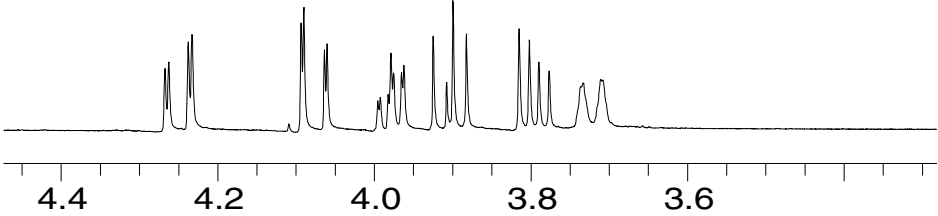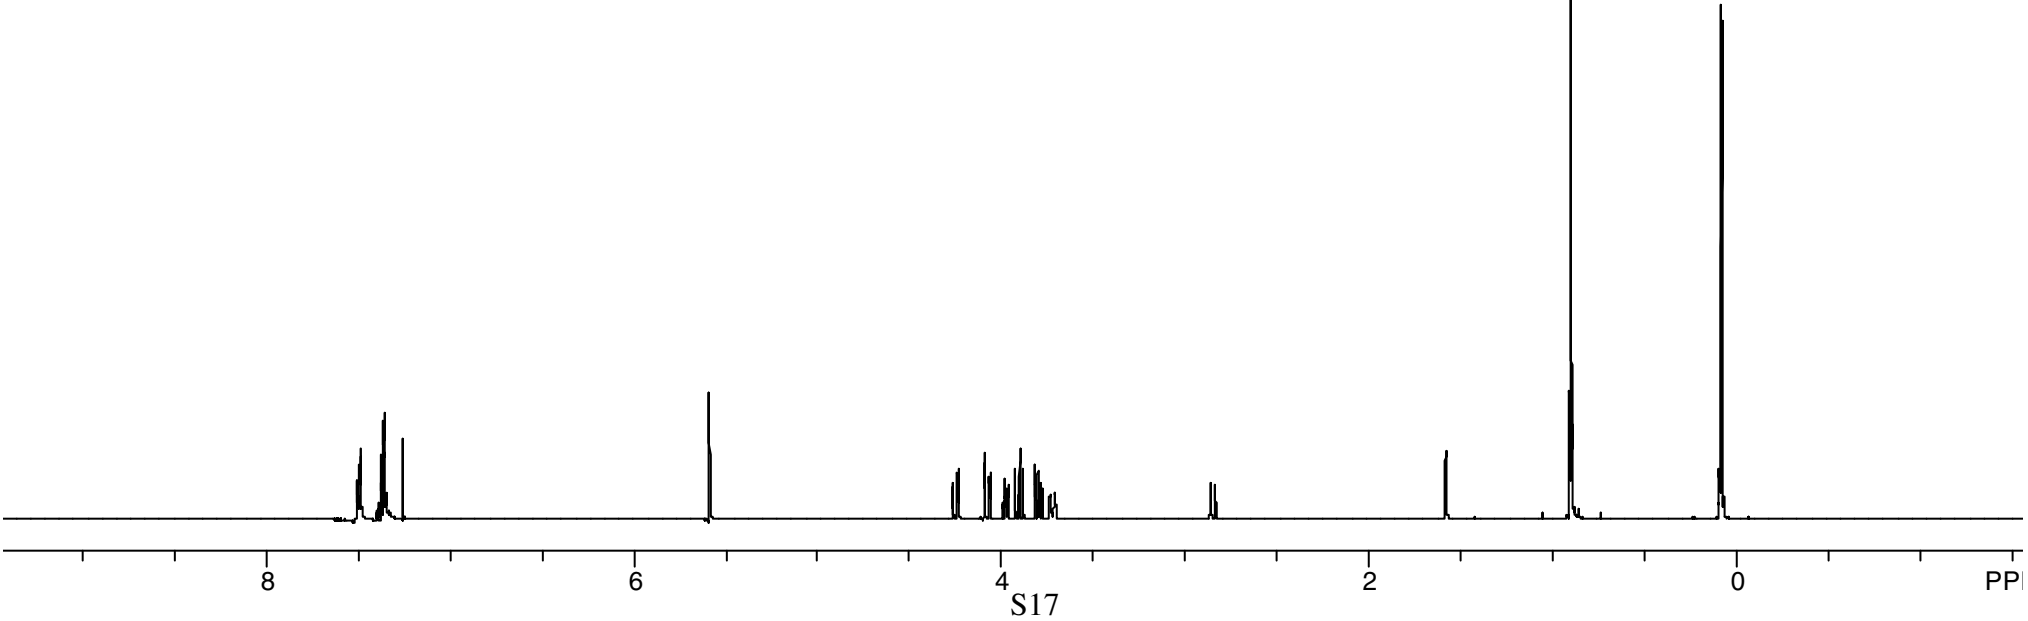

C:\Program Files\NUTS\data\lc-01-84-TBS-4-25-04-13C.fid

lc-01-84-TBS-4-25-04-13C

Apr 25 2004

USER:

SOLVENT: CDCl3

Experiment = s2pul

Pulse length = 3.925 usec

Recycle delay = 1.000 sec

NA = 224

PTS1d = 65536

F1 = 100.578743 MHz

F2 = 399.950012 MHz

SW1 = 25000.00 Hz

AT1 = 2.62 sec

Hz per Pt 1stD = 0.38 Hz

SW2 = 1.00 Hz

Hz per Pt 2ndD = 1.00 Hz

O1 = 11589.8672 Hz

O2 = -0.5000 Hz

LB1 = 0.00 Hz

TP A = 47.89

B = 204.00

C = 0.00

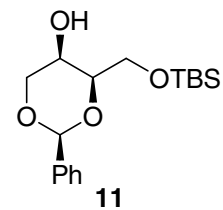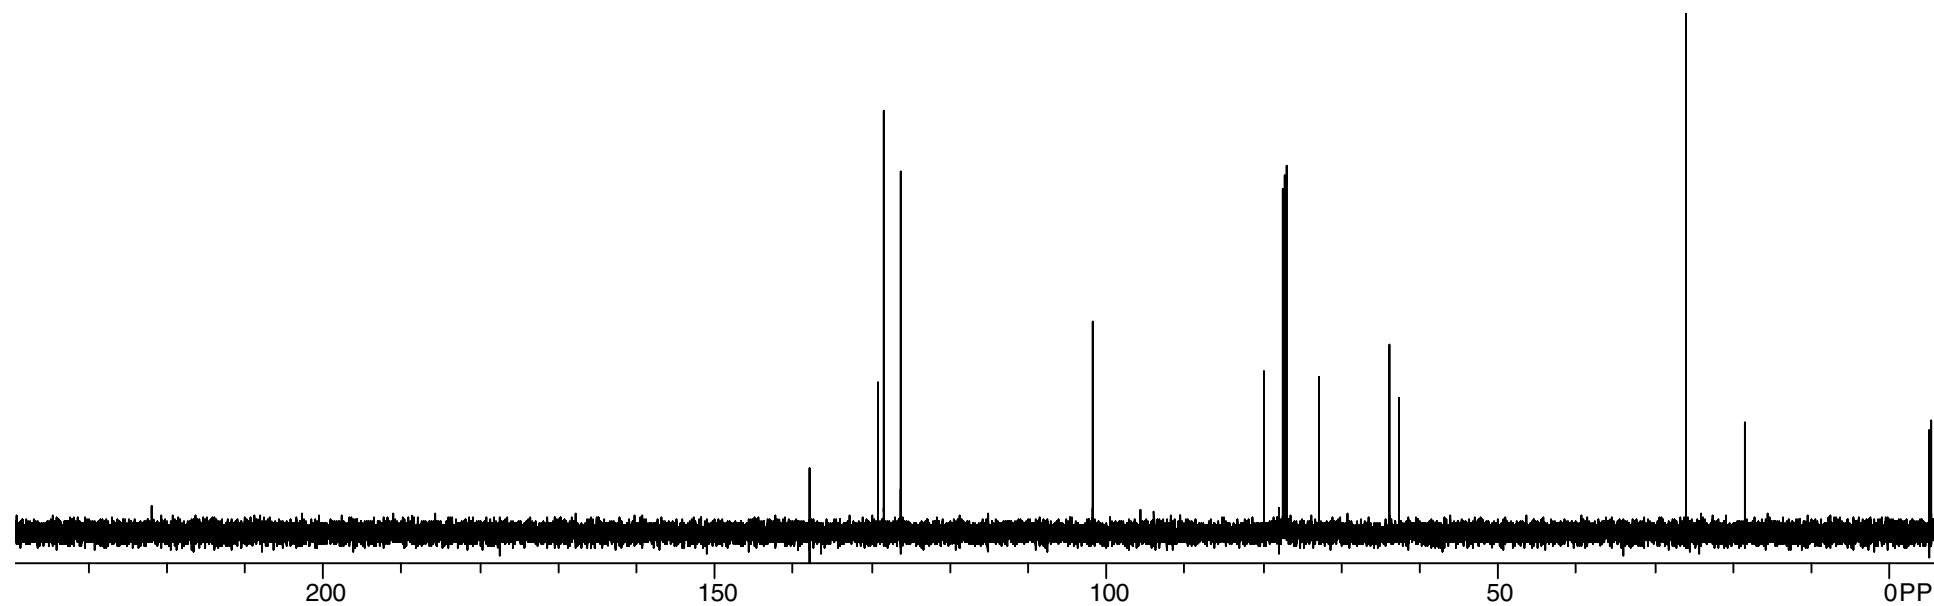

2004-1H.fid  
Program Files\NUTS\data\1c-01-keto-TBS-3-28-2004-1H.fid

1c-01-keto-TBS-3-28-2004-1H

Mar 28 2004

USER:

SOLVENT: Benzene

Experiment = s2pul

Pulse length = 5.250 usec

Recycle delay = 0.000 sec

NA = 32

PTS1d = 32768

F1 = 499.698975 MHz

F2 = 499.698975 MHz

SW1 = 7024.94 Hz

AT1 = 4.66 sec

Hz per Pt 1stD = 0.21 Hz

SW2 = 1.00 Hz

Hz per Pt 2ndD = 1.00 Hz

O1 = 2518.8293 Hz

O2 = -0.5000 Hz

LB1 = 0.00 Hz

TP A = 145.30

B = 2.00

C = 0.00

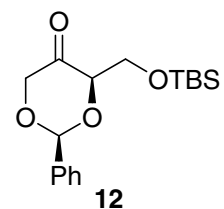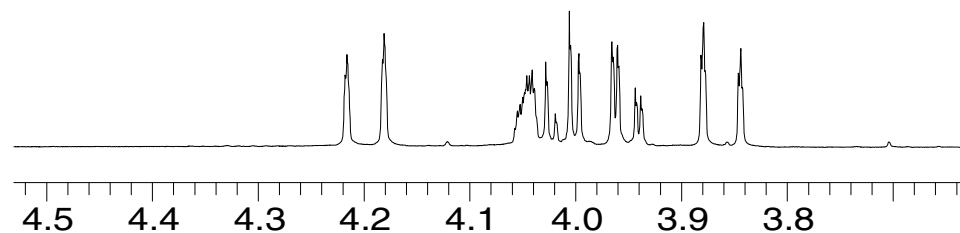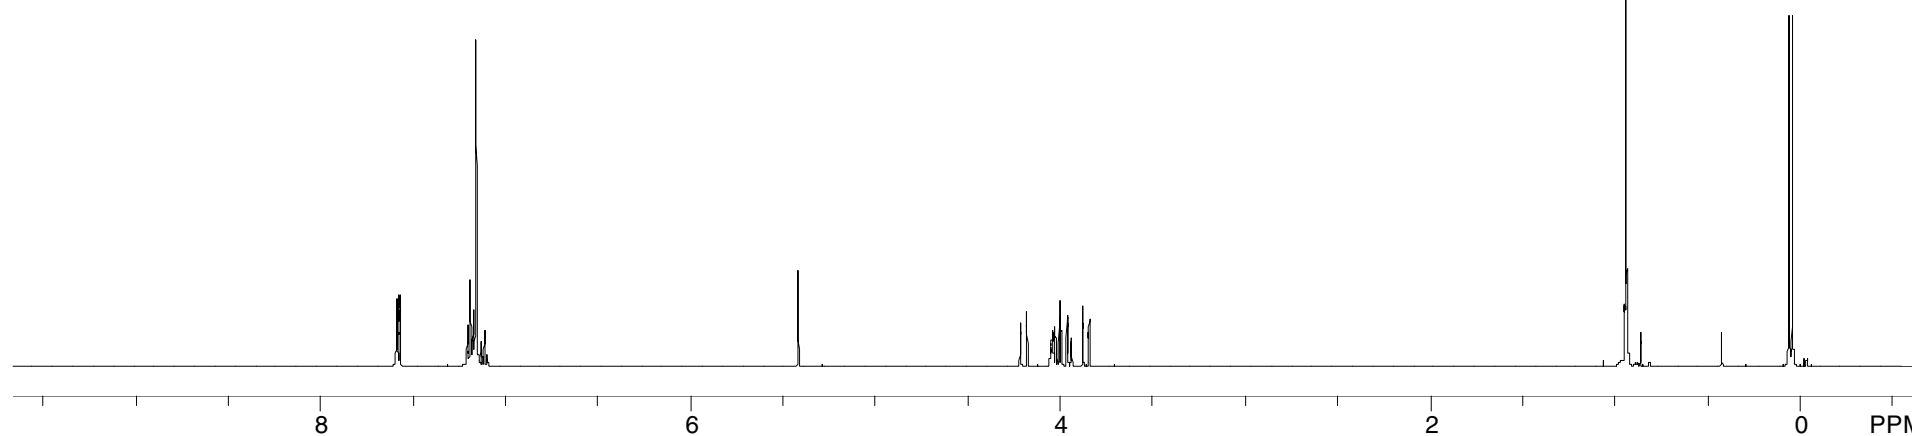

Interpolated Peak Listing

| PEAK | POINT | HEIGHT  | REL. HT | HZ       | PPM     |
|------|-------|---------|---------|----------|---------|
| 1    | 7178  | 46739K  | 5.73    | 25600.91 | 203.726 |
| 2    | 25143 | 71307K  | 8.74    | 17331.56 | 127.921 |
| 3    | 27566 | 217851K | 26.71   | 16216.30 | 129.046 |
| 4    | 27791 | 324999K | 39.85   | 16112.88 | 128.223 |
| 5    | 27801 | 38832K  | 4.76    | 16108.02 | 128.185 |
| 6    | 27828 | 782023K | 95.89   | 16095.61 | 128.086 |
| 7    | 27880 | 791292K | 97.03   | 16071.52 | 127.894 |
| 8    | 27907 | 22908K  | 2.81    | 16059.33 | 127.797 |
| 9    | 27933 | 809885K | 99.31   | 16047.41 | 127.702 |
| 10   | 28258 | 363354K | 44.55   | 15897.84 | 126.512 |
| 11   | 35779 | 139910K | 17.16   | 12435.55 | 98.960  |
| 12   | 39821 | 230942K | 28.32   | 10575.21 | 84.156  |
| 13   | 42991 | 174353K | 21.38   | 9115.94  | 72.543  |
| 14   | 45638 | 201488K | 24.71   | 7897.65  | 62.848  |
| 15   | 55741 | 36393K  | 4.46    | 3247.47  | 25.843  |
| 16   | 55744 | 505748K | 62.01   | 3245.69  | 25.829  |
| 17   | 55746 | 51067K  | 6.26    | 3245.15  | 25.824  |
| 18   | 55748 | 23084K  | 2.83    | 3244.30  | 25.818  |
| 19   | 57786 | 103410K | 12.68   | 2305.90  | 18.350  |
| 20   | 64248 | 104818K | 12.85   | -668.79  | -5.322  |
| 21   | 64283 | 129466K | 15.87   | -684.77  | -5.449  |

127.921  
129.046  
128.223  
128.185  
128.086  
127.894  
127.797  
127.702  
126.512

98.960

84.156

72.543

62.848

25.843

25.829

25.824

25.818

18.350

-5.322

-5.449

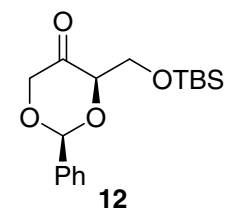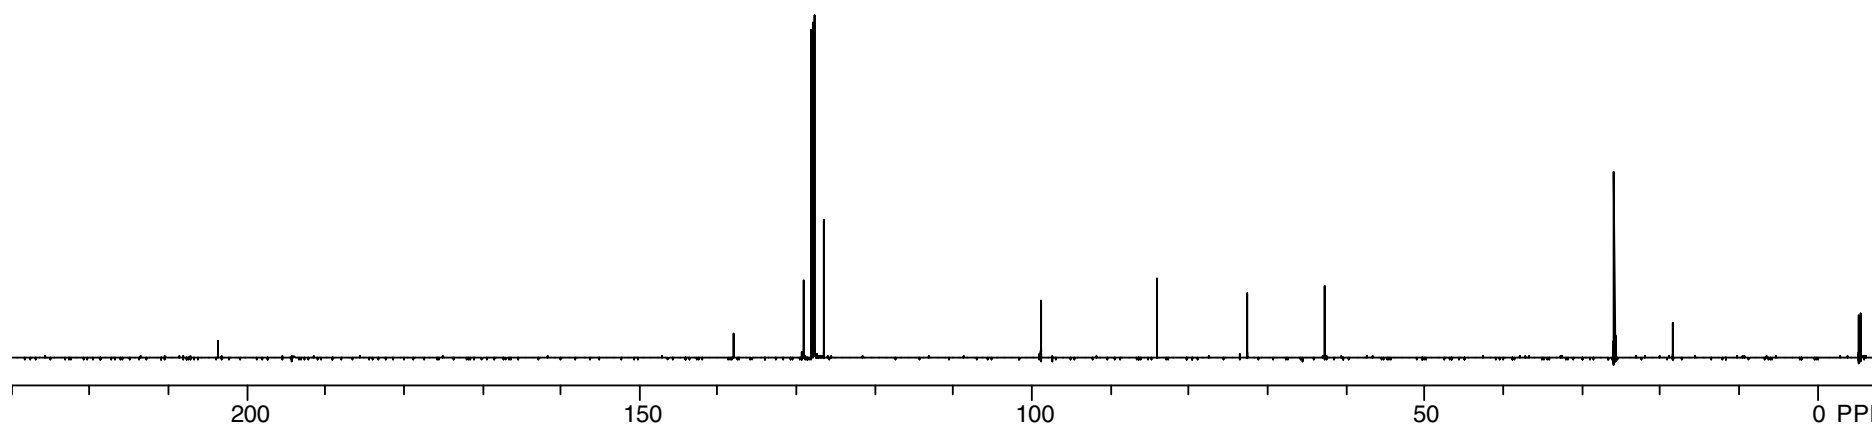

C:\Program Files\NUTS\data\1c-02-100-methyl-OTBS-1-15-04-1H.fid

STANDARD PROTON PARAMETERS

Jan 15 2005

USER:

SOLVENT: Benzene

Experiment = s2pul

Pulse length = 5.800 usec

Recycle delay = 0.000 sec

NA = 16

PTS1d = 65536

F1 = 499.698975 MHz

F2 = 499.698975 MHz

SW1 = 7024.94 Hz

AT1 = 9.33 sec

Hz per Pt 1stD = 0.11 Hz

SW2 = 1.00 Hz

Hz per Pt 2ndD = 1.00 Hz

O1 = 2517.7644 Hz

O2 = -0.5000 Hz

LB1 = 0.00 Hz

TP A = 95.16

B = 5.63

C = 0.00

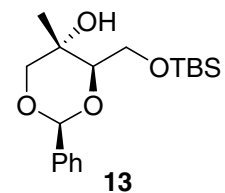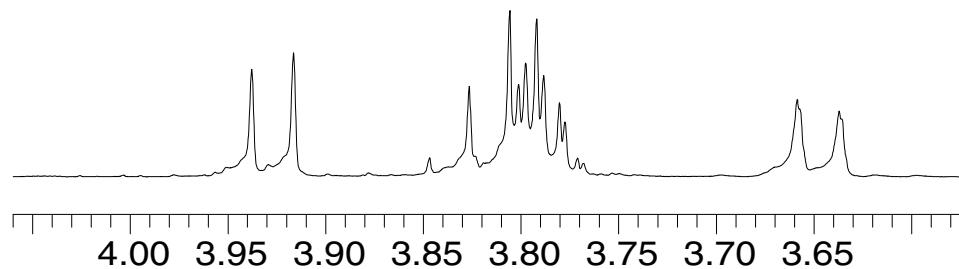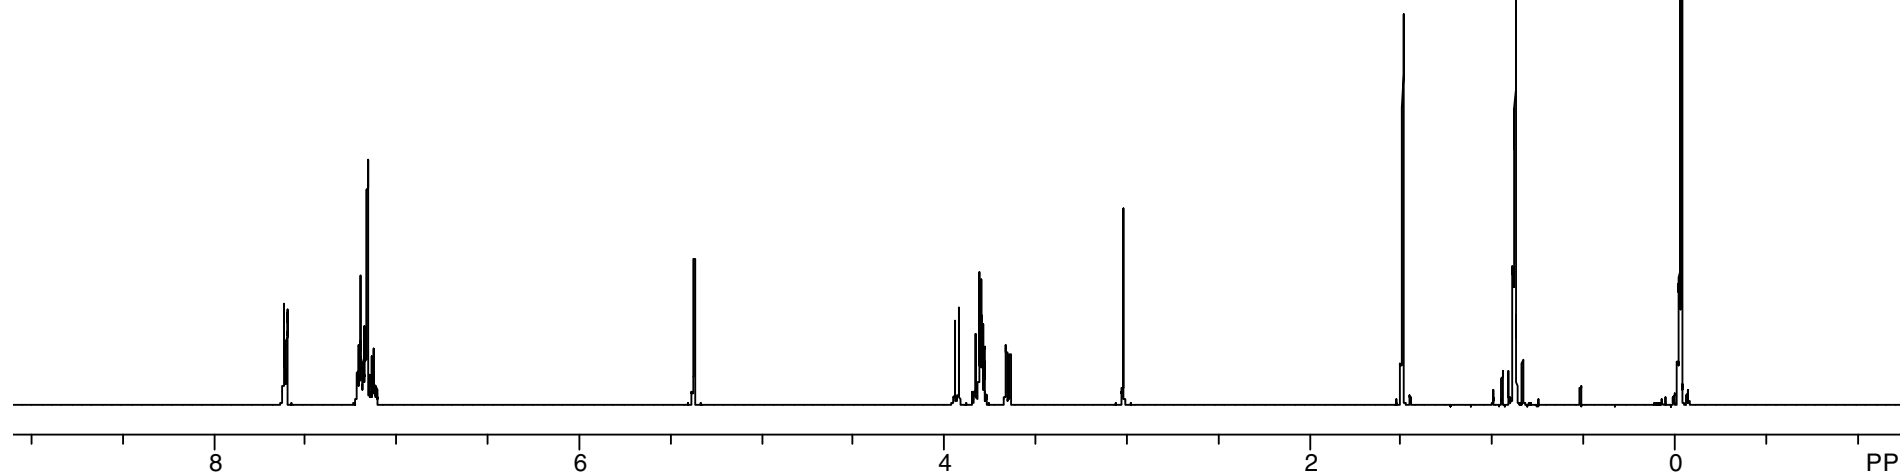

S21

C:\Program Files\NUTS\data\lcl-02-100-methyl-OTBS-1-15-05-13C.fid

lcl-02-100-methyl-OTBS-1-15-05-13C

Jan 15 2005

USER:

SOLVENT: Benzene

Experiment = s2pul

Pulse length = 4.300 usec

Recycle delay = 1.000 sec

NA = 225

PTS1d = 65536

F1 = 125.662575 MHz

F2 = 499.698151 MHz

SW1 = 30165.91 Hz

AT1 = 2.17 sec

Hz per Pt 1stD = 0.46 Hz

SW2 = 1.00 Hz

Hz per Pt 2ndD = 1.00 Hz

O1 = 13821.7314 Hz

O2 = -0.5000 Hz

LB1 = 0.00 Hz

TP A = -163.98

B = 129.00

C = 0.00

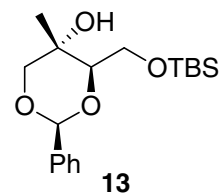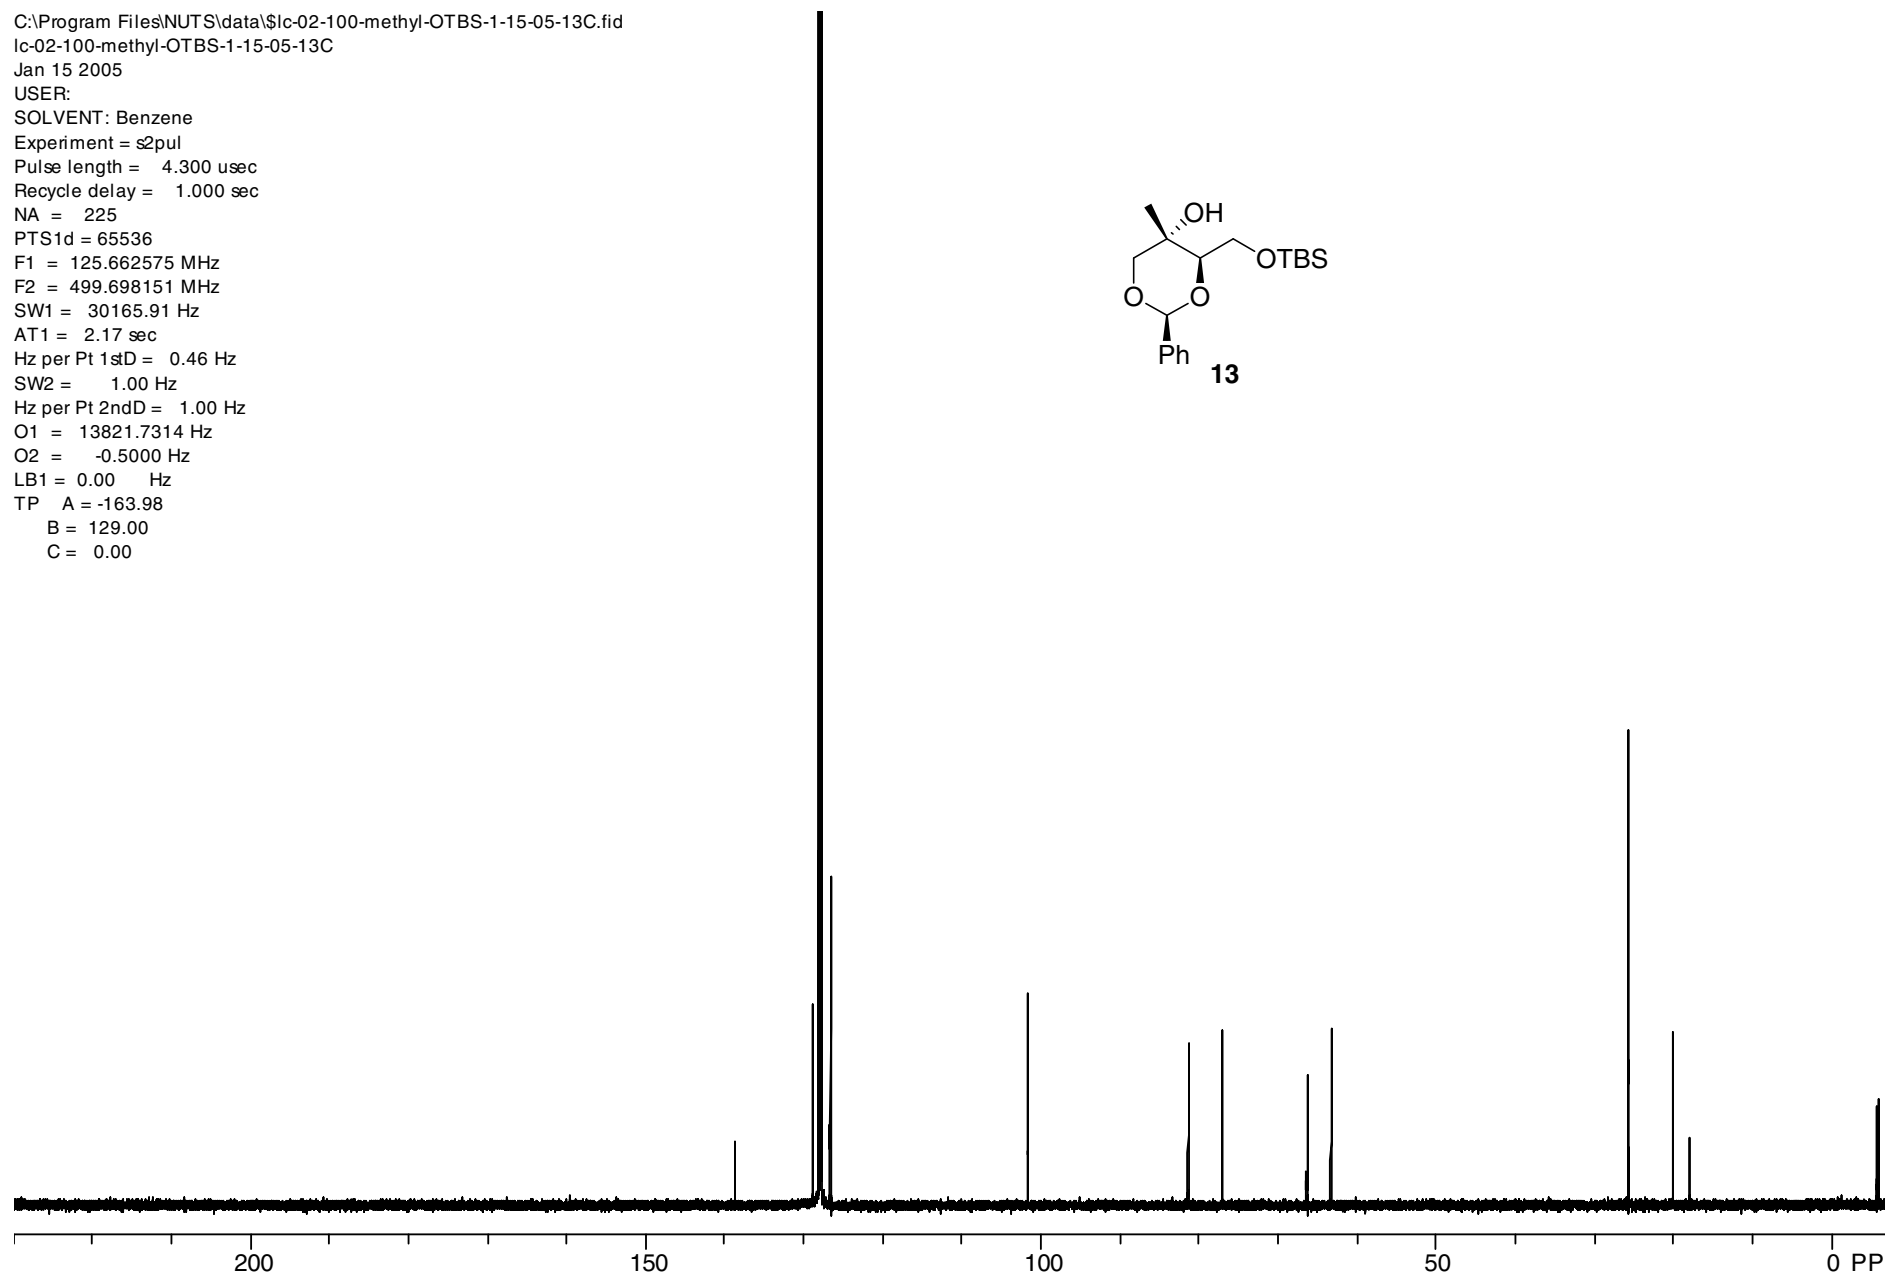

C:\Program Files\NUTS\data\upper-Me-OH-4-20-07-1H.fid

upper-Me-OH-4-20-07-1H

Apr 20 2007

USER:

SOLVENT: Benzene

Experiment = s2pul

Pulse length = 6.500 usec

Recycle delay = 0.000 sec

NA = 32

PTS1d = 65536

F1 = 499.698975 MHz

F2 = 499.698975 MHz

SW1 = 7024.94 Hz

AT1 = 9.33 sec

Hz per Pt 1stD = 0.11 Hz

SW2 = 1.00 Hz

Hz per Pt 2ndD = 1.00 Hz

O1 = 2518.8926 Hz

O2 = -0.5000 Hz

LB1 = 0.00 Hz

TP A = 175.31

B = -7.03

C = 0.00

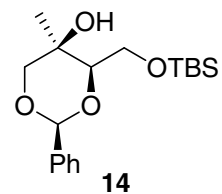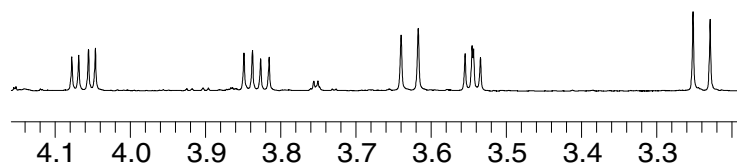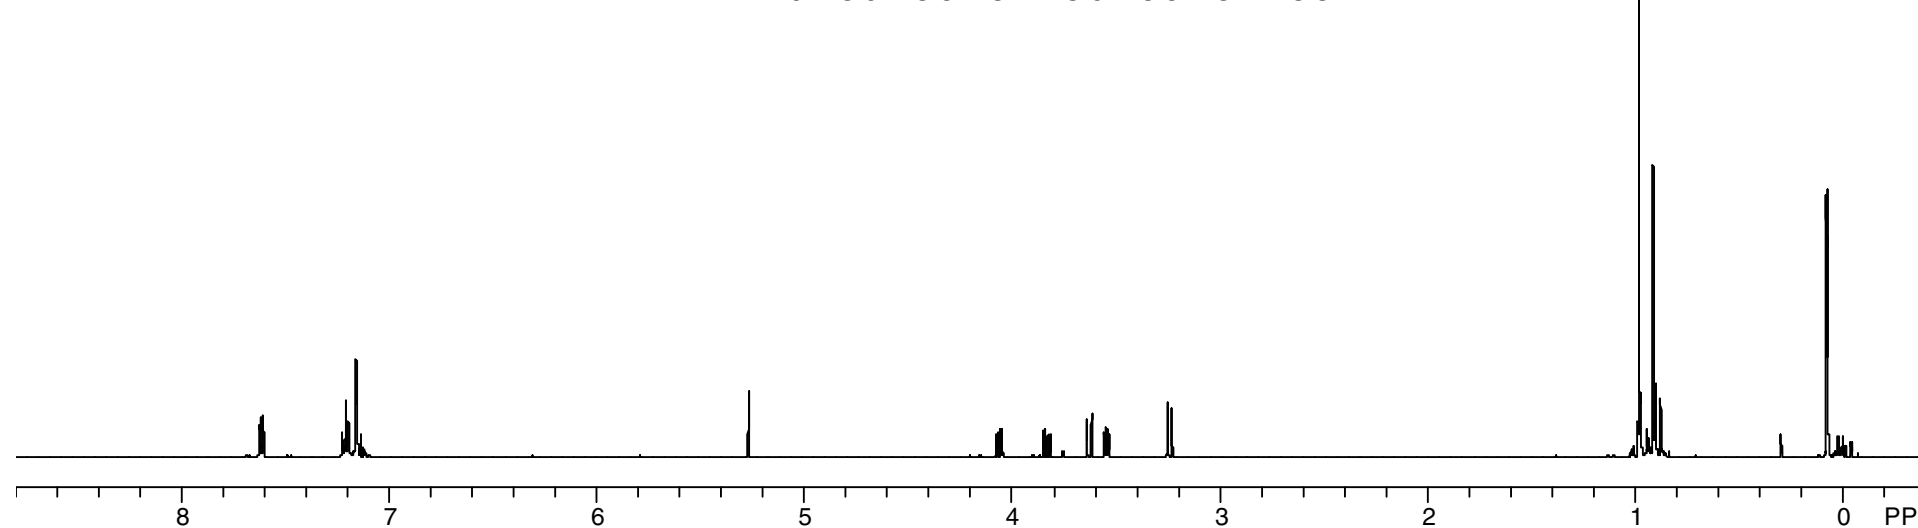

C:\Program Files\NUTS\data\Upper-MeOH-TBS-4-20-07-13C.fid  
upper-Me-OH-4-20-07-13C

Apr 20 2007

USER:

SOLVENT: Benzene

Experiment = s2pul

Pulse length = 6.000 usec

Recycle delay = 1.000 sec

NA = 245

PTS1d = 65536

F1 = 125.662575 MHz

F2 = 499.698151 MHz

SW1 = 30165.91 Hz

AT1 = 2.17 sec

Hz per Pt 1stD = 0.46 Hz

SW2 = 1.00 Hz

Hz per Pt 2ndD = 1.00 Hz

O1 = 13821.7314 Hz

O2 = -0.5000 Hz

LB1 = 0.00 Hz

TP A = -81.63

B = 154.00

C = 0.00

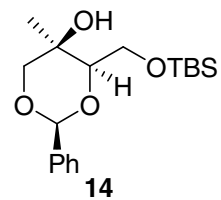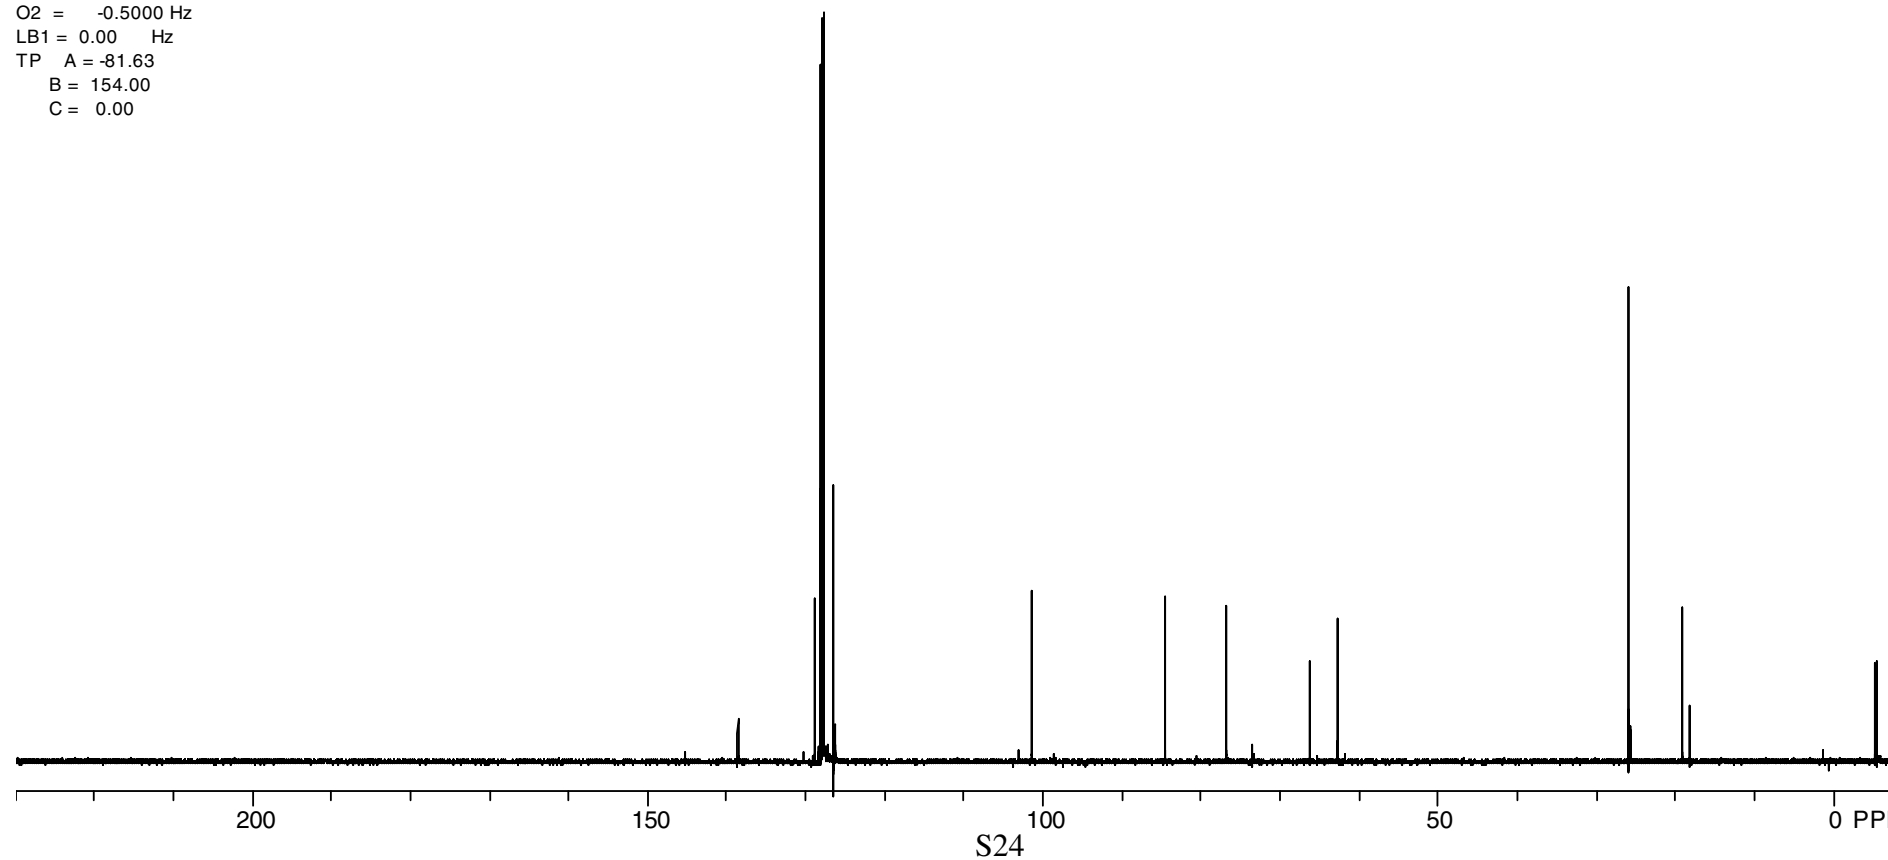



C:\Program Files\NUTS\data\1c-03-1-3-benz-2C-ME-7-16-05-1H.fid

1c-03-2C-ME-7-16-05-1H

Jul 16 2005

USER:

SOLVENT: pyridne

Experiment = s2pul

Pulse length = 5.800 usec

Recycle delay = 0.000 sec

NA = 16

PTS1d = 65536

F1 = 499.700073 MHz

F2 = 499.700073 MHz

SW1 = 7024.94 Hz

AT1 = 9.33 sec

Hz per Pt 1stD = 0.11 Hz

SW2 = 1.00 Hz

Hz per Pt 2ndD = 1.00 Hz

O1 = 3616.0020 Hz

O2 = -0.5000 Hz

LB1 = 0.00 Hz

TP A = 66.68

B = 12.66

C = 0.00

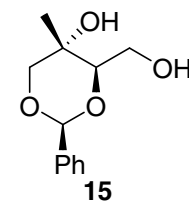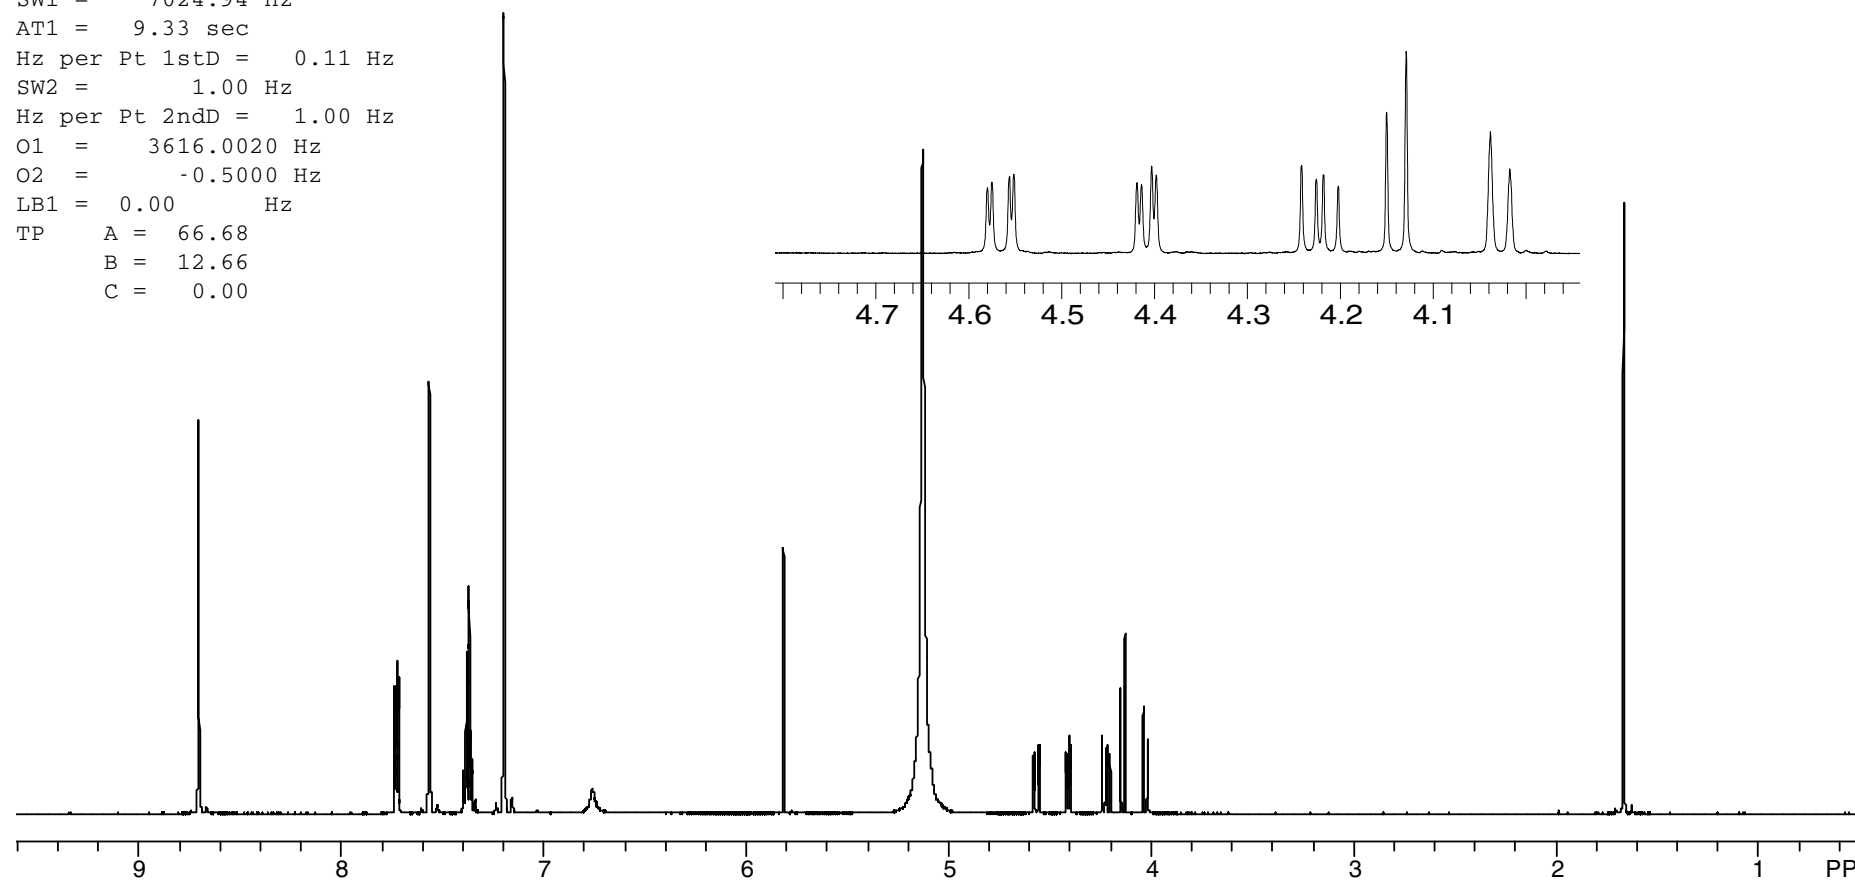

C:\Program Files\NUTS\data\Ic-03-1-3-benz-2C-ME-7-16-05-13C.fid

Ic-03-1,3-benz-2C-ME-7-16-05-13C

Jul 16 2005

USER:

SOLVENT: pyridine

Experiment = s2pul

Pulse length = 4.300 usec

Recycle delay = 1.000 sec

NA = 203

PTS1d = 65536

F1 = 125.662521 MHz

F2 = 499.697968 MHz

SW1 = 30165.91 Hz

AT1 = 2.17 sec

Hz per Pt 1stD = 0.46 Hz

SW2 = 1.00 Hz

Hz per Pt 2ndD = 1.00 Hz

O1 = 13821.6904 Hz

O2 = -0.5000 Hz

LB1 = 0.00 Hz

TP A = -59.06

B = 172.00

C = 0.00

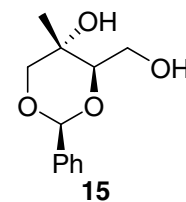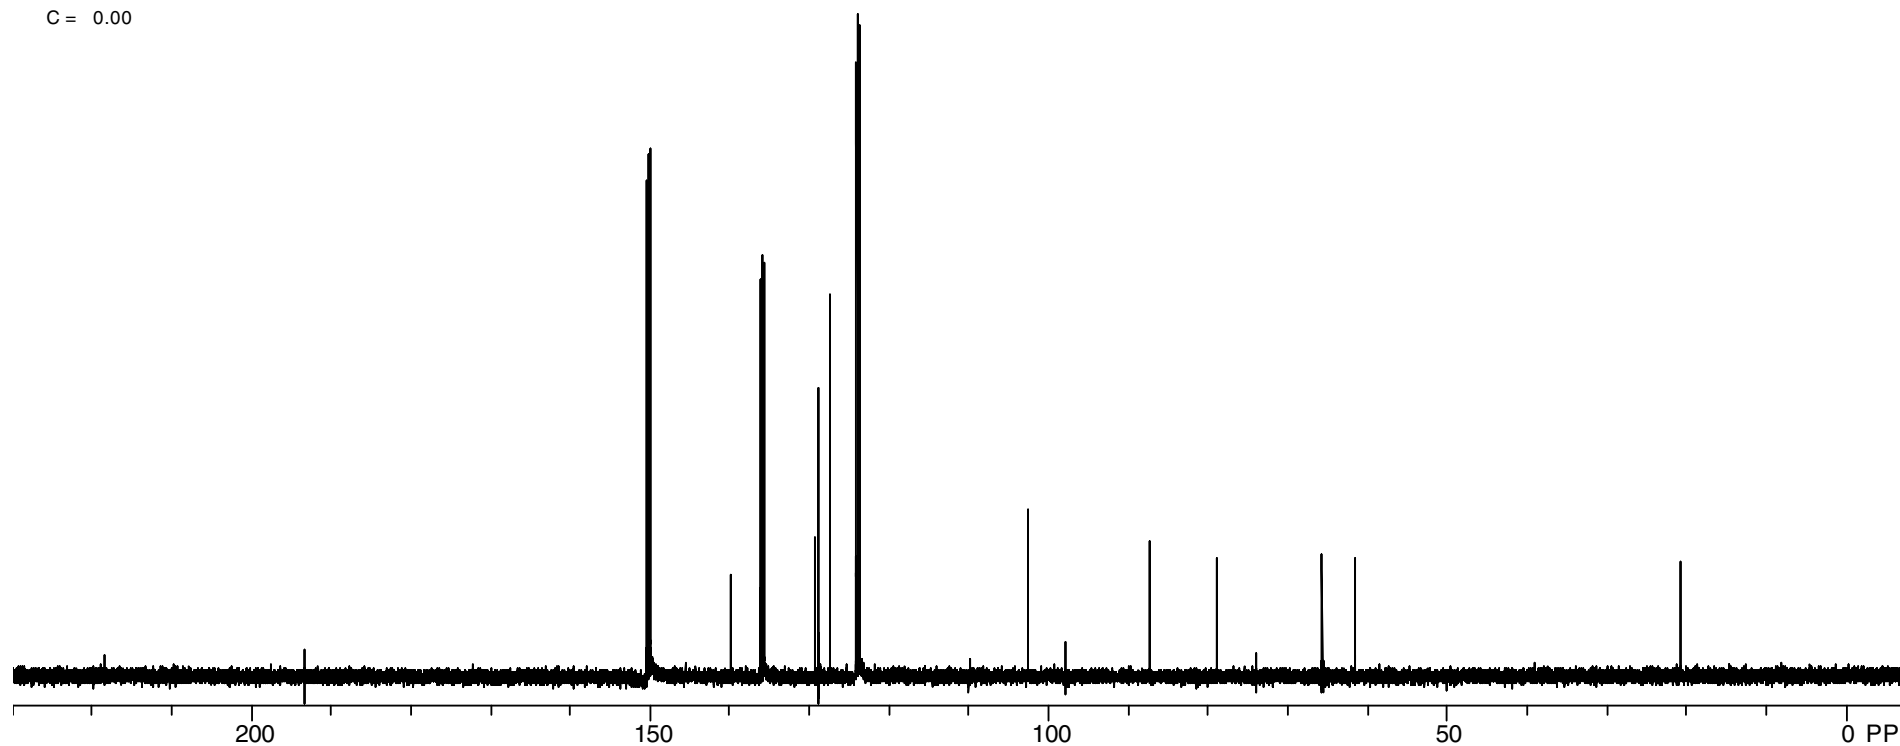

C:\Program Files\NUTS\data\1c-03--benz-ery-mono-phosho-5-24-05-1H.fid

1c-03--benz-ery-mono-phosho-5-24-05-1H

May 24 2005

USER:

SOLVENT: Acetone

Experiment = s2pul

Pulse length = 8.975 usec

Recycle delay = 0.000 sec

NA = 8

PTS1d = 65536

F1 = 399.952759 MHz

F2 = 399.953186 MHz

SW1 = 8000.00 Hz

AT1 = 8.19 sec

Hz per Pt 1stD = 0.12 Hz

SW2 = 1.00 Hz

Hz per Pt 2ndD = 1.00 Hz

O1 = 1999.8096 Hz

O2 = -0.5000 Hz

LB1 = 0.00 Hz

TP A = -110.93

B = 65.00

C = 0.00

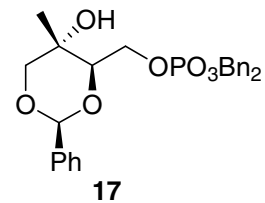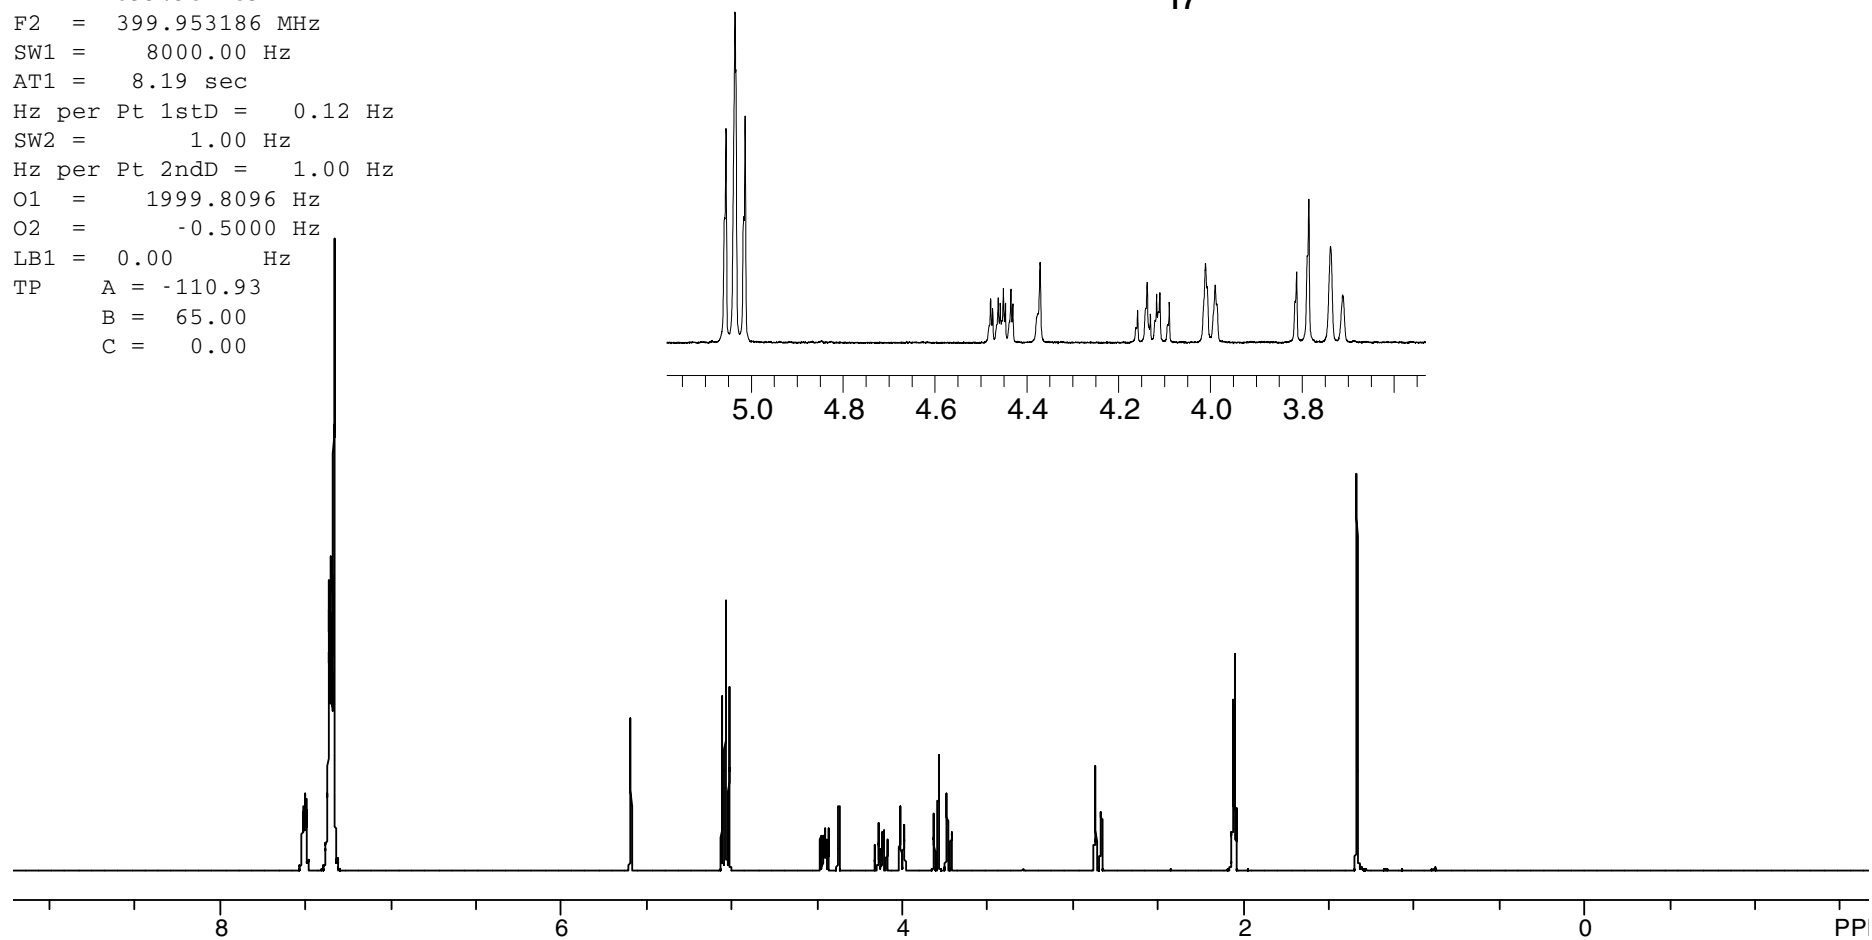

C:\Program Files\NUTS\data\1c-03--benz-ery-mono-phosho-5-24-05-31P.fid

1c-03--benz-ery-mono-phosho-5-24-05-31P

May 24 2005

USER:

SOLVENT: Acetone

Experiment = s2pul

Pulse length = 4.700 usec

Recycle delay = 1.000 sec

NA = 141

PTS1d = 65536

F1 = 161.903473 MHz

F2 = 399.952087 MHz

SW1 = 40000.00 Hz

AT1 = 1.64 sec

Hz per Pt 1stD = 0.61 Hz

SW2 = 1.00 Hz

Hz per Pt 2ndD = 1.00 Hz

O1 = 625.2930 Hz

O2 = -0.5000 Hz

LB1 = 0.00 Hz

TP A = 140.43

B = 5.00

C = 0.00

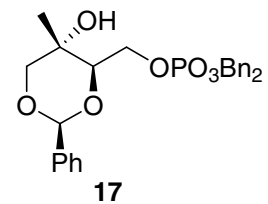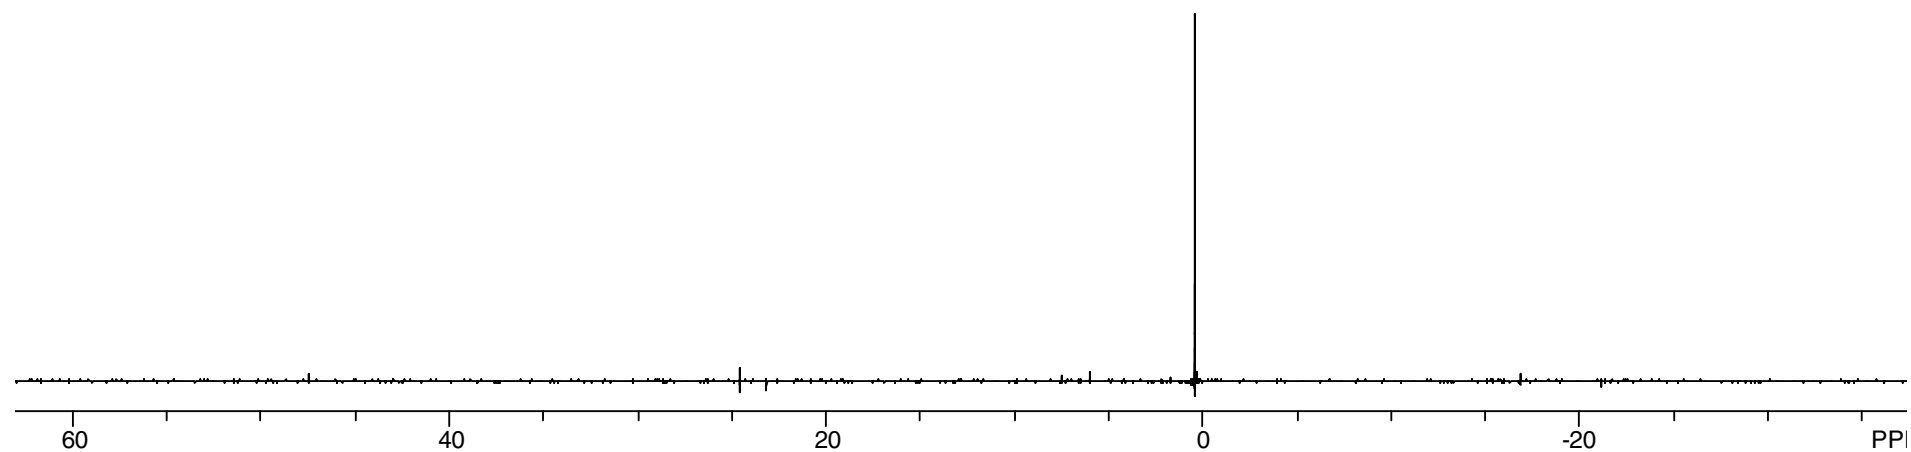

C:\Program Files\NUTS\data\1c-03--2C-MEP-5-24-05-1H.fid

1c-03--2C-MEP-5-24-05-1H

May 24 2005

USER:

SOLVENT: D2O

Experiment = s2pul

Pulse length = 5.800 usec

Recycle delay = 0.000 sec

NA = 16

PTS1d = 65536

F1 = 499.700226 MHz

F2 = 499.700226 MHz

SW1 = 7024.94 Hz

AT1 = 9.33 sec

Hz per Pt 1stD = 0.11 Hz

SW2 = 1.00 Hz

Hz per Pt 2ndD = 1.00 Hz

O1 = 2496.0183 Hz

O2 = -0.5000 Hz

LB1 = 0.00 Hz

TP A = 40.47

B = 1.00

C = 0.00

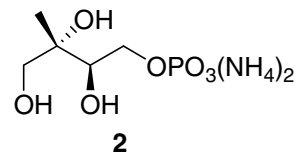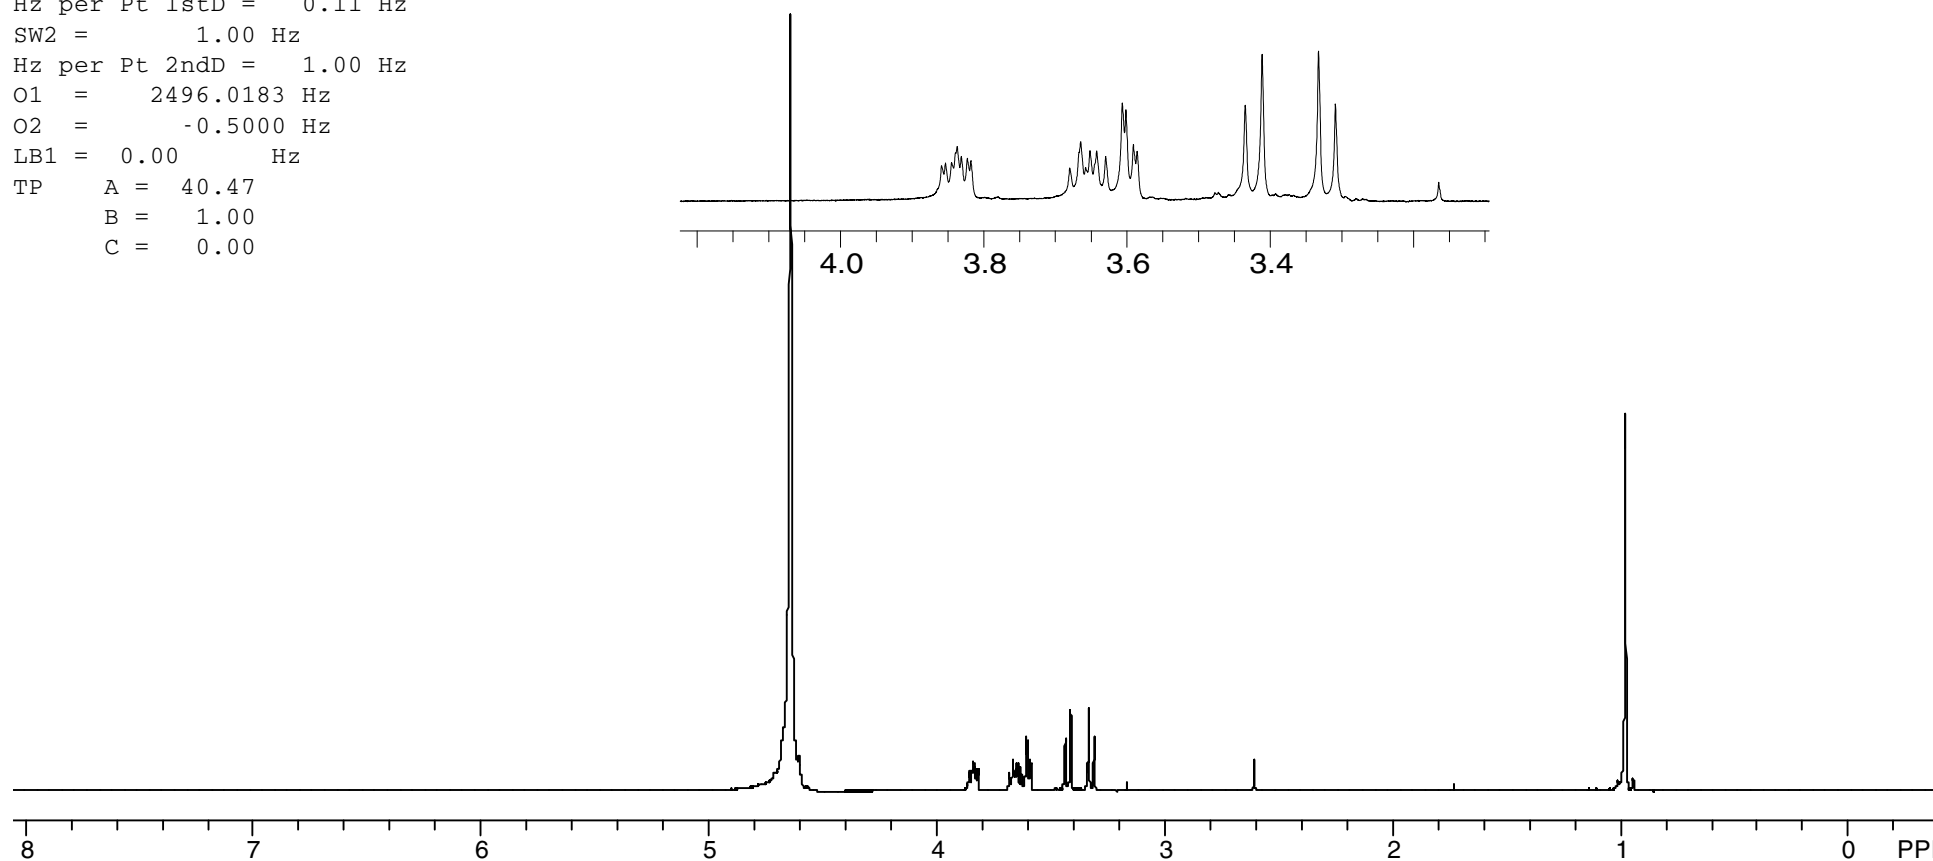

C:\Program Files\NUTS\data\Ic-03-2C-MEP-5-24-05-31P.fid

Ic-03-2C-MEP-5-24-05-31P

May 24 2005

USER:

SOLVENT: D2O

Experiment = s2pul

Pulse length = 4.825 usec

Recycle delay = 1.000 sec

NA = 117

PTS1d = 65536

F1 = 202.284744 MHz

F2 = 499.699402 MHz

SW1 = 50000.00 Hz

AT1 = 1.31 sec

Hz per Pt 1stD = 0.76 Hz

SW2 = 1.00 Hz

Hz per Pt 2ndD = 1.00 Hz

O1 = 3622.5781 Hz

O2 = -0.5000 Hz

LB1 = 0.00 Hz

TP A = 374.06

B = -378.28

C = 0.00

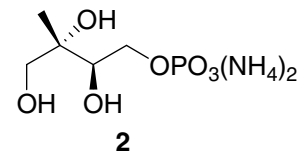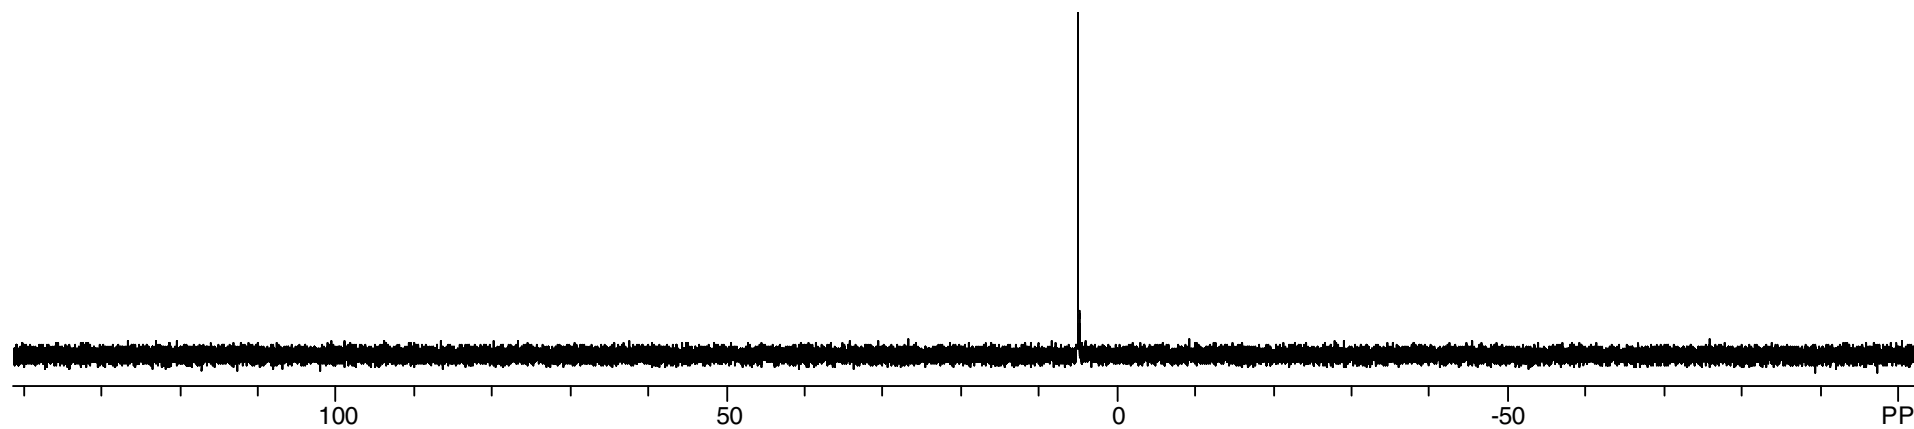

S30

C:\Program Files\NUTS\DATA\URA598-RC.fid

URA598-RC

May 6 2003

USER:

SOLVENT: D2O

Experiment = s2pul

Pulse length = 5.637 usec

Recycle delay = 0.000 sec

NA = 8

PTS1d = 65536

F1 = 499.700226 MHz

F2 = 499.700226 MHz

SW1 = 7024.94 Hz

AT1 = 9.33 sec

Hz per Pt 1stD = 0.11 Hz

SW2 = 1.00 Hz

Hz per Pt 2ndD = 1.00 Hz

O1 = 2488.6506 Hz

O2 = -0.5000 Hz

LB1 = 0.00 Hz

TP A = -52.50

B = 8.09

C = 0.00

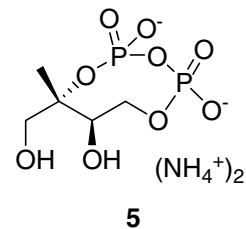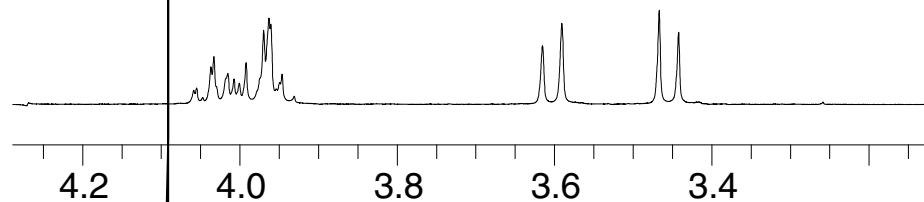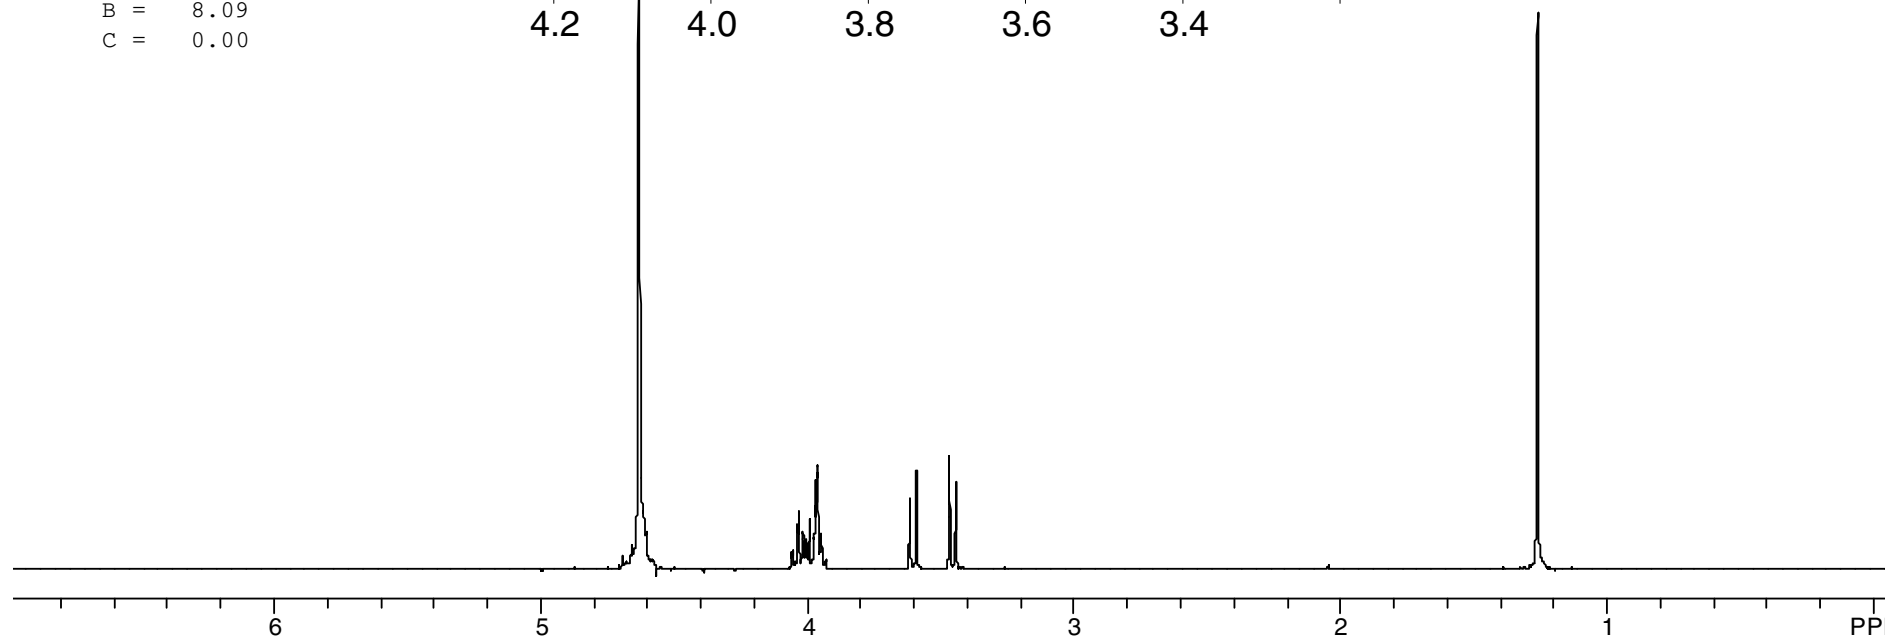

C:\Program Files\NUTS\DATA\URA598-RC\_13C.fid  
 URA598-RC  
 May 6 2003  
 USER:  
 SOLVENT: D2O  
 Experiment = s2pul  
 Pulse length = 4.500 usec  
 Recycle delay = 1.000 sec  
 NA = 499  
 PTS1d = 65536  
 F1 = 125.662888 MHz  
 F2 = 499.699402 MHz  
 SW1 = 30165.91 Hz  
 AT1 = 2.17 sec  
 Hz per Pt 1stD = 0.46 Hz  
 SW2 = 1.00 Hz  
 Hz per Pt 2ndD = 1.00 Hz  
 O1 = 13821.7246 Hz  
 O2 = -0.5000 Hz  
 LB1 = 0.00 Hz  
 TP A = -101.72  
 B = 56.25  
 C = 0.00

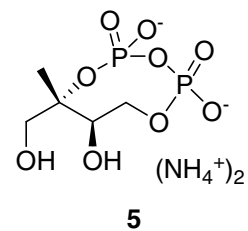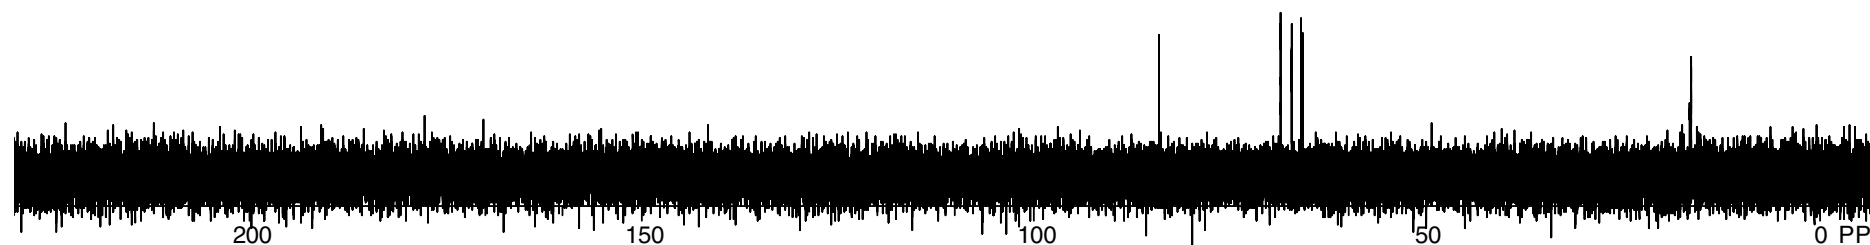



C:\Program Files\NUTS\DATA\URA598-RC\_31P.fid

URA598-RC

May 6 2003

USER:

SOLVENT: D2O

Experiment = s2pul

Pulse length = 4.375 usec

Recycle delay = 1.000 sec

NA = 209

PTS1d = 65536

F1 = 202.284744 MHz

F2 = 499.699402 MHz

SW1 = 50000.00 Hz

AT1 = 1.31 sec

Hz per Pt 1stD = 0.76 Hz

SW2 = 1.00 Hz

Hz per Pt 2ndD = 1.00 Hz

O1 = 3622.5781 Hz

O2 = -0.5000 Hz

LB1 = 0.00 Hz

TP A = 140.16

B = -119.53

C = 0.00

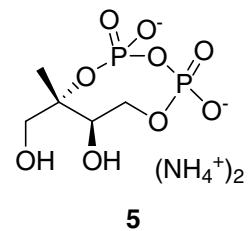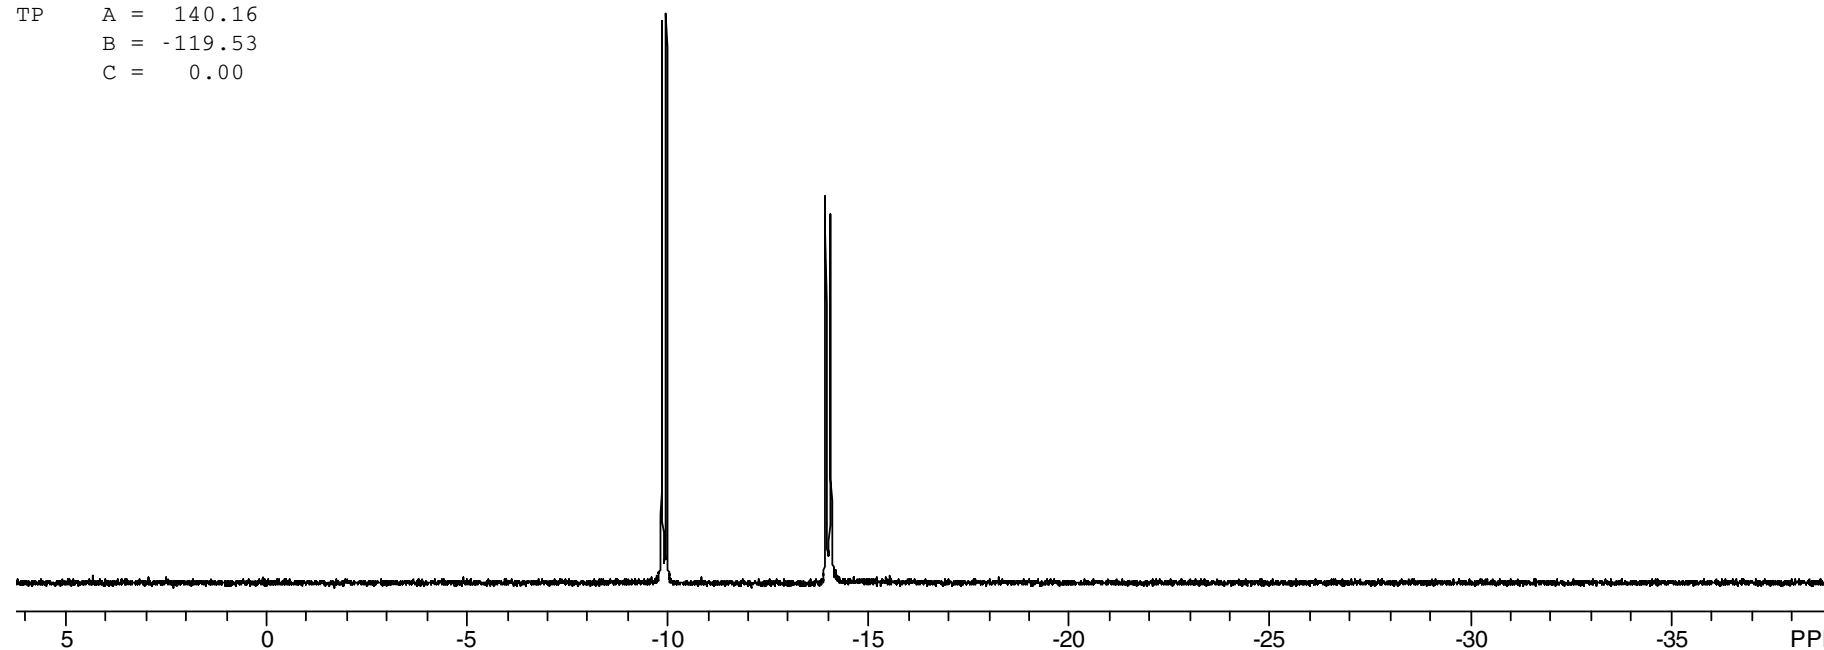

C:\Program Files\NUTS\data\1c-02-76-olefin-12-10-04-1H.fid

1c-02-76-olefin-12-10-04-1H

Dec 10 2004

USER:

SOLVENT: Benzene

Experiment = s2pul

Pulse length = 5.800 usec

Recycle delay = 0.000 sec

NA = 16

PTS1d = 65536

F1 = 499.698975 MHz

F2 = 499.698975 MHz

SW1 = 7024.94 Hz

AT1 = 9.33 sec

Hz per Pt 1stD = 0.11 Hz

SW2 = 1.00 Hz

Hz per Pt 2ndD = 1.00 Hz

O1 = 2496.0598 Hz

O2 = -0.5000 Hz

LB1 = 0.00 Hz

TP A = 125.46

B = 13.00

C = 0.00

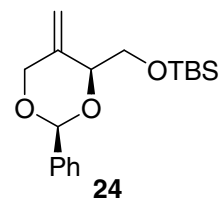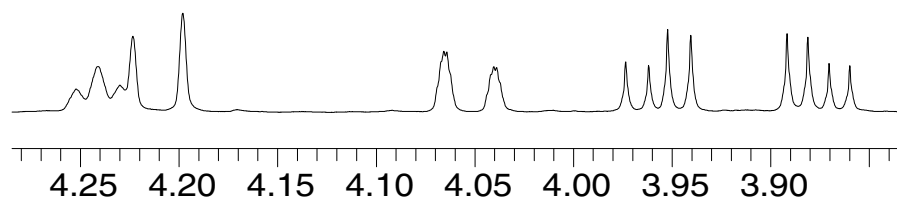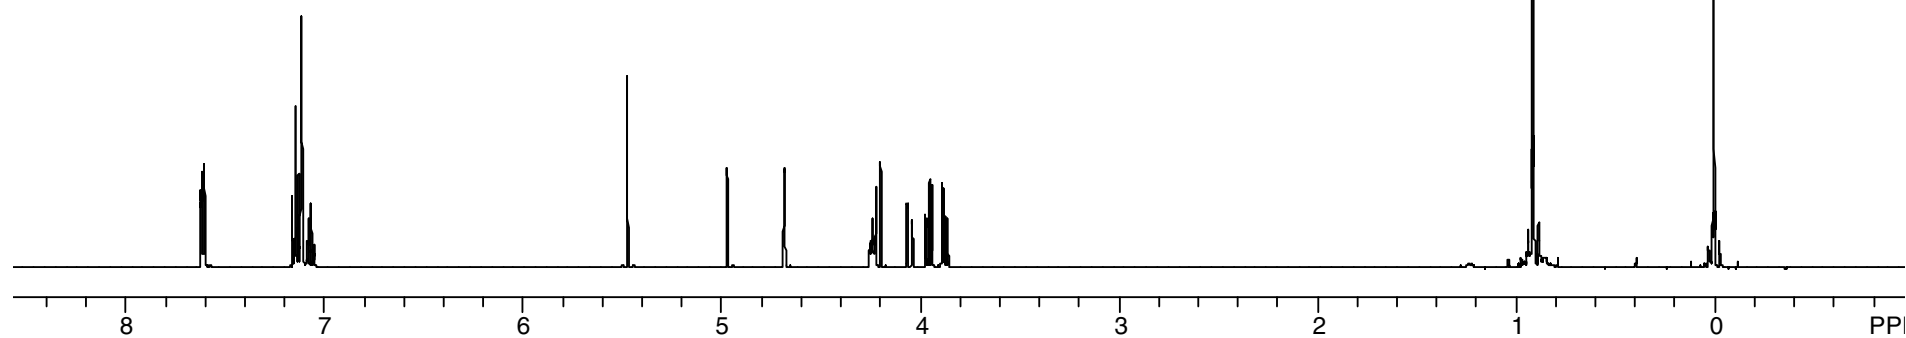

C:\Program Files\NUTS\data\l0-02-76-olefin-12-10-04-13C.fid

l0-02-76-olefin-12-10-04-13C

Dec 10 2004

USER:

SOLVENT: Benzene

Experiment = s2pul

Pulse length = 4.300 usec

Recycle delay = 1.000 sec

NA = 232

PTS1d = 65536

F1 = 125.662575 MHz

F2 = 499.698151 MHz

SW1 = 30165.91 Hz

AT1 = 2.17 sec

Hz per Pt 1stD = 0.46 Hz

SW2 = 1.00 Hz

Hz per Pt 2ndD = 1.00 Hz

O1 = 13821.7314 Hz

O2 = -0.5000 Hz

LB1 = 0.00 Hz

TP A = -154.77

B = 129.00

C = 0.00

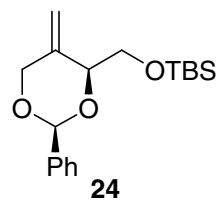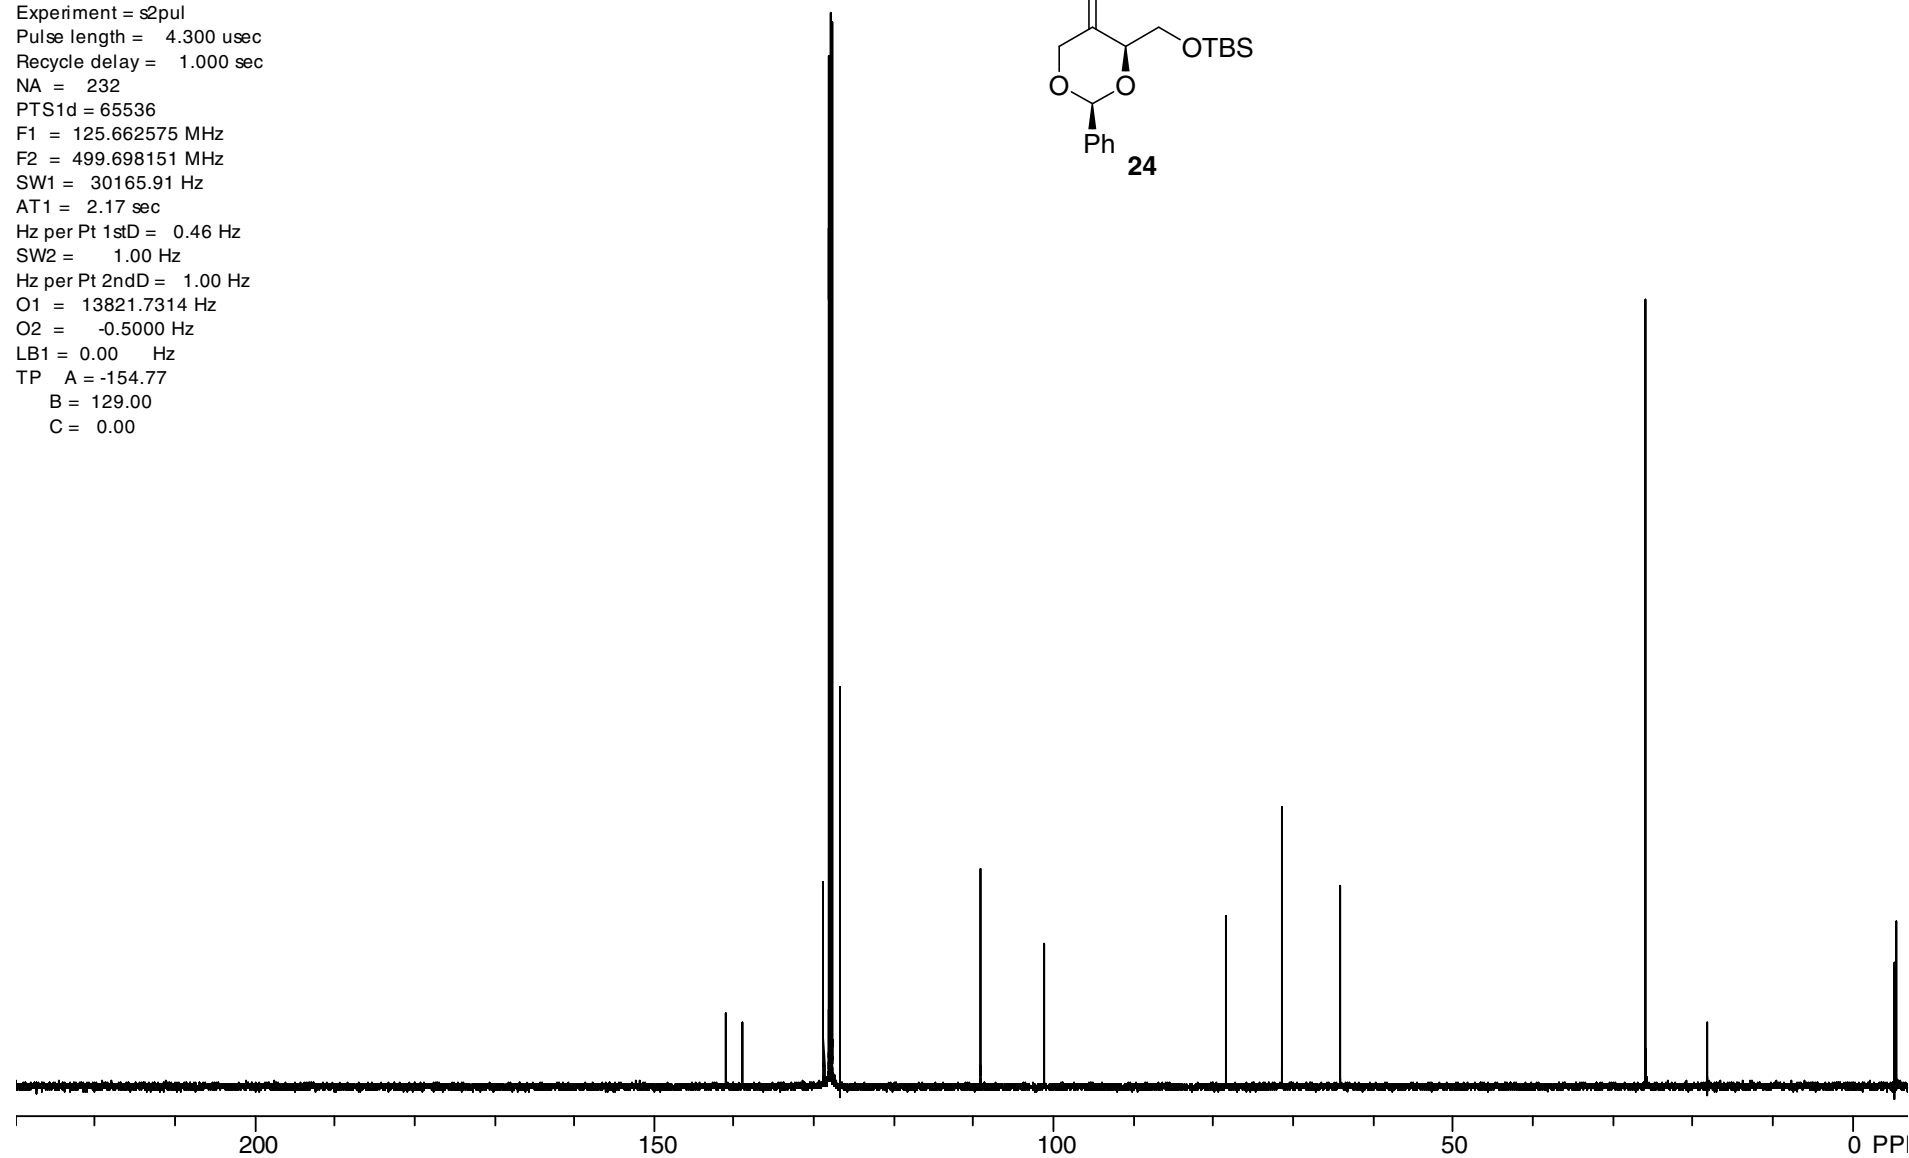

C:\Program Files\NUTS\data\1c-02-79-lower-epox-12-09-04-1H.fid

1c-02-79-lower-epox-12-09-04-1H

Dec 9 2004

USER:

SOLVENT: Benzene

Experiment = s2pul

Pulse length = 8.975 usec

Recycle delay = 0.000 sec

NA = 32

PTS1d = 65536

F1 = 399.950714 MHz

F2 = 399.951141 MHz

SW1 = 8000.00 Hz

AT1 = 8.19 sec

Hz per Pt 1stD = 0.12 Hz

SW2 = 1.00 Hz

Hz per Pt 2ndD = 1.00 Hz

O1 = 1999.7439 Hz

O2 = -0.5000 Hz

LB1 = 0.00 Hz

TP A = 149.13

B = 58.00

C = 0.00

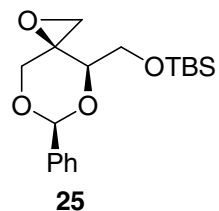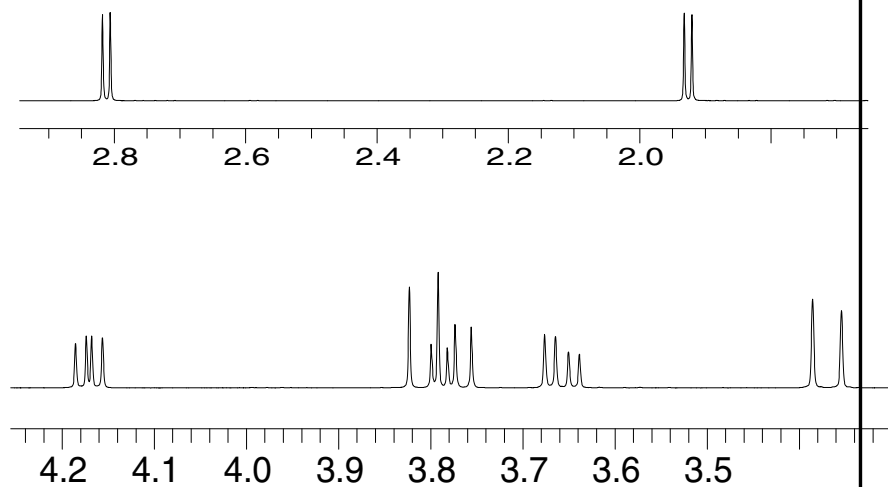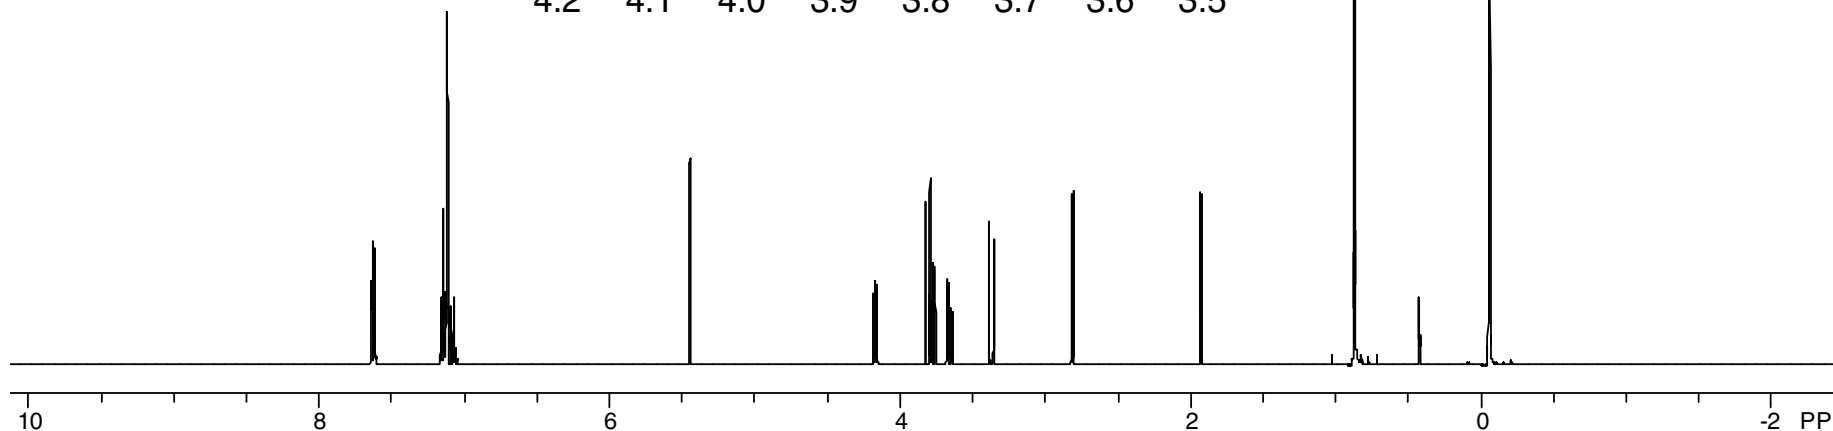

C:\Program Files\NUTS\DATA\lc-02-79-lower-epox-12-09-04-13C.fid

lc-02-79-lower-epox-12-09-04-13C

Dec 9 2004

USER:

SOLVENT: Benzene

Experiment = s2pul

Pulse length = 7.075 usec

Recycle delay = 1.000 sec

NA = 248

PTS1d = 65536

F1 = 100.578751 MHz

F2 = 399.950043 MHz

SW1 = 25000.00 Hz

AT1 = 2.62 sec

Hz per Pt 1stD = 0.38 Hz

SW2 = 1.00 Hz

Hz per Pt 2ndD = 1.00 Hz

O1 = 11589.9160 Hz

O2 = -0.5000 Hz

LB1 = 0.00 Hz

TP A = 62.54

B = 221.00

C = 0.00

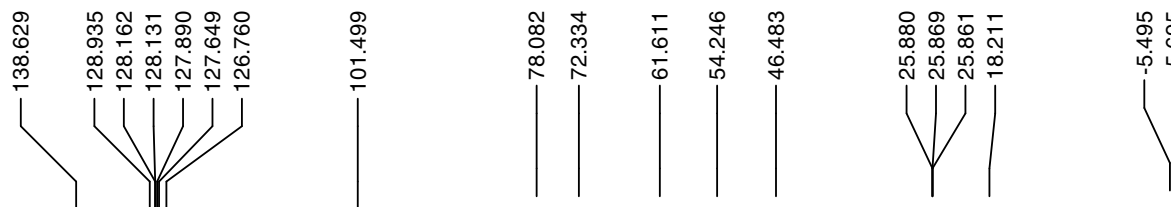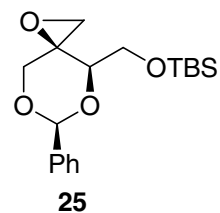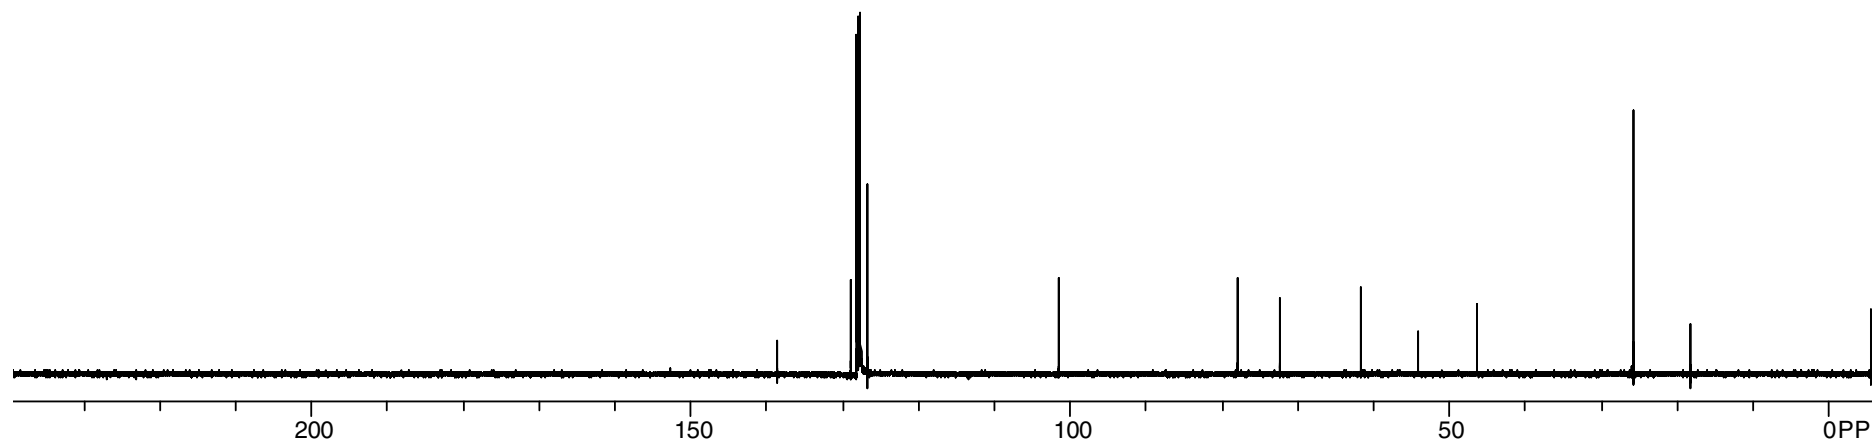

12-09-04-1H.fid

lc-02-79-upper-epox-12-09-04-1H

Dec 9 2004

USER:

SOLVENT: Benzene

Experiment = s2pul

Pulse length = 5.800 usec

Recycle delay = 0.000 sec

NA = 16

PTS1d = 65536

F1 = 499.698975 MHz

F2 = 499.698975 MHz

SW1 = 7024.94 Hz

AT1 = 9.33 sec

Hz per Pt 1stD = 0.11 Hz

SW2 = 1.00 Hz

Hz per Pt 2ndD = 1.00 Hz

O1 = 2517.8965 Hz

O2 = -0.5000 Hz

LB1 = 0.00 Hz

TP A = 124.60

B = 4.00

C = 0.00

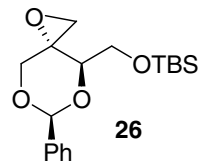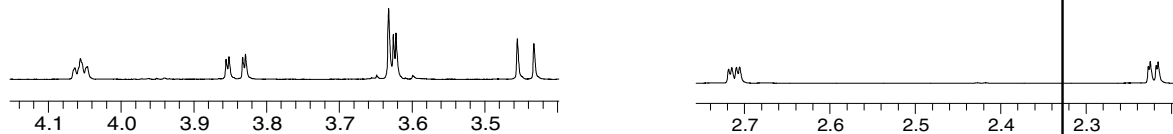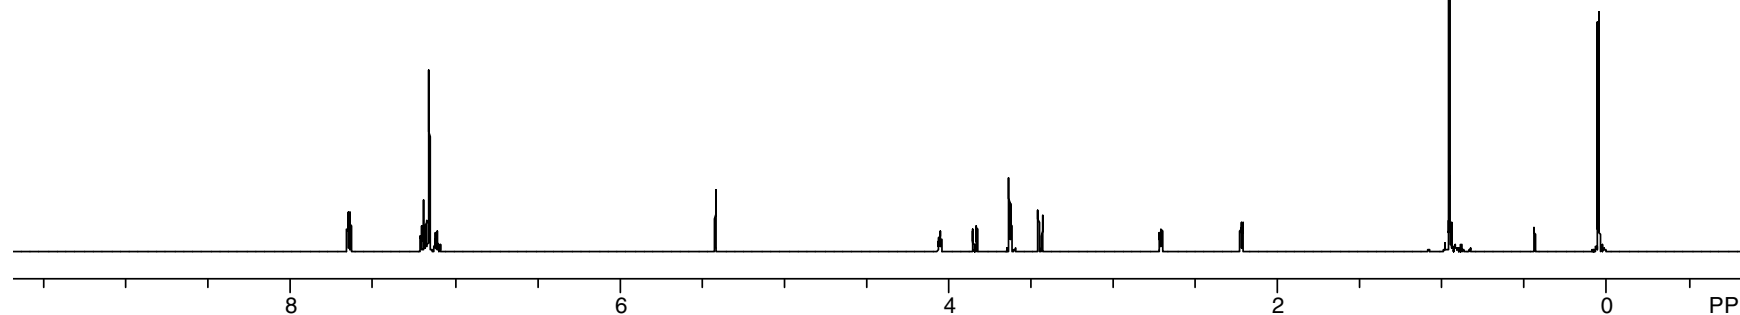

09-04-13C-2.fid Files\NUTS\DATA\11-02-75-11-09-04-13C-2.fid

STANDARD CARBON PARAMETERS

Dec 9 2004

USER:

SOLVENT: Benzene

Experiment = s2pul

Pulse length = 4.300 usec

Recycle delay = 1.000 sec

NA = 106

PTS1d = 65536

F1 = 125.662575 MHz

F2 = 499.698151 MHz

SW1 = 30165.91 Hz

AT1 = 2.17 sec

Hz per Pt 1stD = 0.46 Hz

SW2 = 1.00 Hz

Hz per Pt 2ndD = 1.00 Hz

O1 = 13821.7314 Hz

O2 = -0.5000 Hz

LB1 = 0.00 Hz

TP A = -159.11

B = 134.00

C = 0.00

79.593

71.237

61.314

52.055

51.716

25.883

25.870

25.861

18.352

-5.218

-5.201

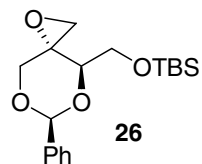

26

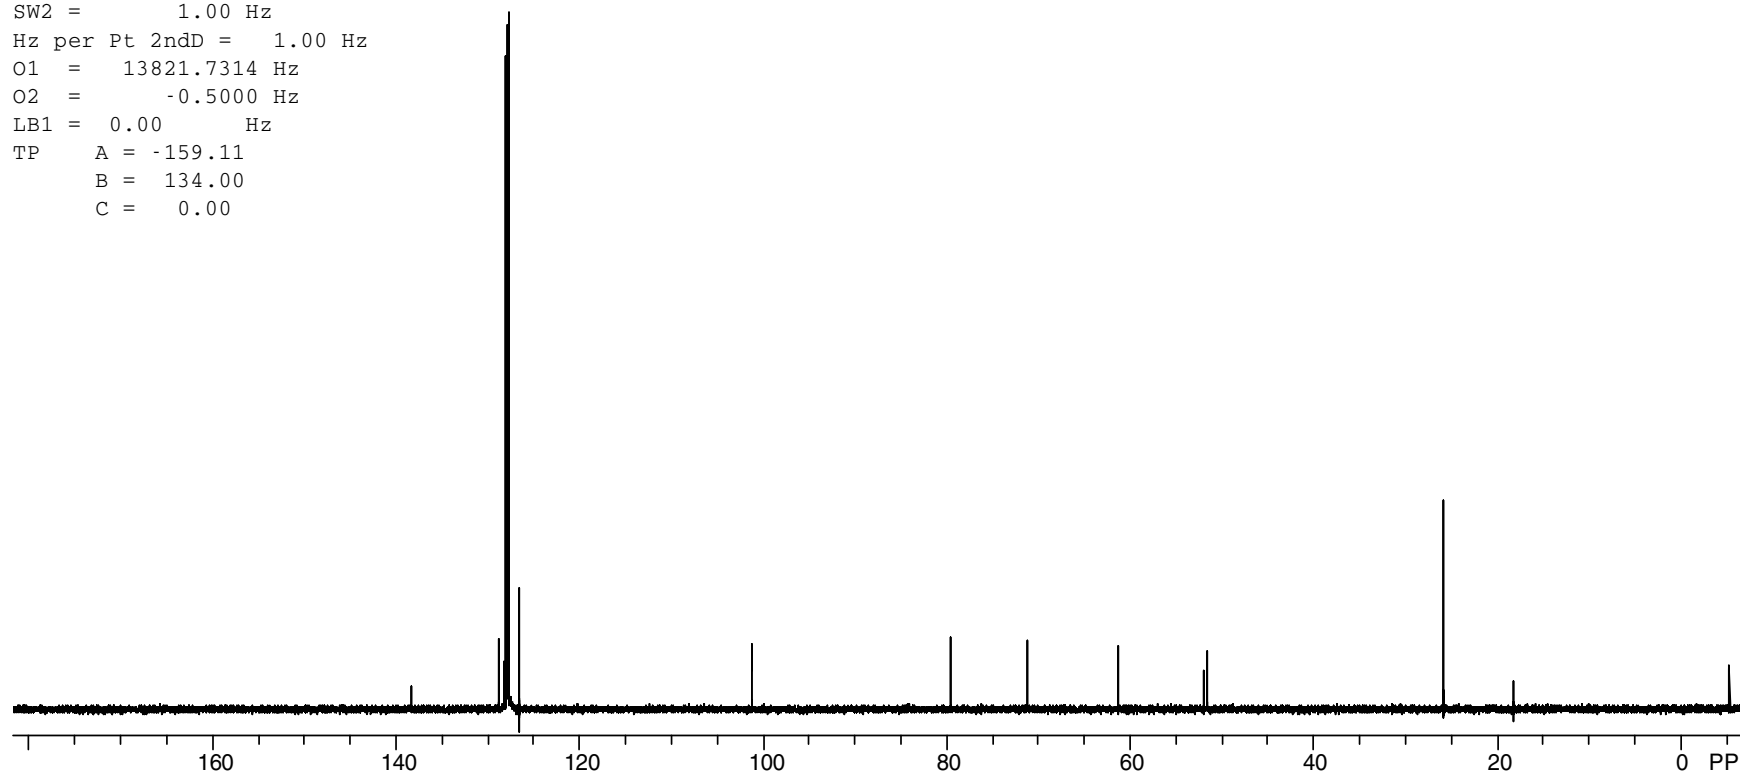

C:\Program Files\NUTS\DATA\1c-02-82-LAH=threo-diol-12-16-04-1H.fid

1c-02-82-LAH=threo-diol-12-16-04-1H

Dec 16 2004

USER:

SOLVENT: Benzene

Experiment = s2pul

Pulse length = 8.975 usec

Recycle delay = 0.000 sec

NA = 8

PTS1d = 65536

F1 = 399.950714 MHz

F2 = 399.951141 MHz

SW1 = 8000.00 Hz

AT1 = 8.19 sec

Hz per Pt 1stD = 0.12 Hz

SW2 = 1.00 Hz

Hz per Pt 2ndD = 1.00 Hz

O1 = 2017.5828 Hz

O2 = -0.5000 Hz

LB1 = 0.00 Hz

TP A = 148.74

B = 59.00

C = 0.00

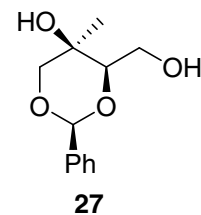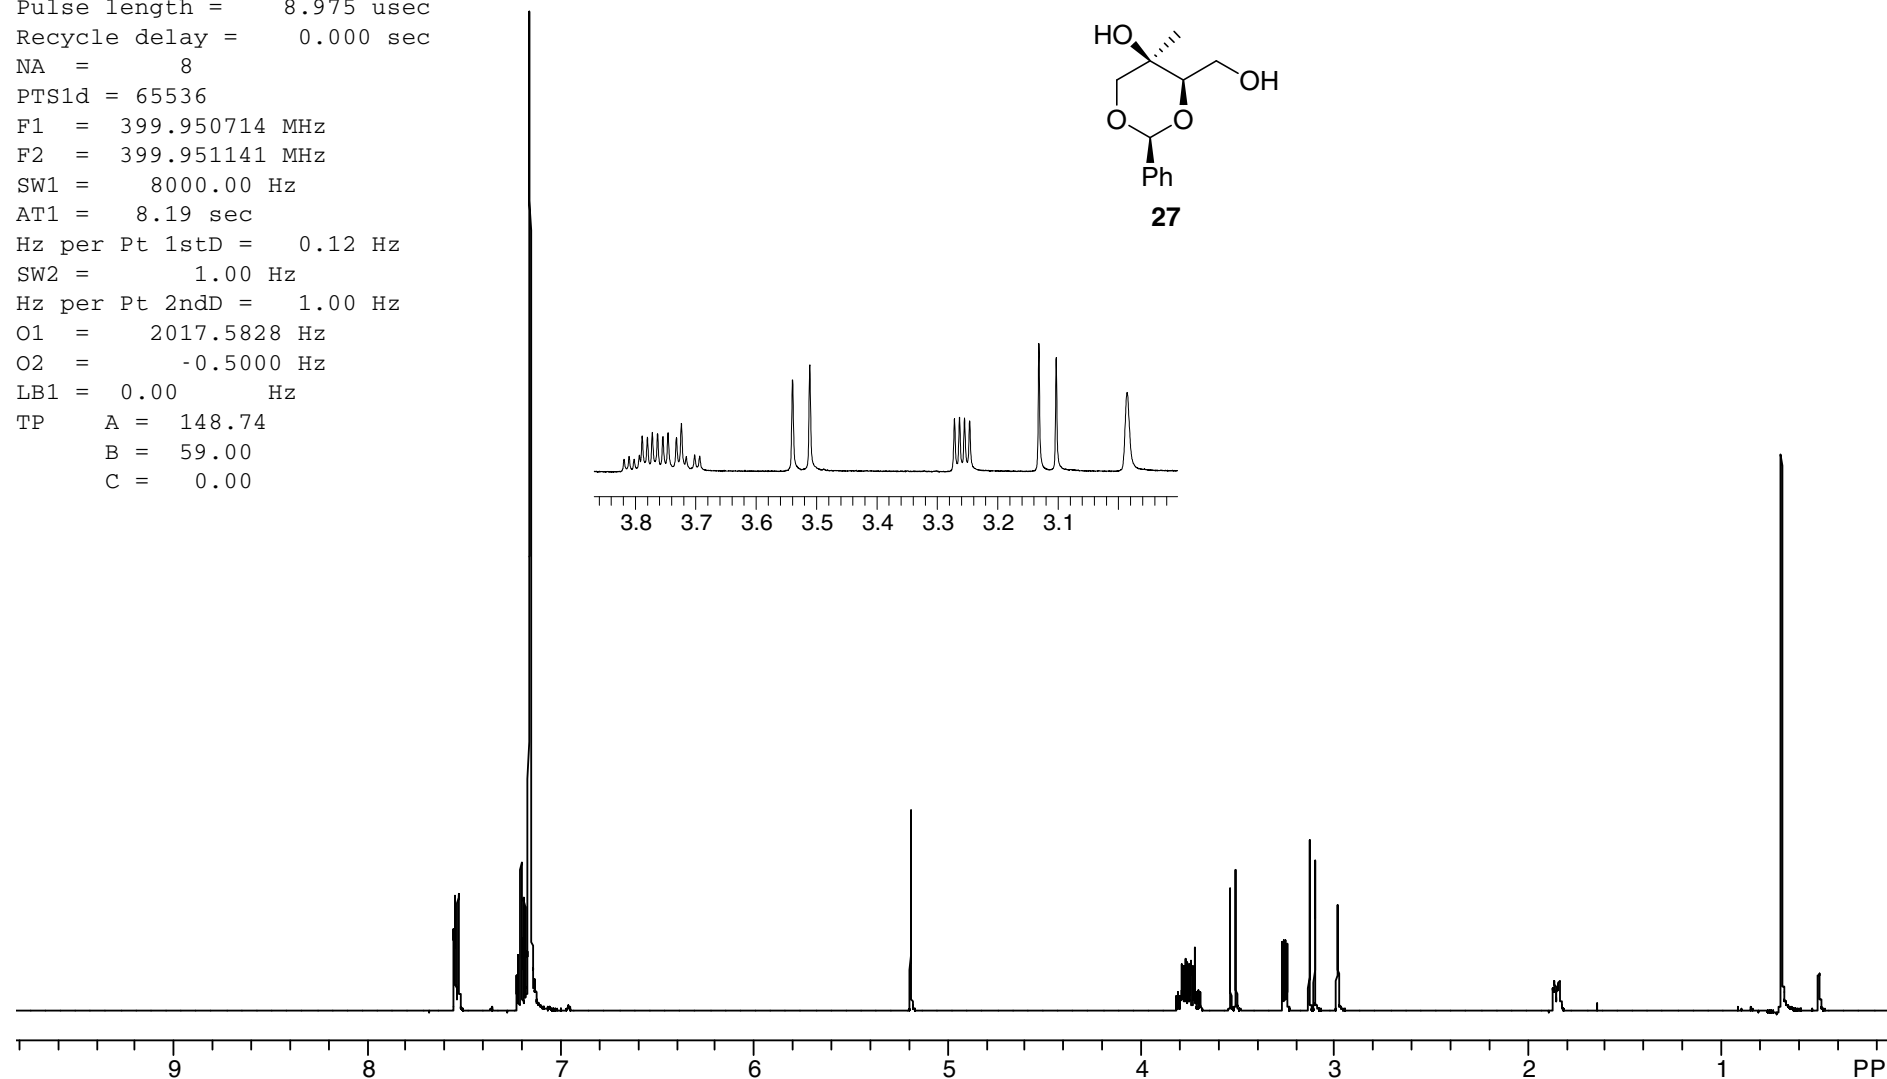



C:\Program Files\NUTS\data\5c-02-83-lah-threo-12-16-04-13C.fid

5c-02-83-lah-threo-12-16-04-13C

Dec 16 2004

USER:

SOLVENT: Benzene

Experiment = s2pul

Pulse length = 7.075 usec

Recycle delay = 1.000 sec

NA = 279

PTS1d = 65536

F1 = 100.578751 MHz

F2 = 399.950043 MHz

SW1 = 25000.00 Hz

AT1 = 2.62 sec

Hz per Pt 1stD = 0.38 Hz

SW2 = 1.00 Hz

Hz per Pt 2ndD = 1.00 Hz

O1 = 11589.9160 Hz

O2 = -0.5000 Hz

LB1 = 0.00 Hz

TP A = 70.84

B = 207.00

C = 0.00

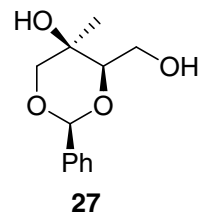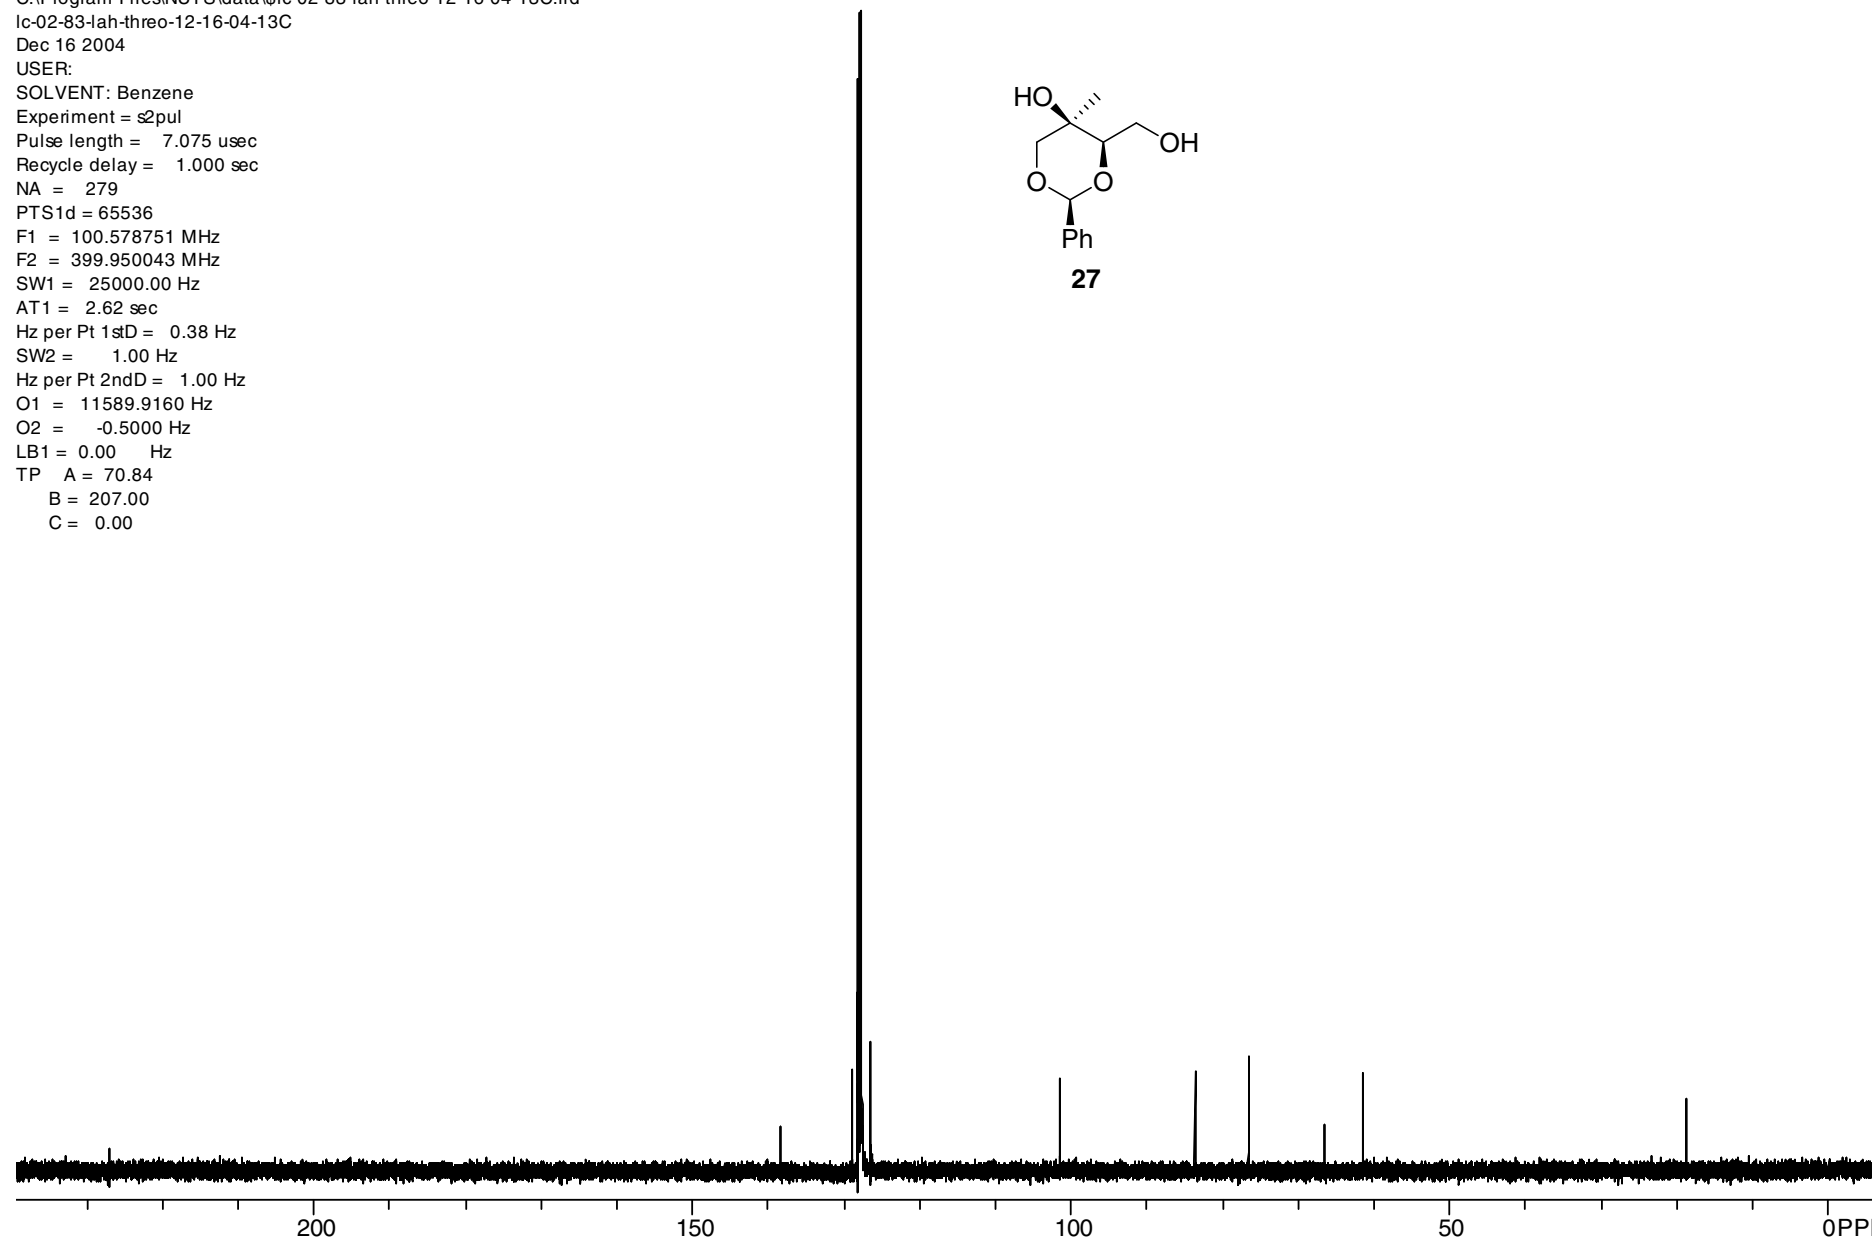

C:\Program Files\NUTS\DATA\1c-02-88-threio-tetrol-12-21-04-1H.fid

1c-02-88-threio-tetrol-12-21-04-1H

Dec 21 2004

USER:

SOLVENT: D2O

Experiment = s2pul

Pulse length = 5.800 usec

Recycle delay = 0.000 sec

NA = 16

PTS1d = 65536

F1 = 499.700226 MHz

F2 = 499.700226 MHz

SW1 = 7024.94 Hz

AT1 = 9.33 sec

Hz per Pt 1stD = 0.11 Hz

SW2 = 1.00 Hz

Hz per Pt 2ndD = 1.00 Hz

O1 = 2496.0183 Hz

O2 = -0.5000 Hz

LB1 = 0.00 Hz

TP A = 143.85

B = 6.00

C = 0.00

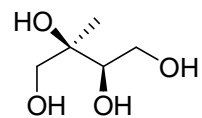

**28**

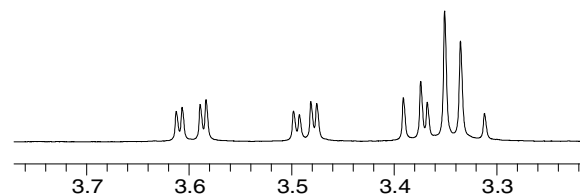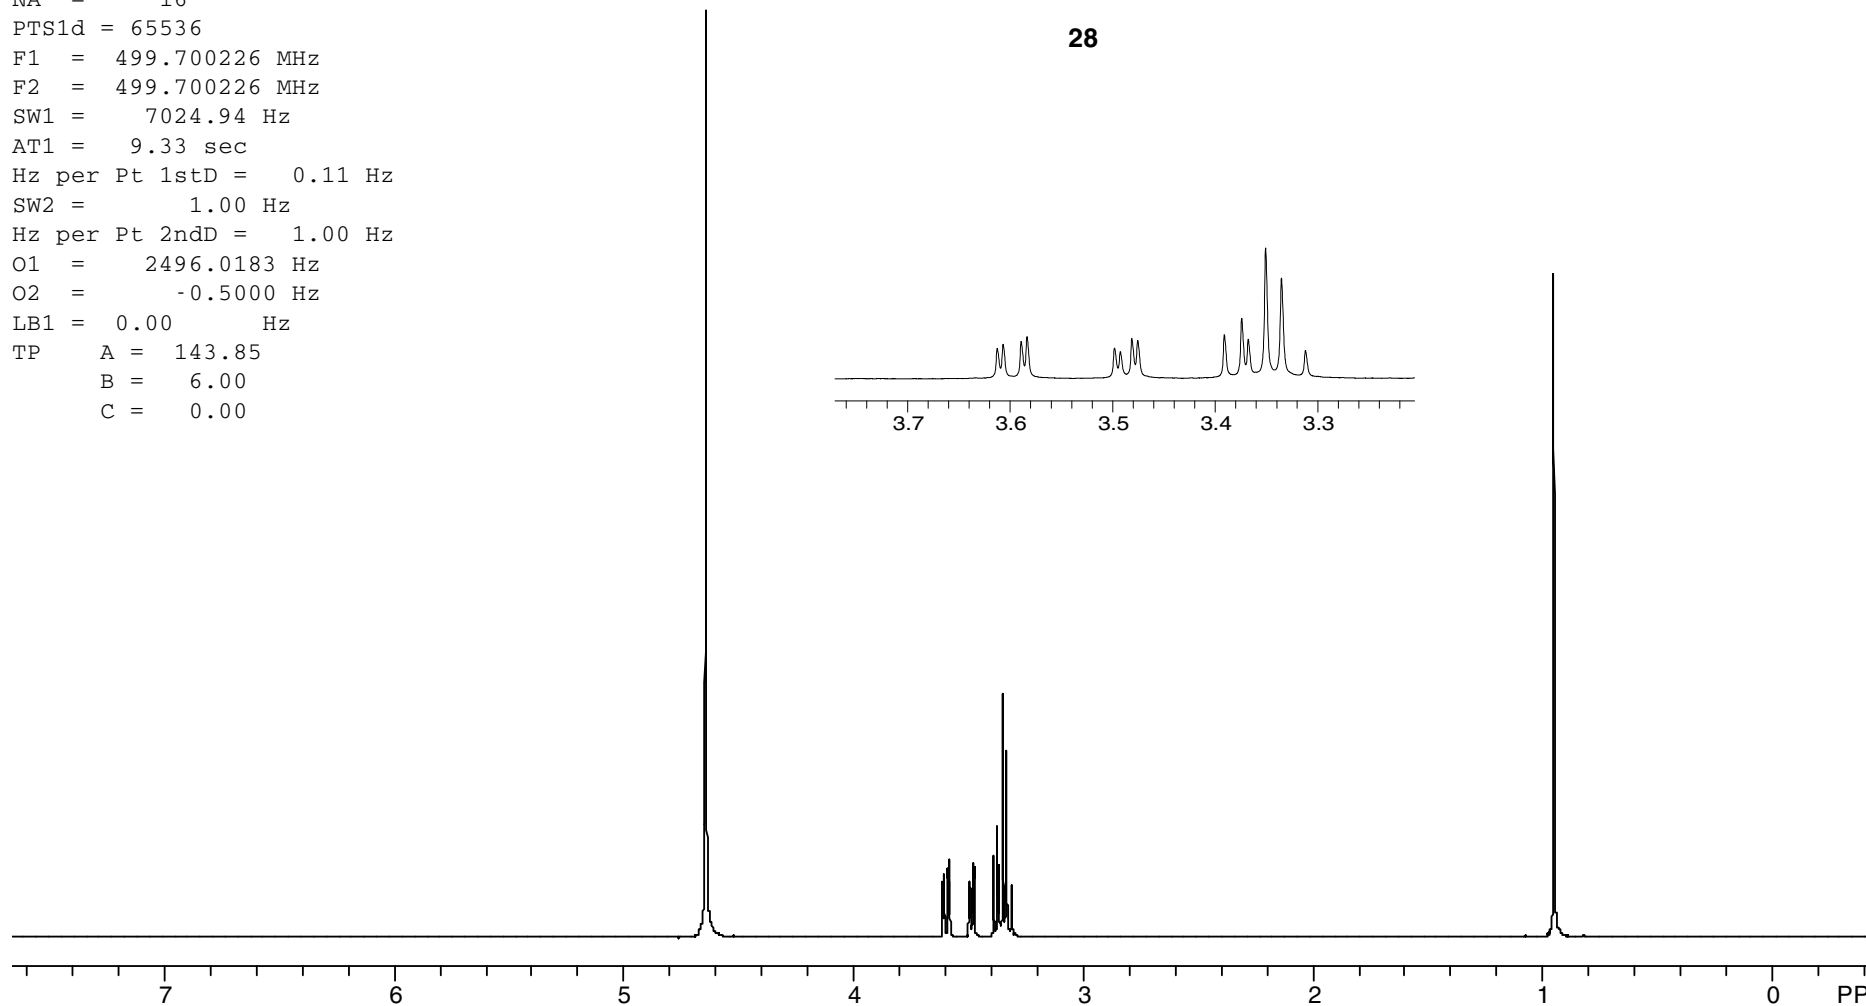

C:\Program Files\NUTS\DATA\1c-02-86-threio-tetrol-12-21-04-13C.fid

1c-02-86-threio-tetrol-12-21-04-13C

Dec 21 2004

USER:

SOLVENT: D2O

Experiment = s2pul

Pulse length = 4.300 usec

Recycle delay = 1.000 sec

NA = 483

PTS1d = 65536

F1 = 125.662888 MHz

F2 = 499.699402 MHz

SW1 = 30165.91 Hz

AT1 = 2.17 sec

Hz per Pt 1stD = 0.46 Hz

SW2 = 1.00 Hz

Hz per Pt 2ndD = 1.00 Hz

O1 = 13821.7246 Hz

O2 = -0.5000 Hz

LB1 = 0.00 Hz

TP A = 21.20

B = 117.00

C = 0.00

75.172  
74.192

66.197

61.935

19.162

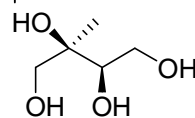

28

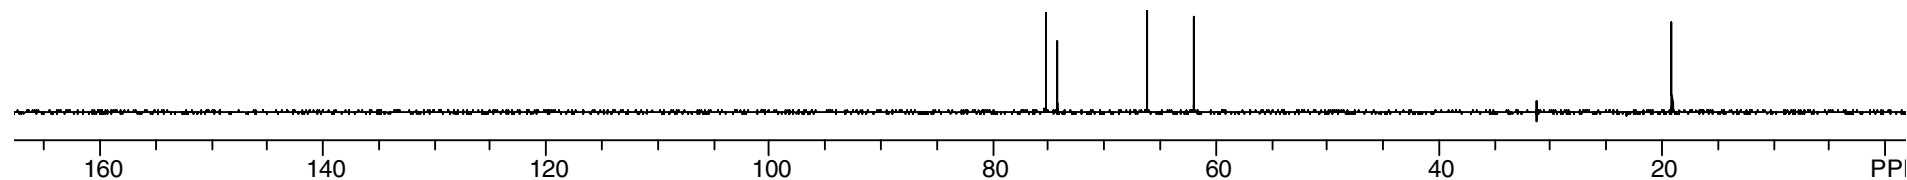

C:\Program Files\NUTS\DATA\1c-02-threio-dibenzylphosph-1-4-04=1h.fid

STANDARD PROTON PARAMETERS

Jan 4 2005

USER:

SOLVENT: Benzene

Experiment = s2pul

Pulse length = 5.800 usec

Recycle delay = 0.000 sec

NA = 4

PTS1d = 65536

F1 = 499.698975 MHz

F2 = 499.698975 MHz

SW1 = 7024.94 Hz

AT1 = 9.33 sec

Hz per Pt 1stD = 0.11 Hz

SW2 = 1.00 Hz

Hz per Pt 2ndD = 1.00 Hz

O1 = 2517.0835 Hz

O2 = -0.5000 Hz

LB1 = 0.00 Hz

TP A = 108.30

B = 2.00

C = 0.00

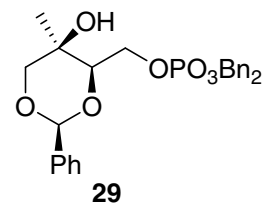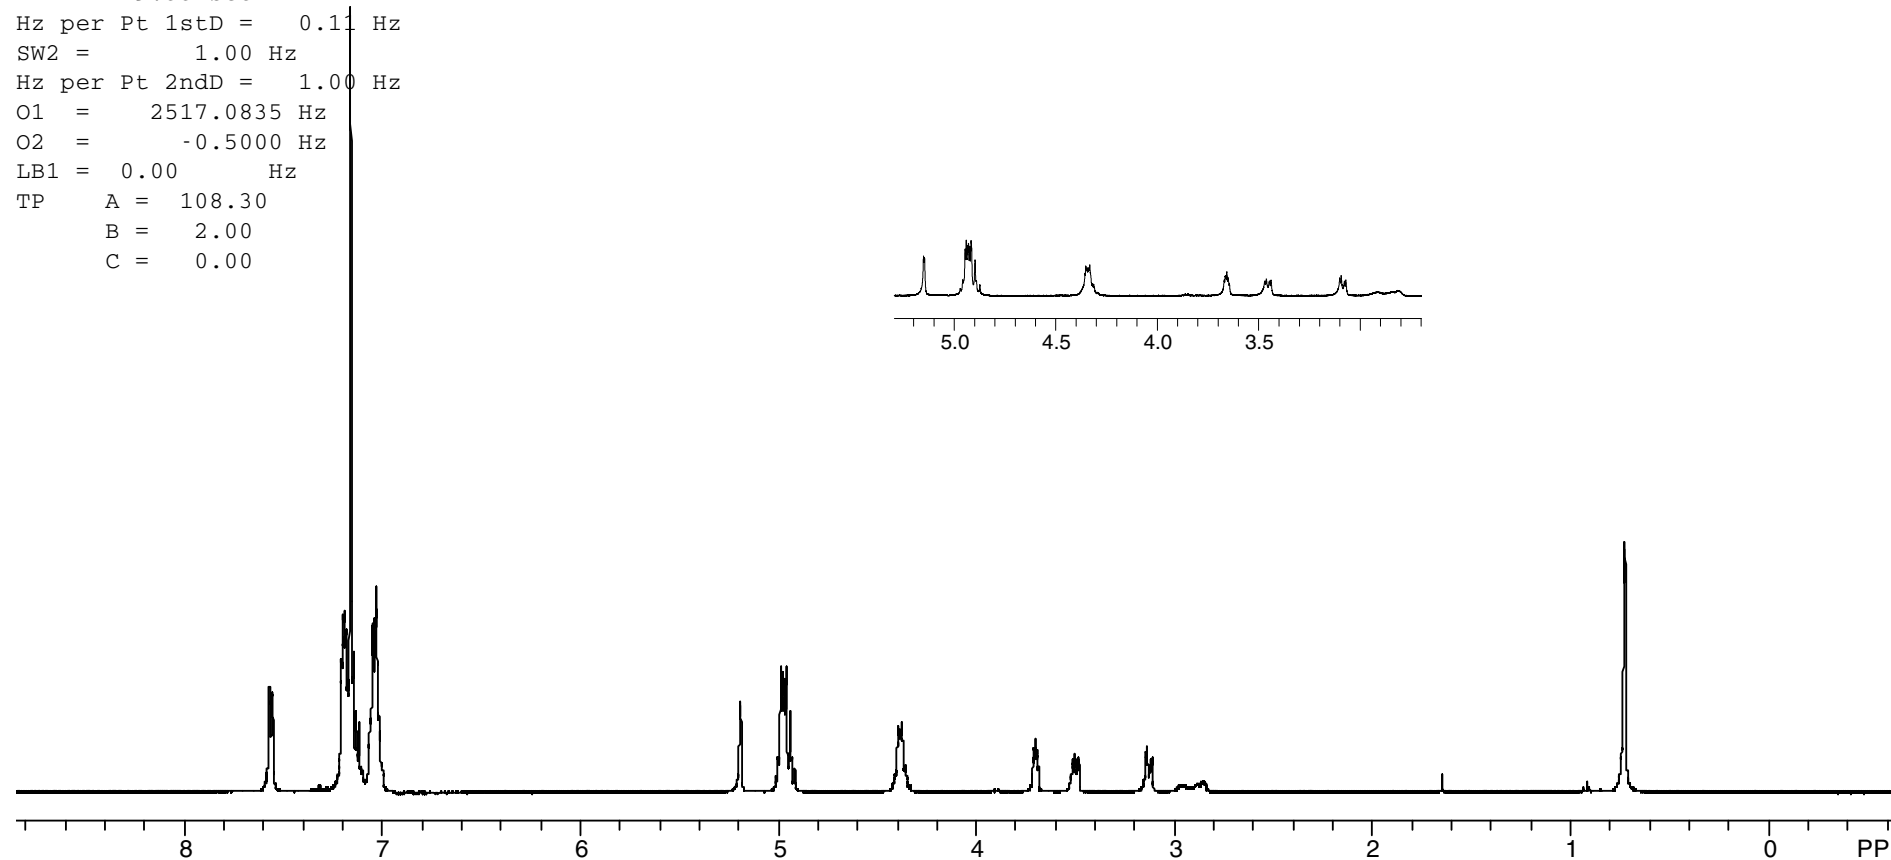

C:\Program Files\NUTS\DATA\1c-02-threio-dibenzylphospho-mono-1-4-05-13C.fid

STANDARD CARBON PARAMETERS

Jan 4 2005

USER:

SOLVENT: Benzene

Experiment = s2pul

Pulse length = 4.300 usec

Recycle delay = 1.000 sec

NA = 363

PTS1d = 65536

F1 = 125.662575 MHz

F2 = 499.698151 MHz

SW1 = 30165.91 Hz

AT1 = 2.17 sec

Hz per Pt 1stD = 0.46 Hz

SW2 = 1.00 Hz

Hz per Pt 2ndD = 1.00 Hz

O1 = 13821.7314 Hz

O2 = -0.5000 Hz

LB1 = 0.00 Hz

TP A = 188.89

B = 134.00

C = 0.00

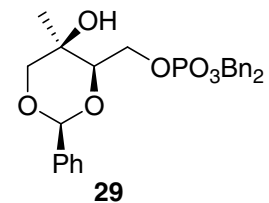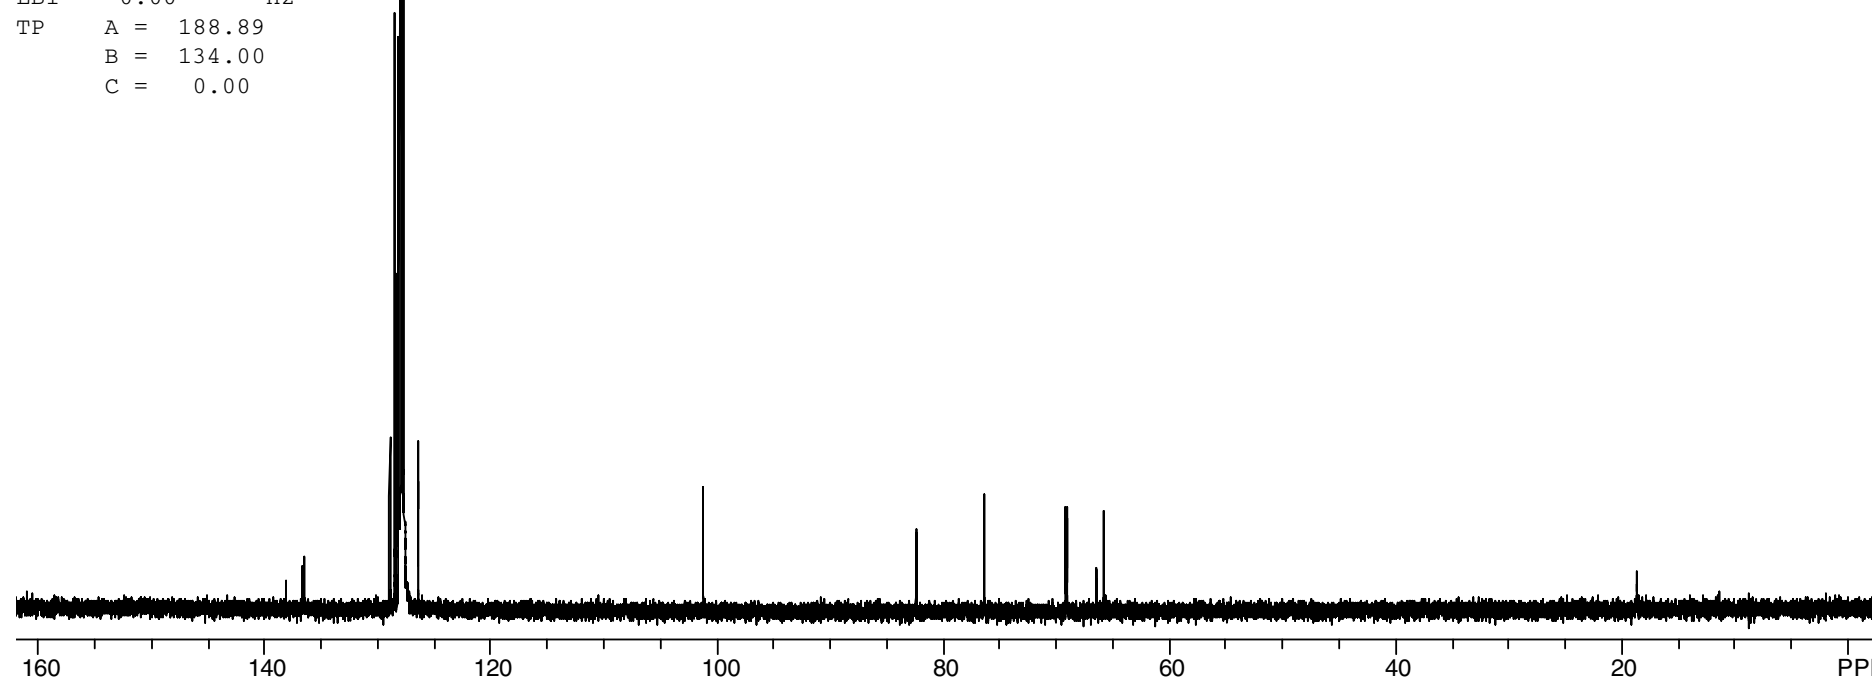

C:\Program Files\NUTS\data\1c-02-91-threio-4-phospho-ammon-1-4-05-1H.fid

1c-02-91-threio-4-phospho-ammon-1-4-05-1H

Jan 4 2005

USER:

SOLVENT: D2O

Experiment = s2pul

Pulse length = 5.800 usec

Recycle delay = 0.000 sec

NA = 8

PTS1d = 65536

F1 = 499.700226 MHz

F2 = 499.700226 MHz

SW1 = 7024.94 Hz

AT1 = 9.33 sec

Hz per Pt 1stD = 0.11 Hz

SW2 = 1.00 Hz

Hz per Pt 2ndD = 1.00 Hz

O1 = 2496.0183 Hz

O2 = -0.5000 Hz

LB1 = 0.00 Hz

TP A = 140.65

B = 14.00

C = 0.00

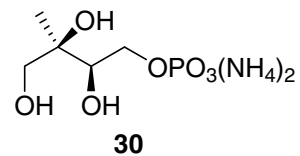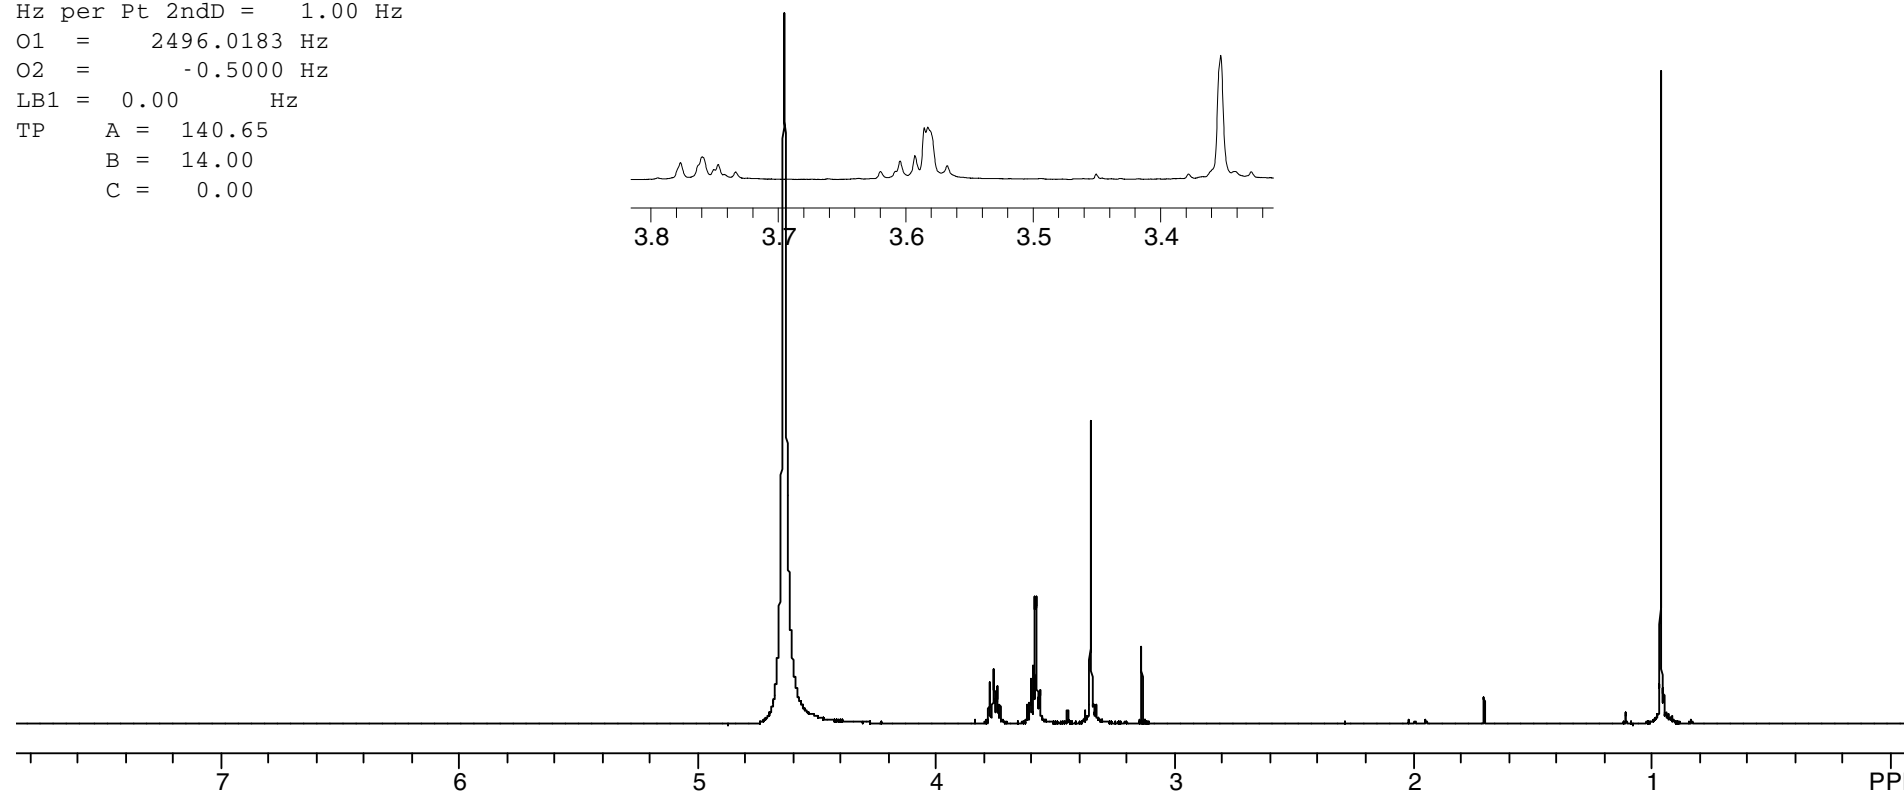

C:\Program Files\NUTS\data\1c-02-91-threio-4-phosphoammo-1-4-04-13C.fid

STANDARD CARBON PARAMETERS

Jan 4 2005

USER:

SOLVENT: D2O

Experiment = s2pul

Pulse length = 4.300 usec

Recycle delay = 1.000 sec

NA = 396

PTS1d = 65536

F1 = 125.662888 MHz

F2 = 499.699402 MHz

SW1 = 30165.91 Hz

AT1 = 2.17 sec

Hz per Pt 1stD = 0.46 Hz

SW2 = 1.00 Hz

Hz per Pt 2ndD = 1.00 Hz

O1 = 13821.7246 Hz

O2 = -0.5000 Hz

LB1 = 0.00 Hz

TP A = 53.24

B = 69.00

C = 0.00

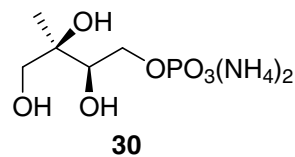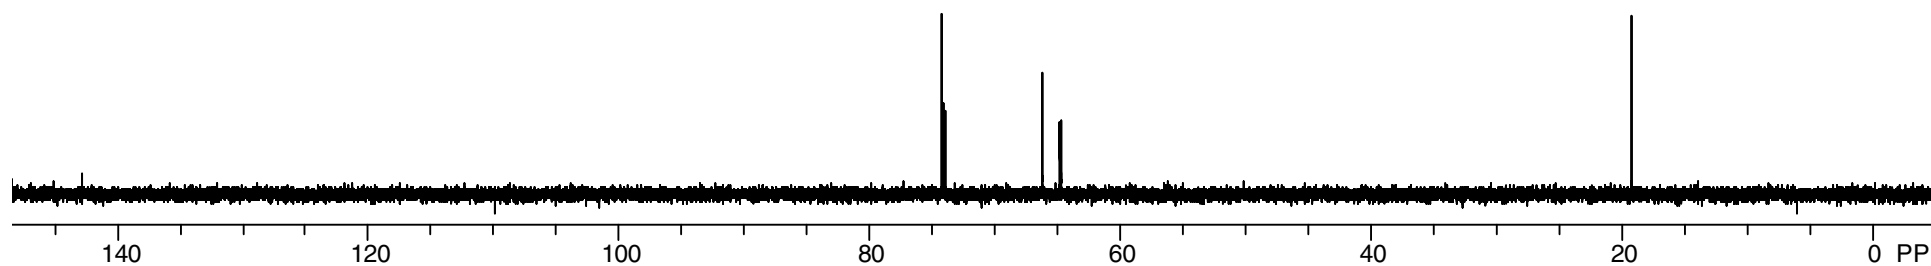

C:\Program Files\NUTS\data\5lc-02-91-threio-4-phosphoammo-1-4-04-31P.fid

P31 TRIPHENYLPHOSPHATE PARAMETERS

Jan 4 2005

USER:

SOLVENT: D2O

Experiment = s2pul

Pulse length = 4.825 usec

Recycle delay = 1.000 sec

NA = 102

PTS1d = 65536

F1 = 202.284744 MHz

F2 = 499.699402 MHz

SW1 = 50000.00 Hz

AT1 = 1.31 sec

Hz per Pt 1stD = 0.76 Hz

SW2 = 1.00 Hz

Hz per Pt 2ndD = 1.00 Hz

O1 = 3622.5781 Hz

O2 = -0.5000 Hz

LB1 = 0.00 Hz

TP A = 226.00

B = 0.00

C = 0.00

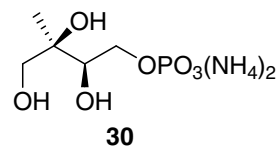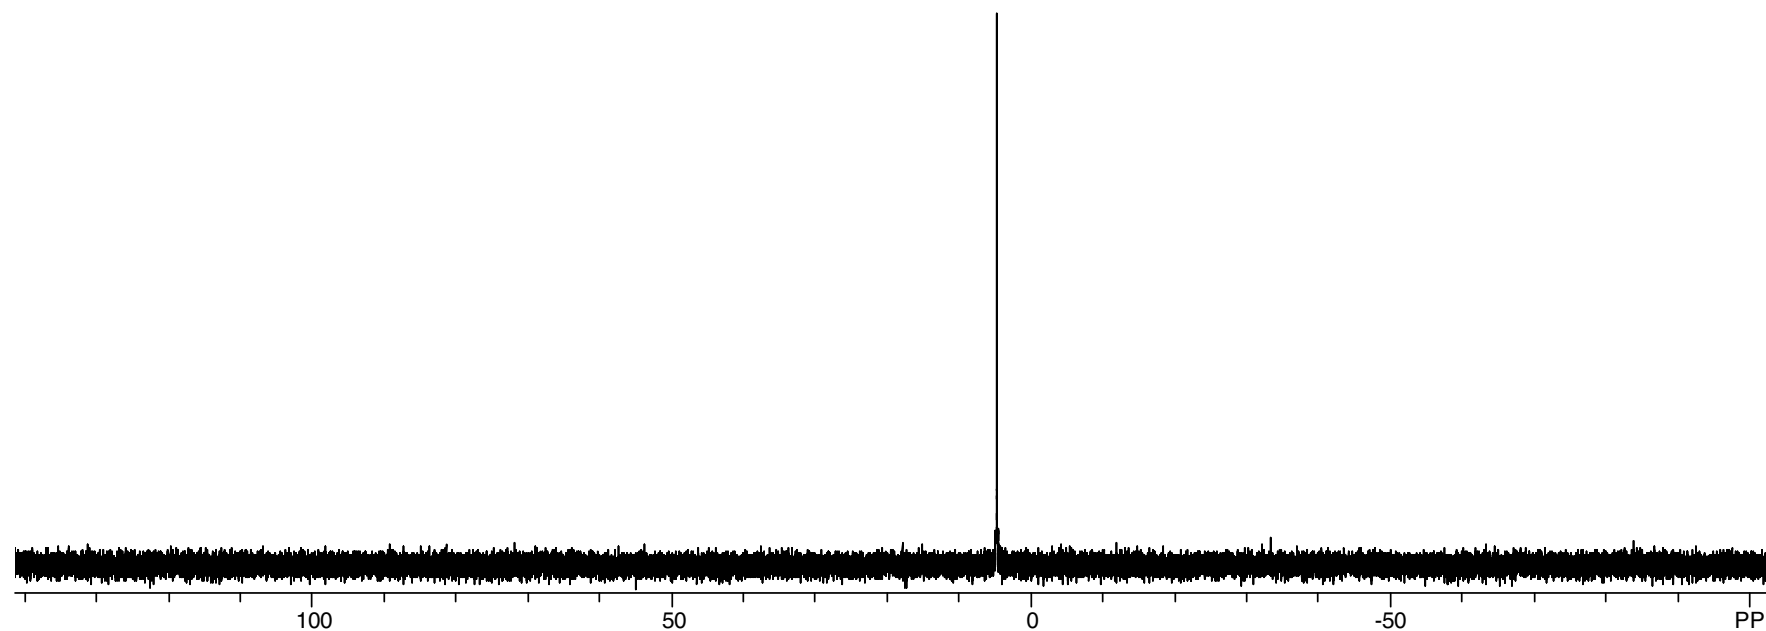



C:\Program Files\NUTS\DATA\threi-mono-cyclophos-5-27-07-1H.fid

threi-mono-cyclophos-5-27-07-1H

May 27 2007

USER:

SOLVENT: CDC13

Experiment = s2pul

Pulse length = 6.500 usec

Recycle delay = 0.000 sec

NA = 8

PTS1d = 65536

F1 = 499.698944 MHz

F2 = 499.698944 MHz

SW1 = 7024.94 Hz

AT1 = 9.33 sec

Hz per Pt 1stD = 0.11 Hz

SW2 = 1.00 Hz

Hz per Pt 2ndD = 1.00 Hz

O1 = 2496.0322 Hz

O2 = -0.5000 Hz

LB1 = 0.00 Hz

TP A = -123.75

B = 4.57

C = 0.00

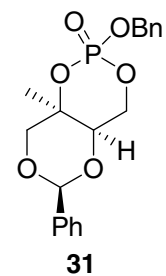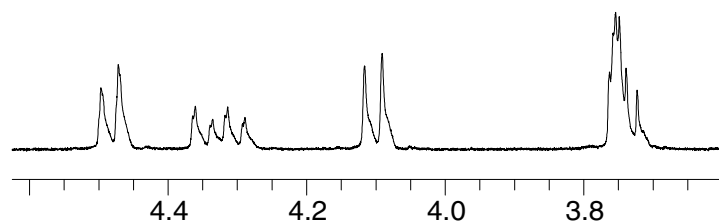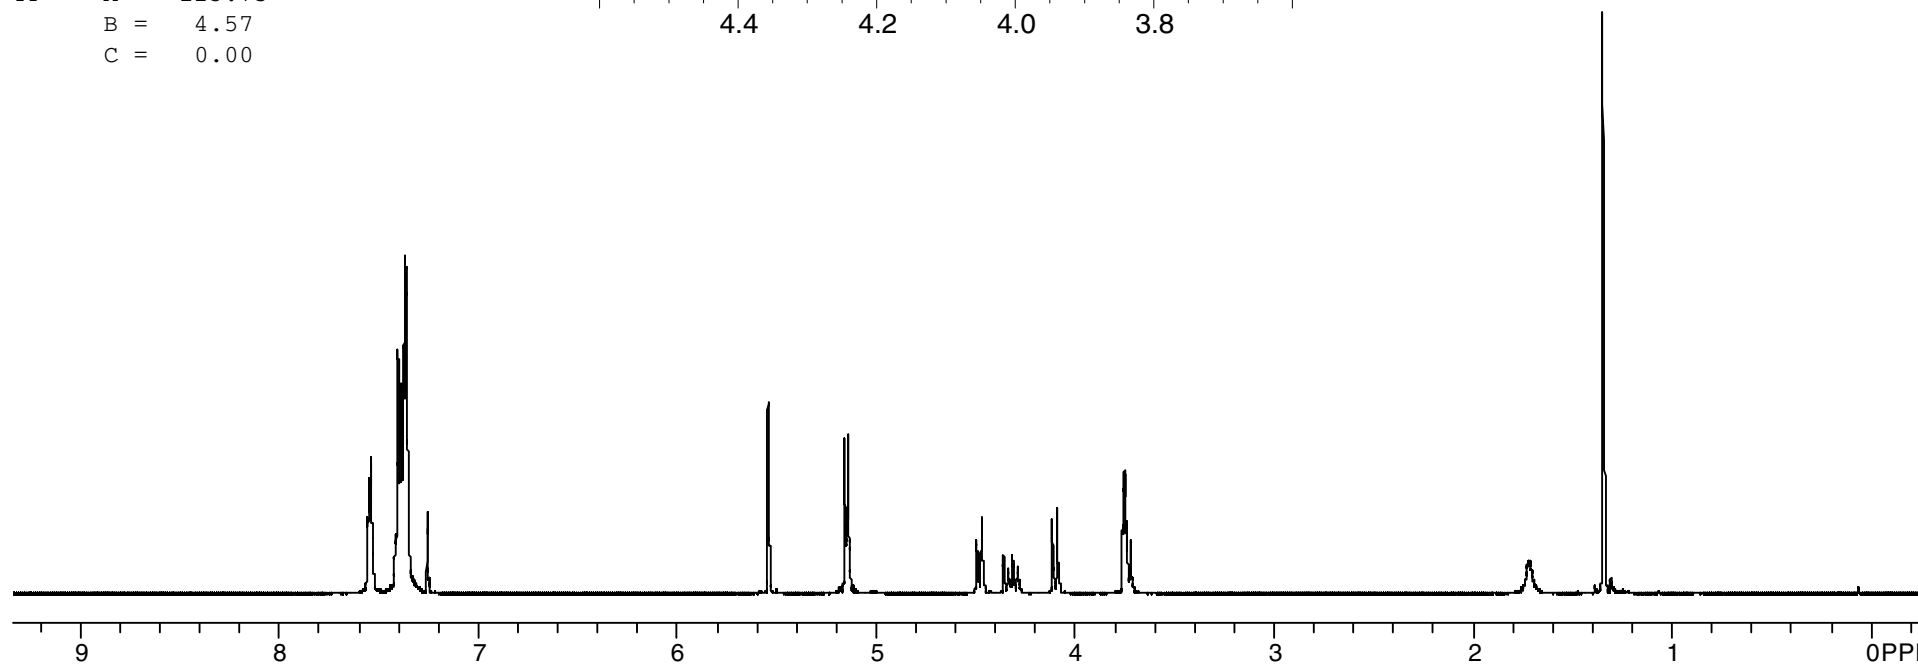

C:\Program Files\NUTS\DATA\threi-mono-cyclophos-5-27-07-13C.fid

threi-mono-cyclophos-5-27-07-13C

May 27 2007

USER:

SOLVENT: CDCl<sub>3</sub>

Experiment = s2pul

Pulse length = 6.000 usec

Recycle delay = 1.000 sec

NA = 558

PTS1d = 65536

F1 = 125.662560 MHz

F2 = 499.698120 MHz

SW1 = 30165.91 Hz

AT1 = 2.17 sec

Hz per Pt 1stD = 0.46 Hz

SW2 = 1.00 Hz

Hz per Pt 2ndD = 1.00 Hz

O1 = 13821.7402 Hz

O2 = -0.5000 Hz

LB1 = 0.00 Hz

TP A = -10.31

B = 125.16

C = 0.00

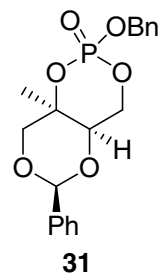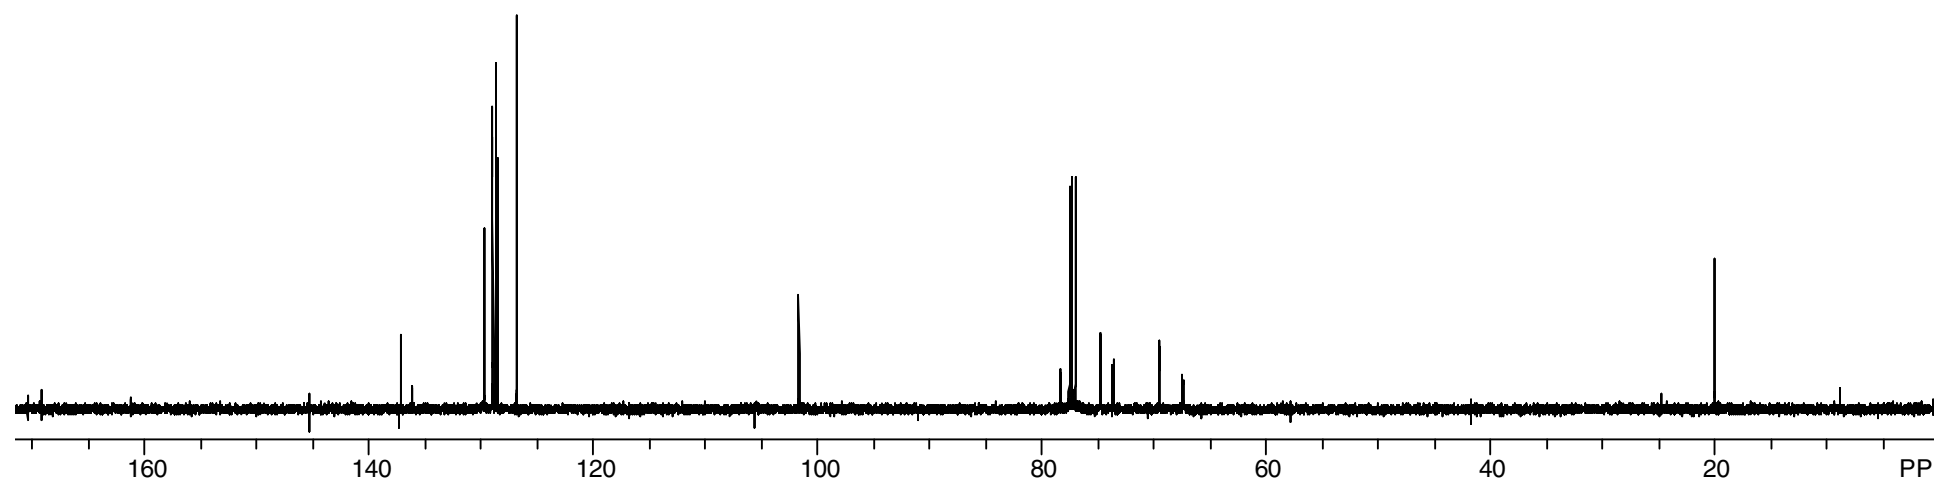

C:\Program Files\NUTS\DATA\\$threi-mono-cyclo-phos-5-27-07-31P.fid

threi-mono-cyclo-phos-5-27-07-31P

May 27 2007

USER:

SOLVENT: CDCl<sub>3</sub>

Experiment = s2pul

Pulse length = 3.875 usec

Recycle delay = 1.000 sec

NA = 32

PTS1d = 65536

F1 = 202.284225 MHz

F2 = 499.698120 MHz

SW1 = 50000.00 Hz

AT1 = 1.31 sec

Hz per Pt 1stD = 0.76 Hz

SW2 = 1.00 Hz

Hz per Pt 2ndD = 1.00 Hz

O1 = 3519.5469 Hz

O2 = -0.5000 Hz

LB1 = 0.00 Hz

TP A = 154.69

B = 35.16

C = 0.00

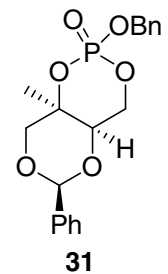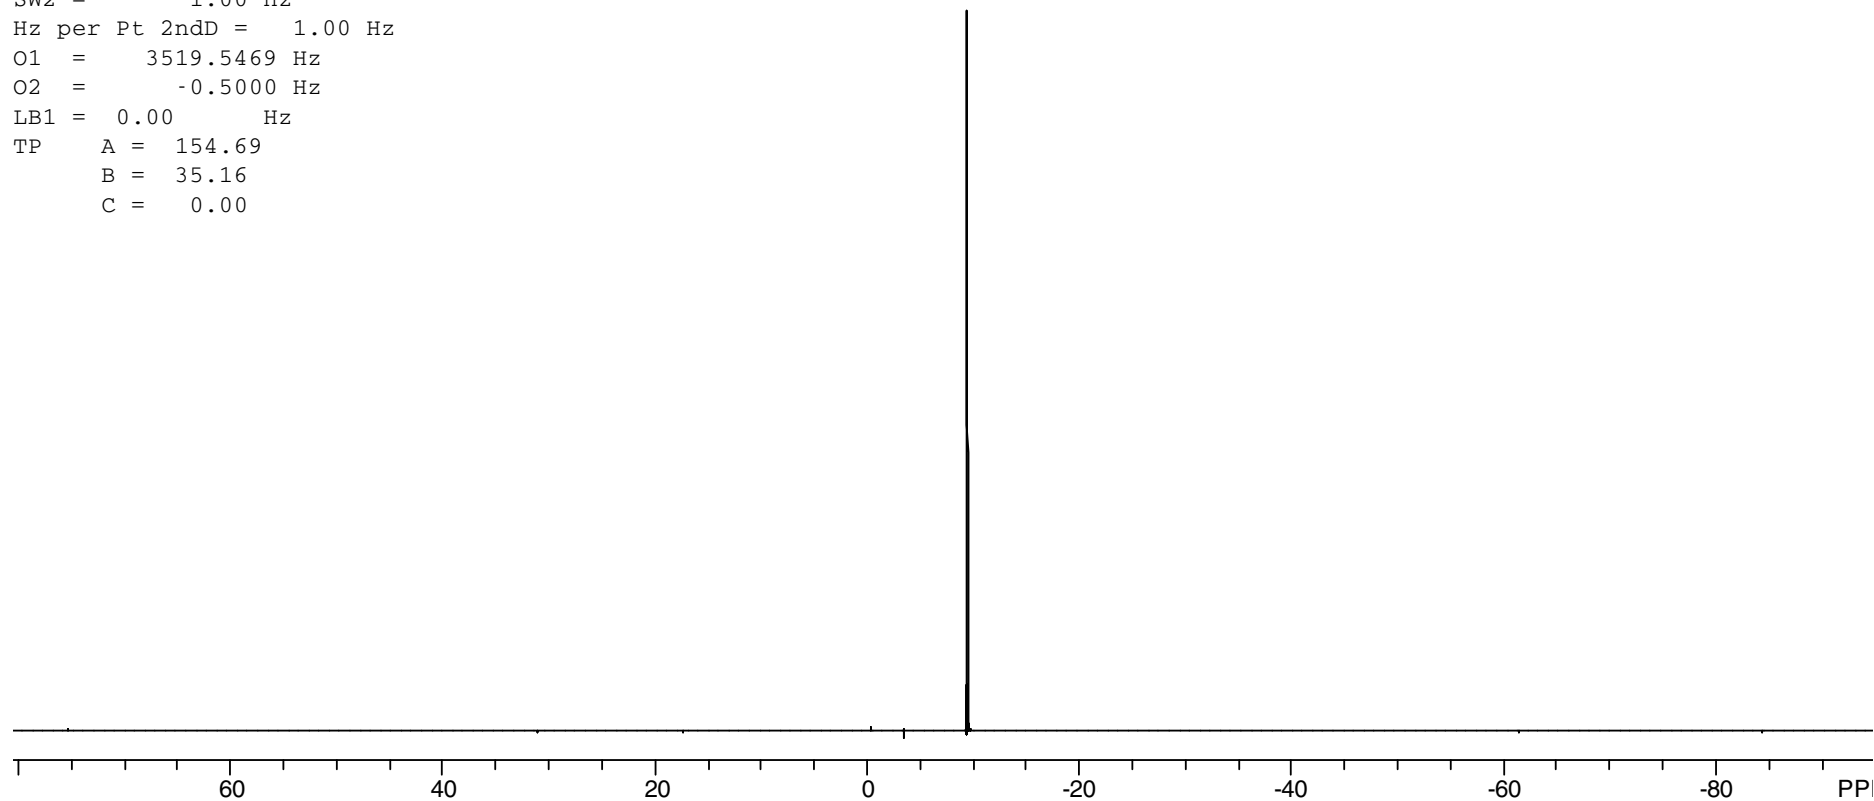

Program Files\NUTS\DATA\threi=bis-dibenz-phos-4-20-07-1H.fid

threi=bis-dibenz-phos-4-20-07-1H

Apr 20 2007

USER:

SOLVENT: Acetone

Experiment = s2pul

Pulse length = 6.500 usec

Recycle delay = 0.000 sec

NA = 32

PTS1d = 65536

F1 = 499.701538 MHz

F2 = 499.701538 MHz

SW1 = 7024.94 Hz

AT1 = 9.33 sec

Hz per Pt 1stD = 0.11 Hz

SW2 = 1.00 Hz

Hz per Pt 2ndD = 1.00 Hz

O1 = 2496.0129 Hz

O2 = -0.5000 Hz

LB1 = 0.00 Hz

TP A = 145.31

B = 5.63

C = 0.00

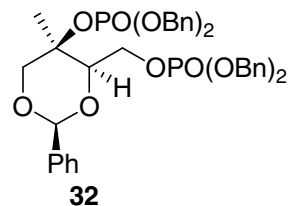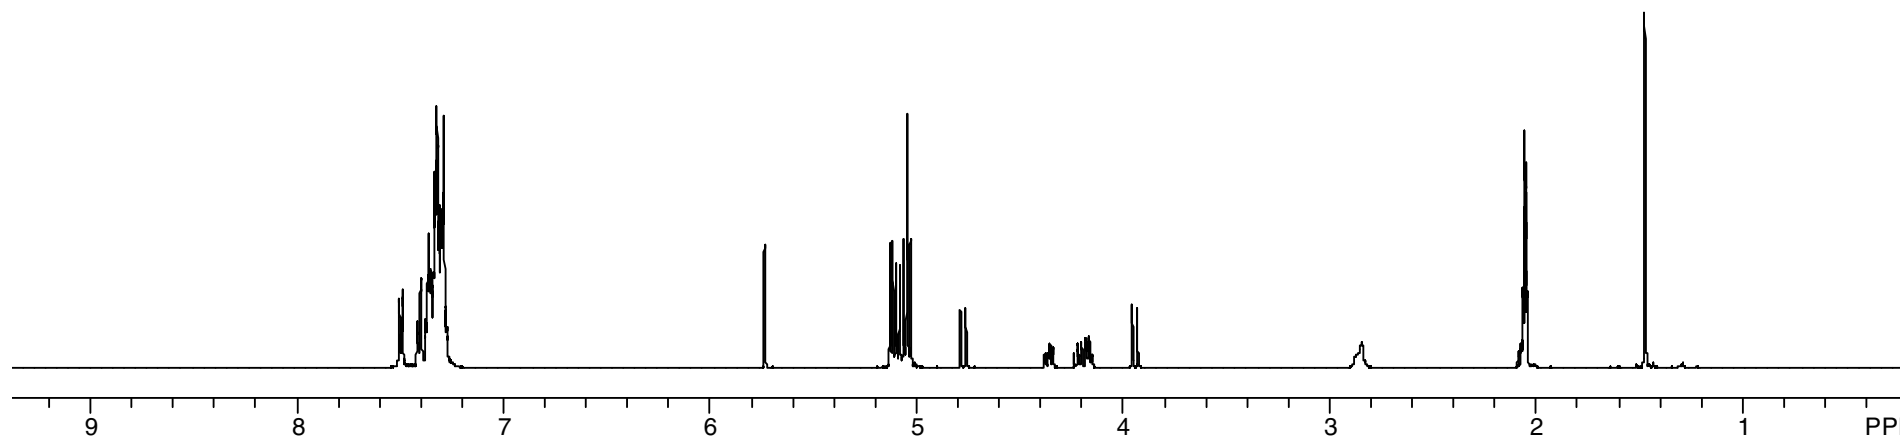

C:\Program Files\NUTS\DATA\sthrei=bis-dibenz-phos-4-20-07-13C.fid  
threi=bis-dibenz-phos-4-20-07-1C

Apr 20 2007

USER:

SOLVENT: Acetone

Experiment = s2pul

Pulse length = 6.000 usec

Recycle delay = 1.000 sec

NA = 512

PTS1d = 65536

F1 = 125.663216 MHz

F2 = 499.700714 MHz

SW1 = 30165.91 Hz

AT1 = 2.17 sec

Hz per Pt 1stD = 0.46 Hz

SW2 = 1.00 Hz

Hz per Pt 2ndD = 1.00 Hz

O1 = 13821.8242 Hz

O2 = -0.5000 Hz

LB1 = 0.00 Hz

TP A = 49.79

B = 149.00

C = 0.00

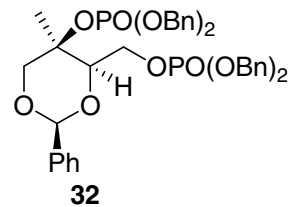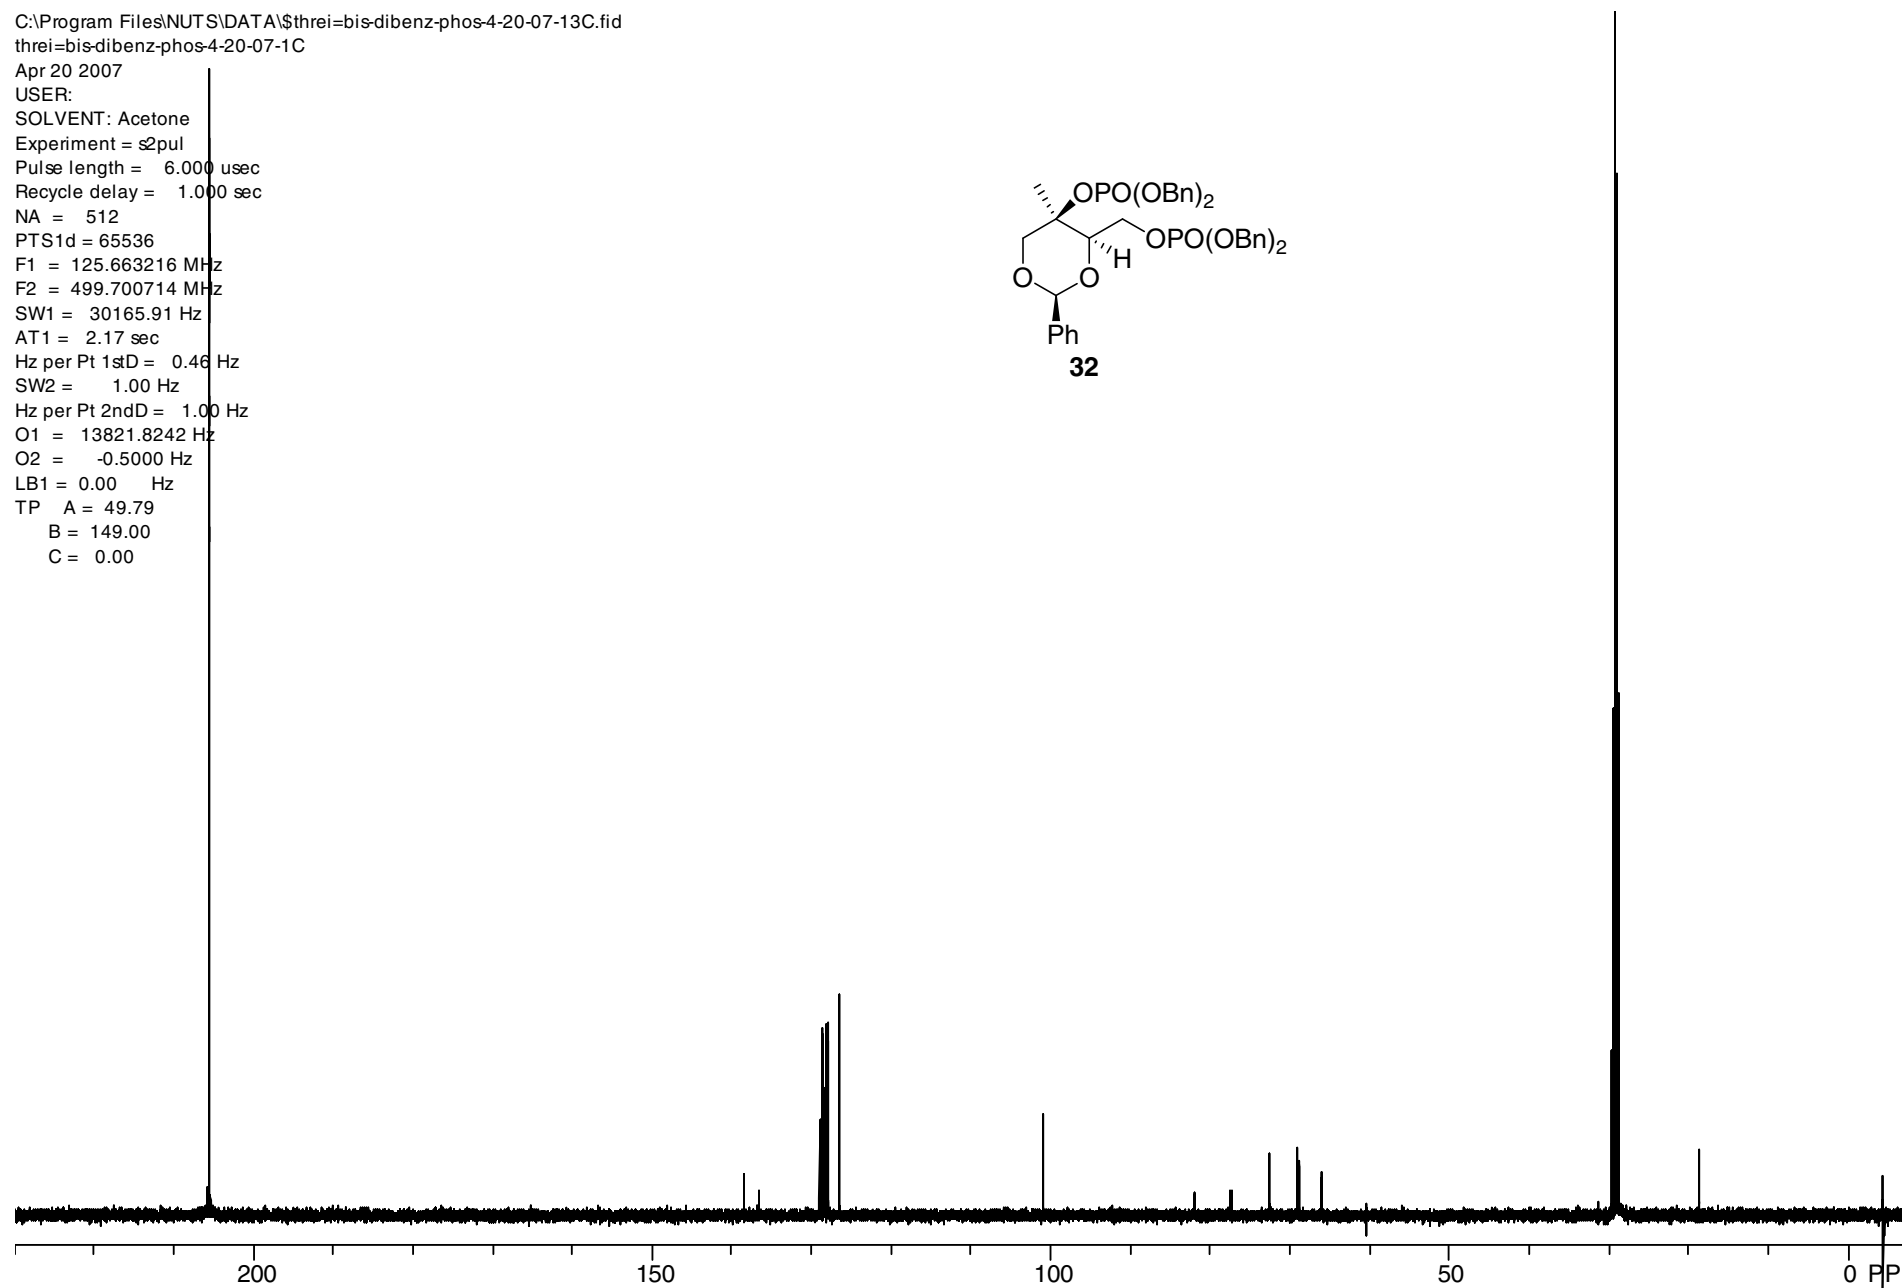

S53

C:\Program Files\NUTS\DATA\\$threi=bis-dibenz-phos-4-20-07-31P.fid

P31 TRIPHENYLPHOSPHATE PARAMETERS

Apr 20 2007

USER:

SOLVENT: Acetone

Experiment = s2pul

Pulse length = 3.875 usec

Recycle delay = 1.000 sec

PTS1d = 65536

F1 = 202.285278 MHz

F2 = 499.700714 MHz

SW1 = 50000.00 Hz

AT1 = 1.31 sec

Hz per Pt 1stD = 0.76 Hz

SW2 = 1.00 Hz

Hz per Pt 2ndD = 1.00 Hz

O1 = 3622.5039 Hz

O2 = -0.5000 Hz

LB1 = 0.00 Hz

TP A = -95.86

B = 61.17

C = 0.00

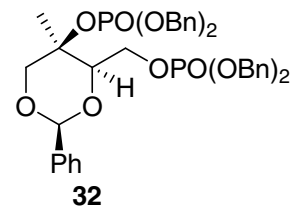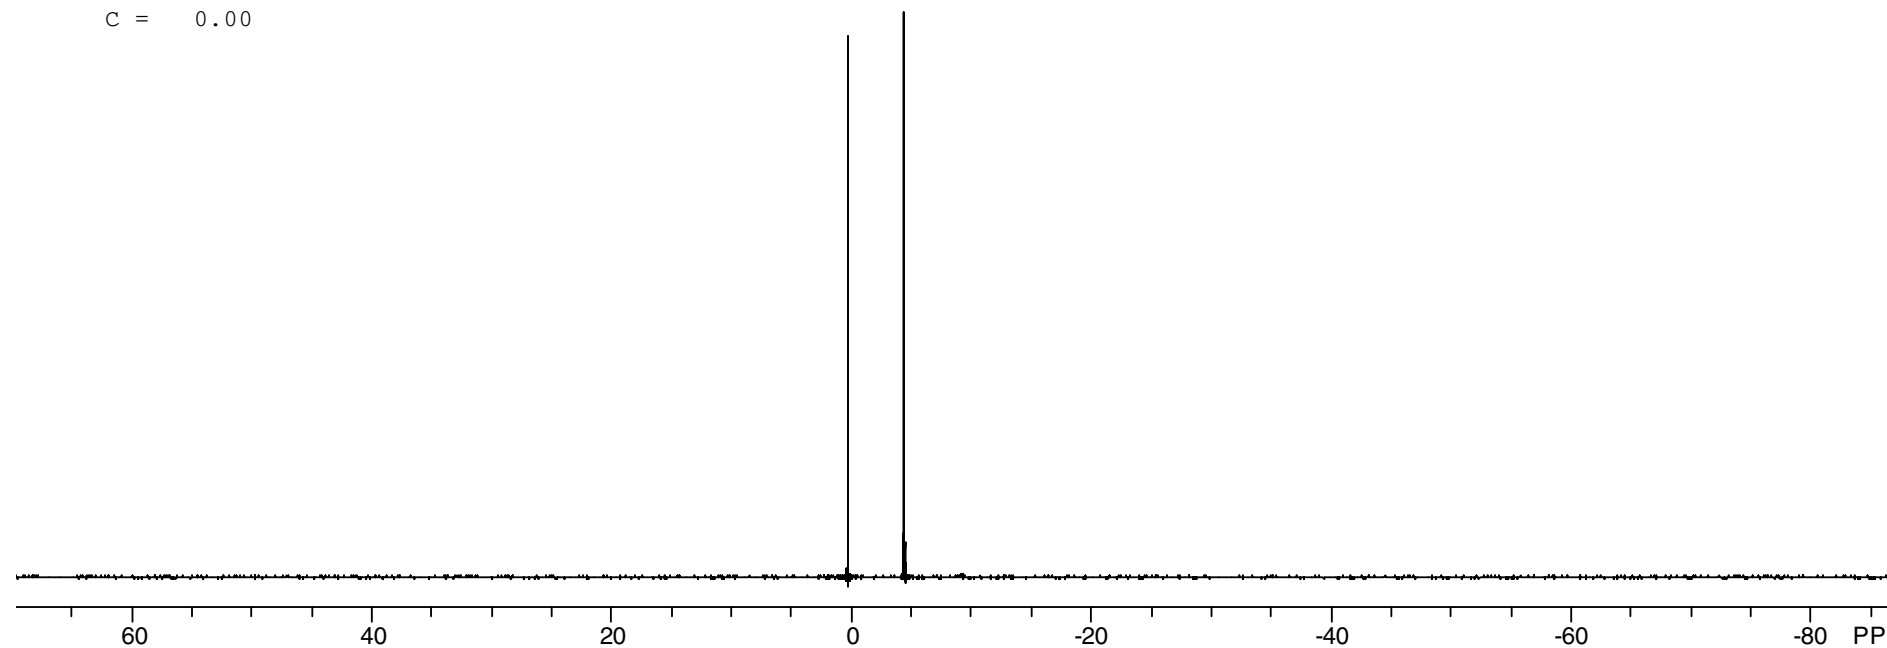

C:\Program Files\NUTS\DATA\OBz-TBS-1-OH-9-10-06-1H.fid

OBz-TBS-1-OH-9-10-06-1H

Sep 10 2006

USER:

SOLVENT: CDCl<sub>3</sub>

Experiment = s2pul

Pulse length = 6.500 usec

Recycle delay = 0.000 sec

NA = 59

PTS1d = 65536

F1 = 499.698944 MHz

F2 = 499.698944 MHz

SW1 = 7024.94 Hz

AT1 = 9.33 sec

Hz per Pt 1stD = 0.11 Hz

SW2 = 1.00 Hz

Hz per Pt 2ndD = 1.00 Hz

O1 = 2496.2346 Hz

O2 = -0.5000 Hz

LB1 = 0.00 Hz

TP A = -71.66

B = -1.00

C = 0.00

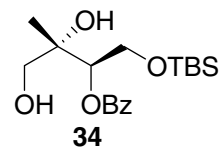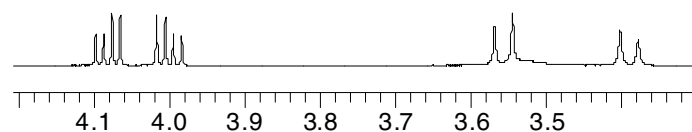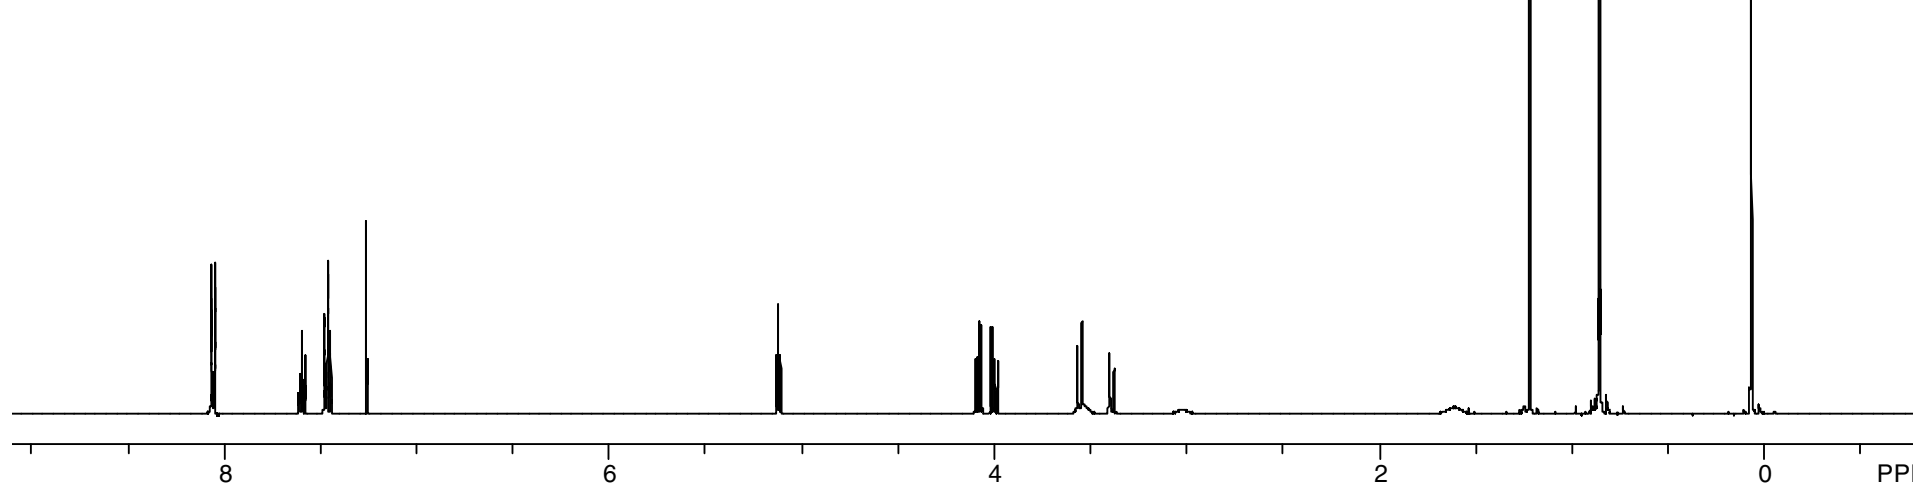

CHN Program Files\NUTS\DATA\OBz-2nd-OH-TBS-9-12-06-1H.fid

OBz-2nd-OH-TBS-9-12-06-1H

Sep 12 2006

USER:

SOLVENT: CDCl3

Experiment = s2pul

Pulse length = 6.500 usec

Recycle delay = 0.000 sec

NA = 31

PTS1d = 65536

F1 = 499.698944 MHz

F2 = 499.698944 MHz

SW1 = 7024.94 Hz

AT1 = 9.33 sec

Hz per Pt 1stD = 0.11 Hz

SW2 = 1.00 Hz

Hz per Pt 2ndD = 1.00 Hz

O1 = 2496.1350 Hz

O2 = -0.5000 Hz

LB1 = 0.00 Hz

TP A = -109.93

B = 9.00

C = 0.00

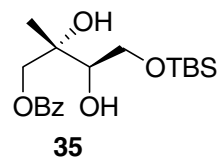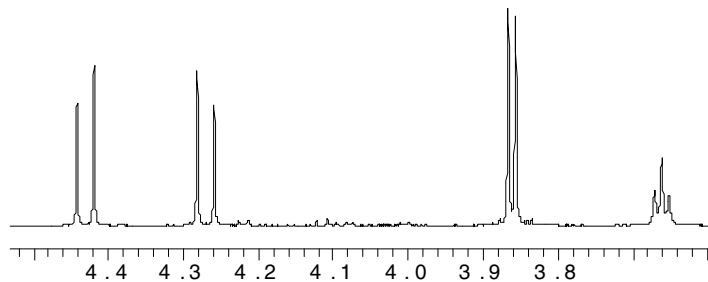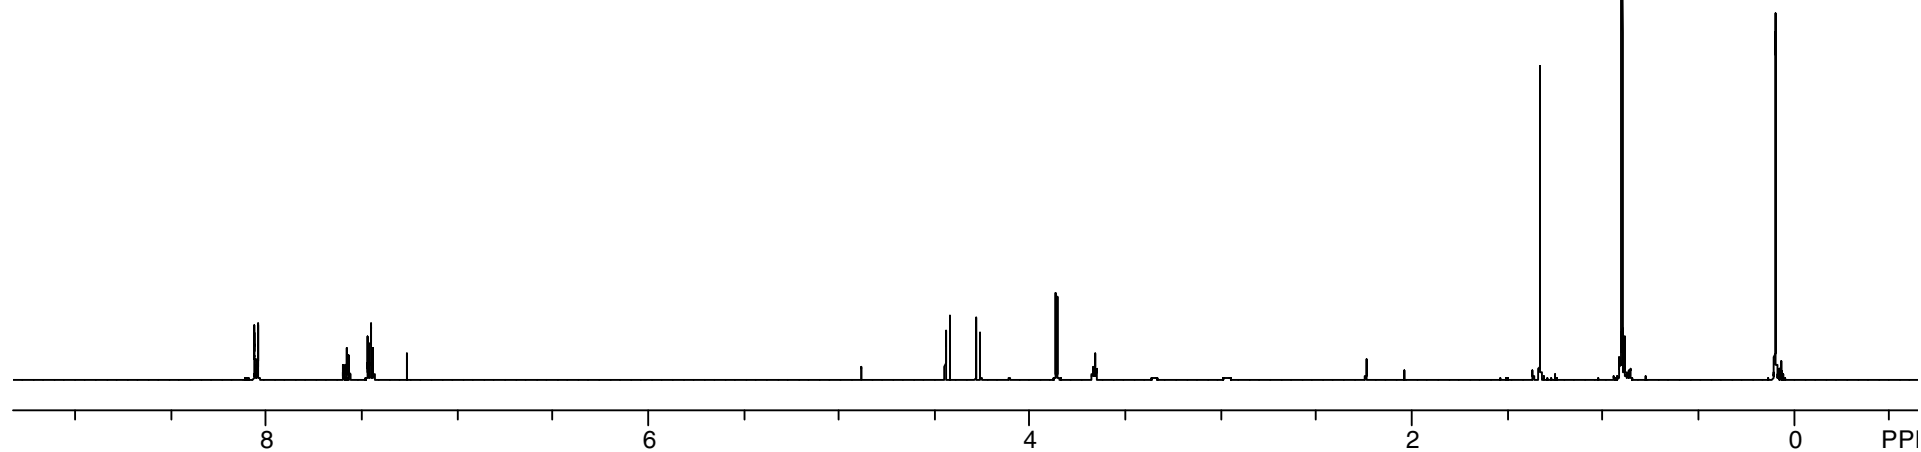



C:\Program Files\NUTS\DATA\OBz-2nd-OH-TBs-9-12-06-13C.fid

OBz-2nd-OH-9-12-06-13C

Sep 12 2006

USER:

SOLVENT: CDCl<sub>3</sub>

Experiment = s2pul

Pulse length = 3.325 usec

Recycle delay = 1.000 sec

NA = 290

PTS1d = 65536

F1 = 125.662560 MHz

F2 = 499.698120 MHz

SW1 = 30165.91 Hz

AT1 = 2.17 sec

Hz per Pt 1stD = 0.46 Hz

SW2 = 1.00 Hz

Hz per Pt 2ndD = 1.00 Hz

O1 = 13821.7402 Hz

O2 = -0.5000 Hz

LB1 = 0.00 Hz

TP A = 68.05

B = 127.00

C = 0.00

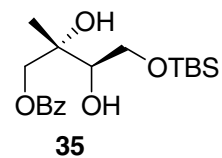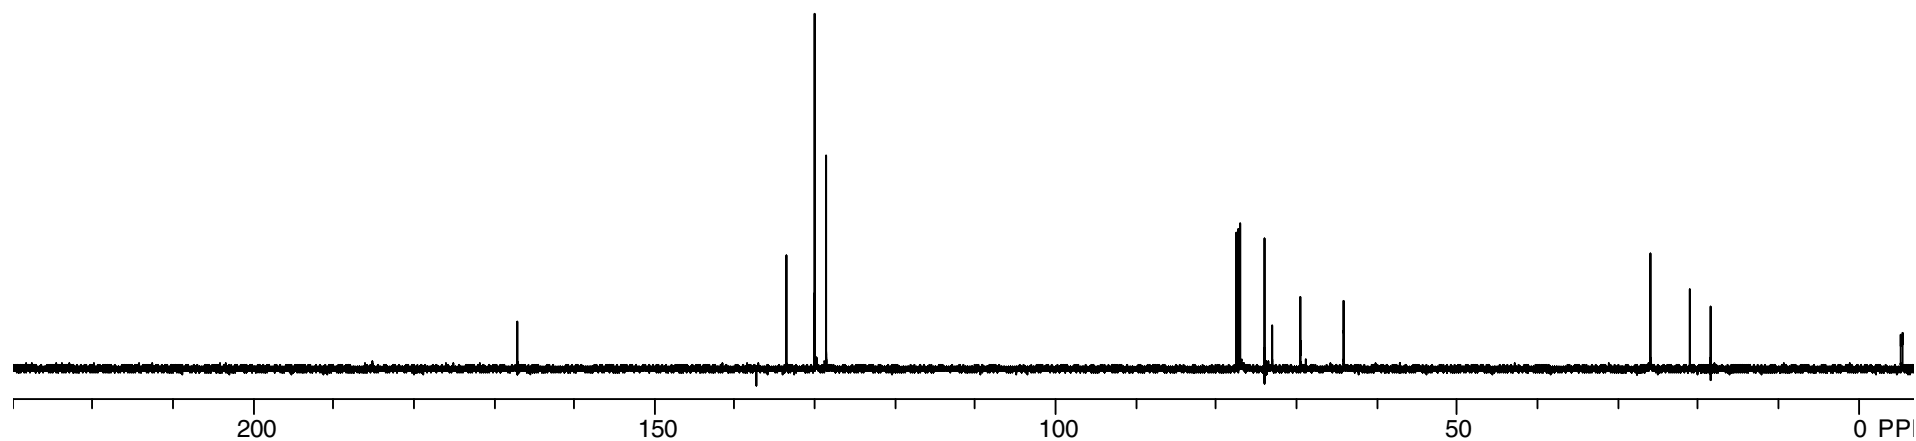

S57

C:\Program Files\NUTS\DATA\OBz-OTs-TBS-9-12-06-1H.fid

OBz-OTs-TBS-9-12-06-1H

Sep 12 2006

USER:

SOLVENT: CDCl<sub>3</sub>

Experiment = s2pul

Pulse length = 6.500 usec

Recycle delay = 0.000 sec

NA = 16

PTS1d = 65536

F1 = 499.698944 MHz

F2 = 499.698944 MHz

SW1 = 7024.94 Hz

AT1 = 9.33 sec

Hz per Pt 1stD = 0.11 Hz

SW2 = 1.00 Hz

Hz per Pt 2ndD = 1.00 Hz

O1 = 2495.9207 Hz

O2 = -0.5000 Hz

LB1 = 0.00 Hz

TP A = 257.45

B = 15.00

C = 0.00

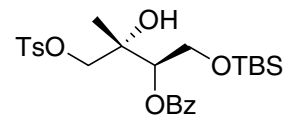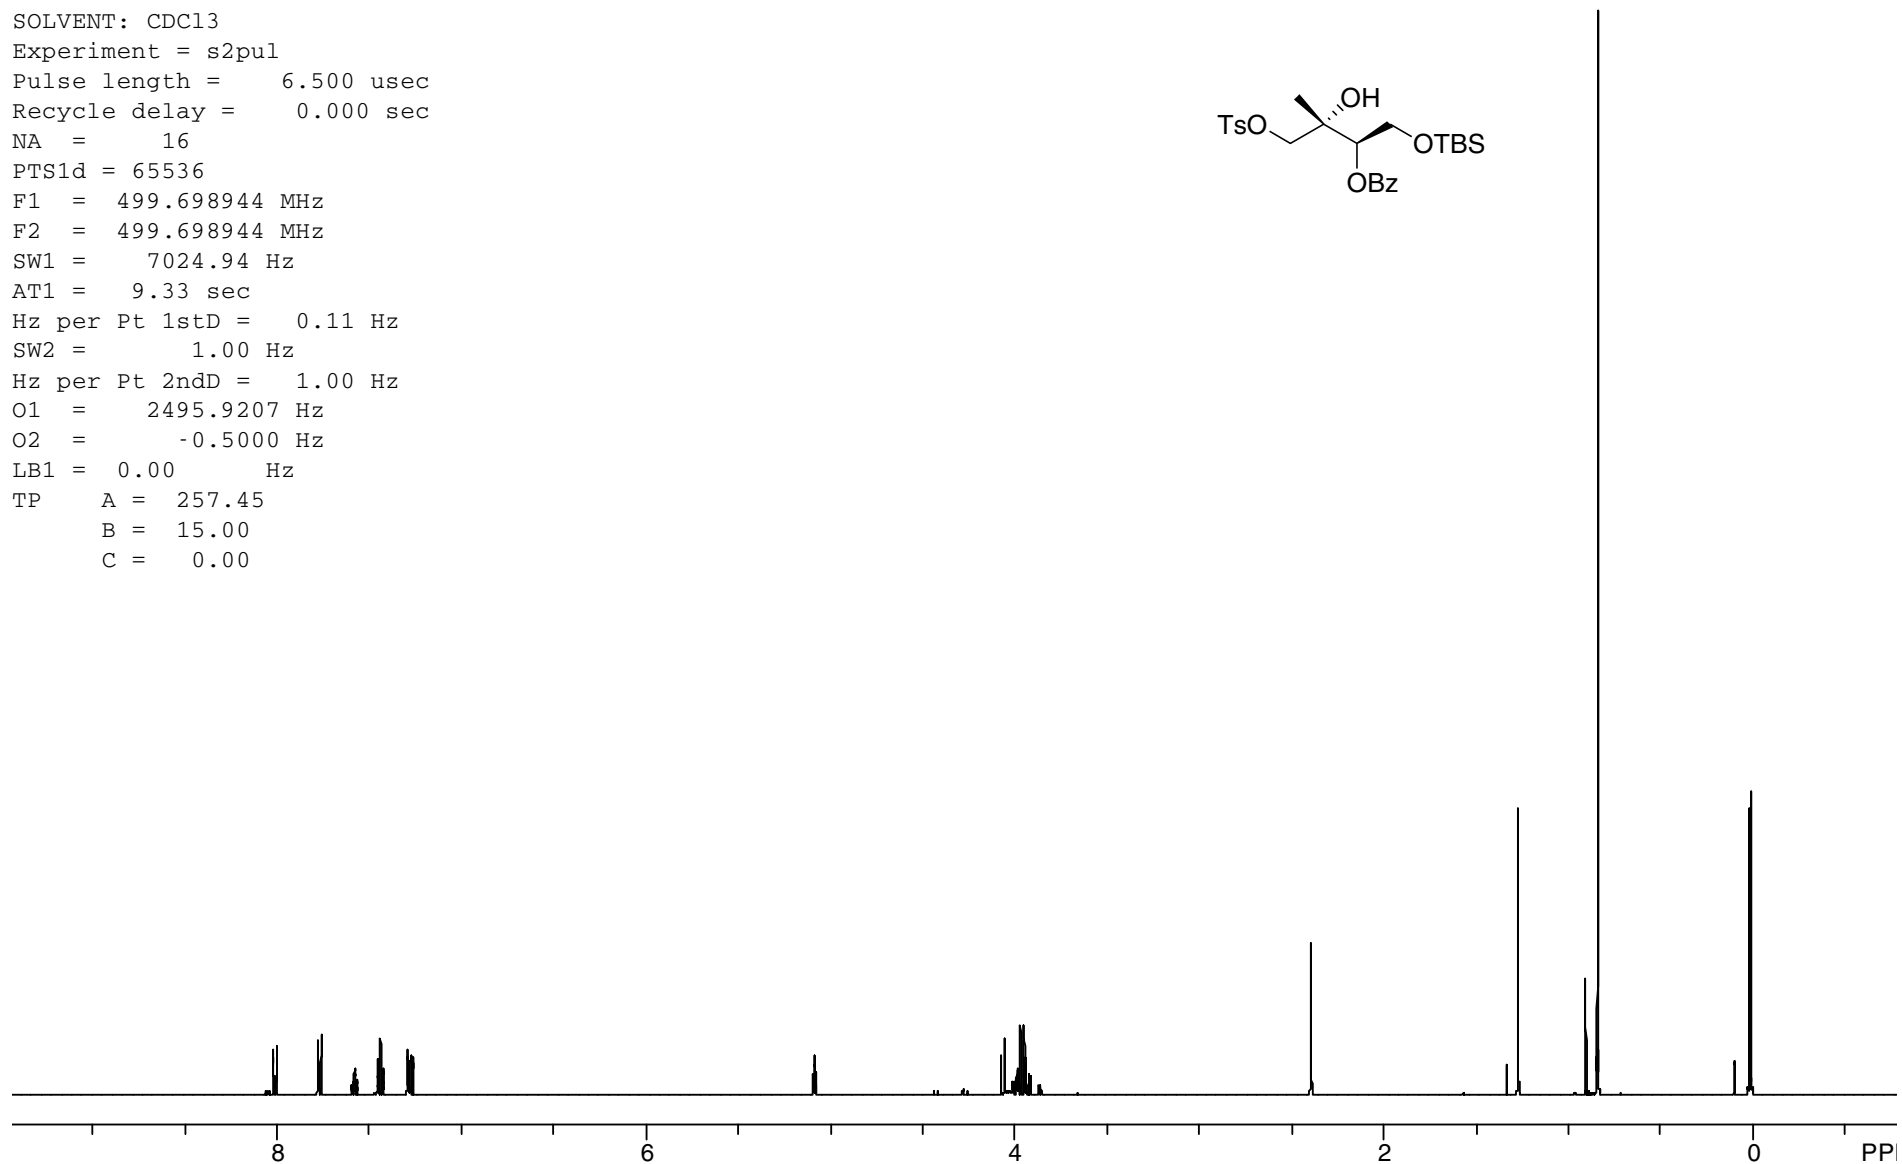

C:\Program Files\NUTS\DATA\OBz-OTs-TBS-9-12-06-13C.fid

OBz-OTs-TBS-9-12-06-13C

Sep 12 2006

USER:

SOLVENT: CDCl3

Experiment = s2pul

Pulse length = 3.325 usec

Recycle delay = 1.000 sec

NA = 201

PTS1d = 65536

F1 = 125.662560 MHz

F2 = 499.698120 MHz

SW1 = 30165.91 Hz

AT1 = 2.17 sec

Hz per Pt 1stD = 0.46 Hz

SW2 = 1.00 Hz

Hz per Pt 2ndD = 1.00 Hz

O1 = 13821.7402 Hz

O2 = -0.5000 Hz

LB1 = 0.00 Hz

TP A = 142.48

B = 53.00

C = 0.00

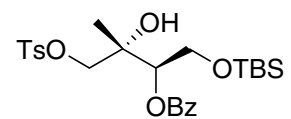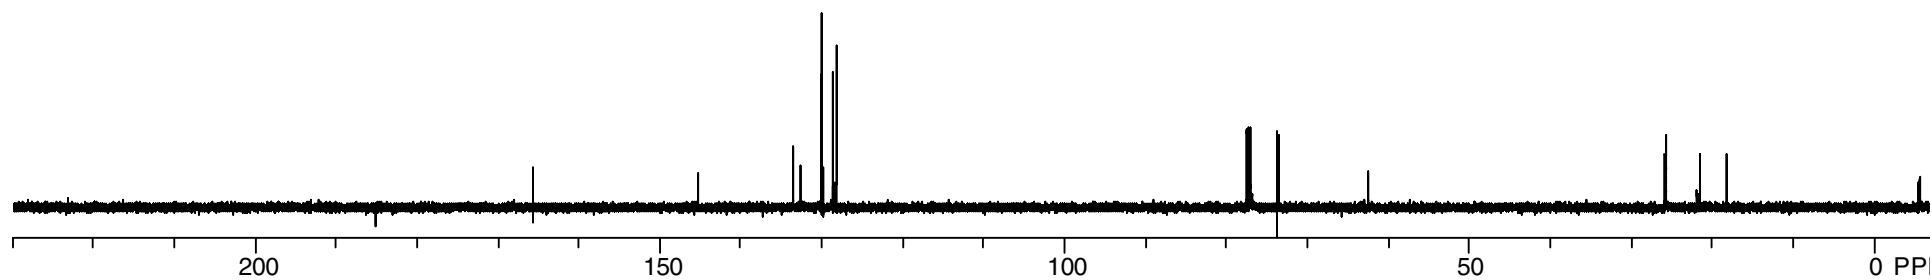

OBz-N3-TBS-9-14-06-1H.fid

OBz-N3-TBS-9-14-06-1H

Sep 14 2006

USER:

SOLVENT: CDCl3

Experiment = s2pul

Pulse length = 6.500 usec

Recycle delay = 0.000 sec

NA = 32

PTS1d = 65536

F1 = 499.698944 MHz

F2 = 499.698944 MHz

SW1 = 7024.94 Hz

AT1 = 9.33 sec

Hz per Pt 1stD = 0.11 Hz

SW2 = 1.00 Hz

Hz per Pt 2ndD = 1.00 Hz

O1 = 2496.0322 Hz

O2 = -0.5000 Hz

LB1 = 0.00 Hz

TP A = 270.58

B = 29.00

C = 0.00

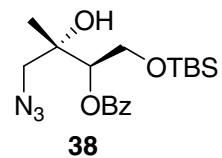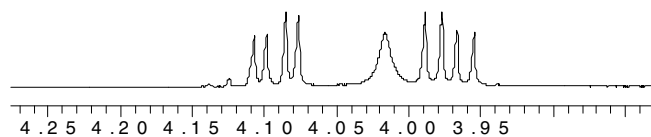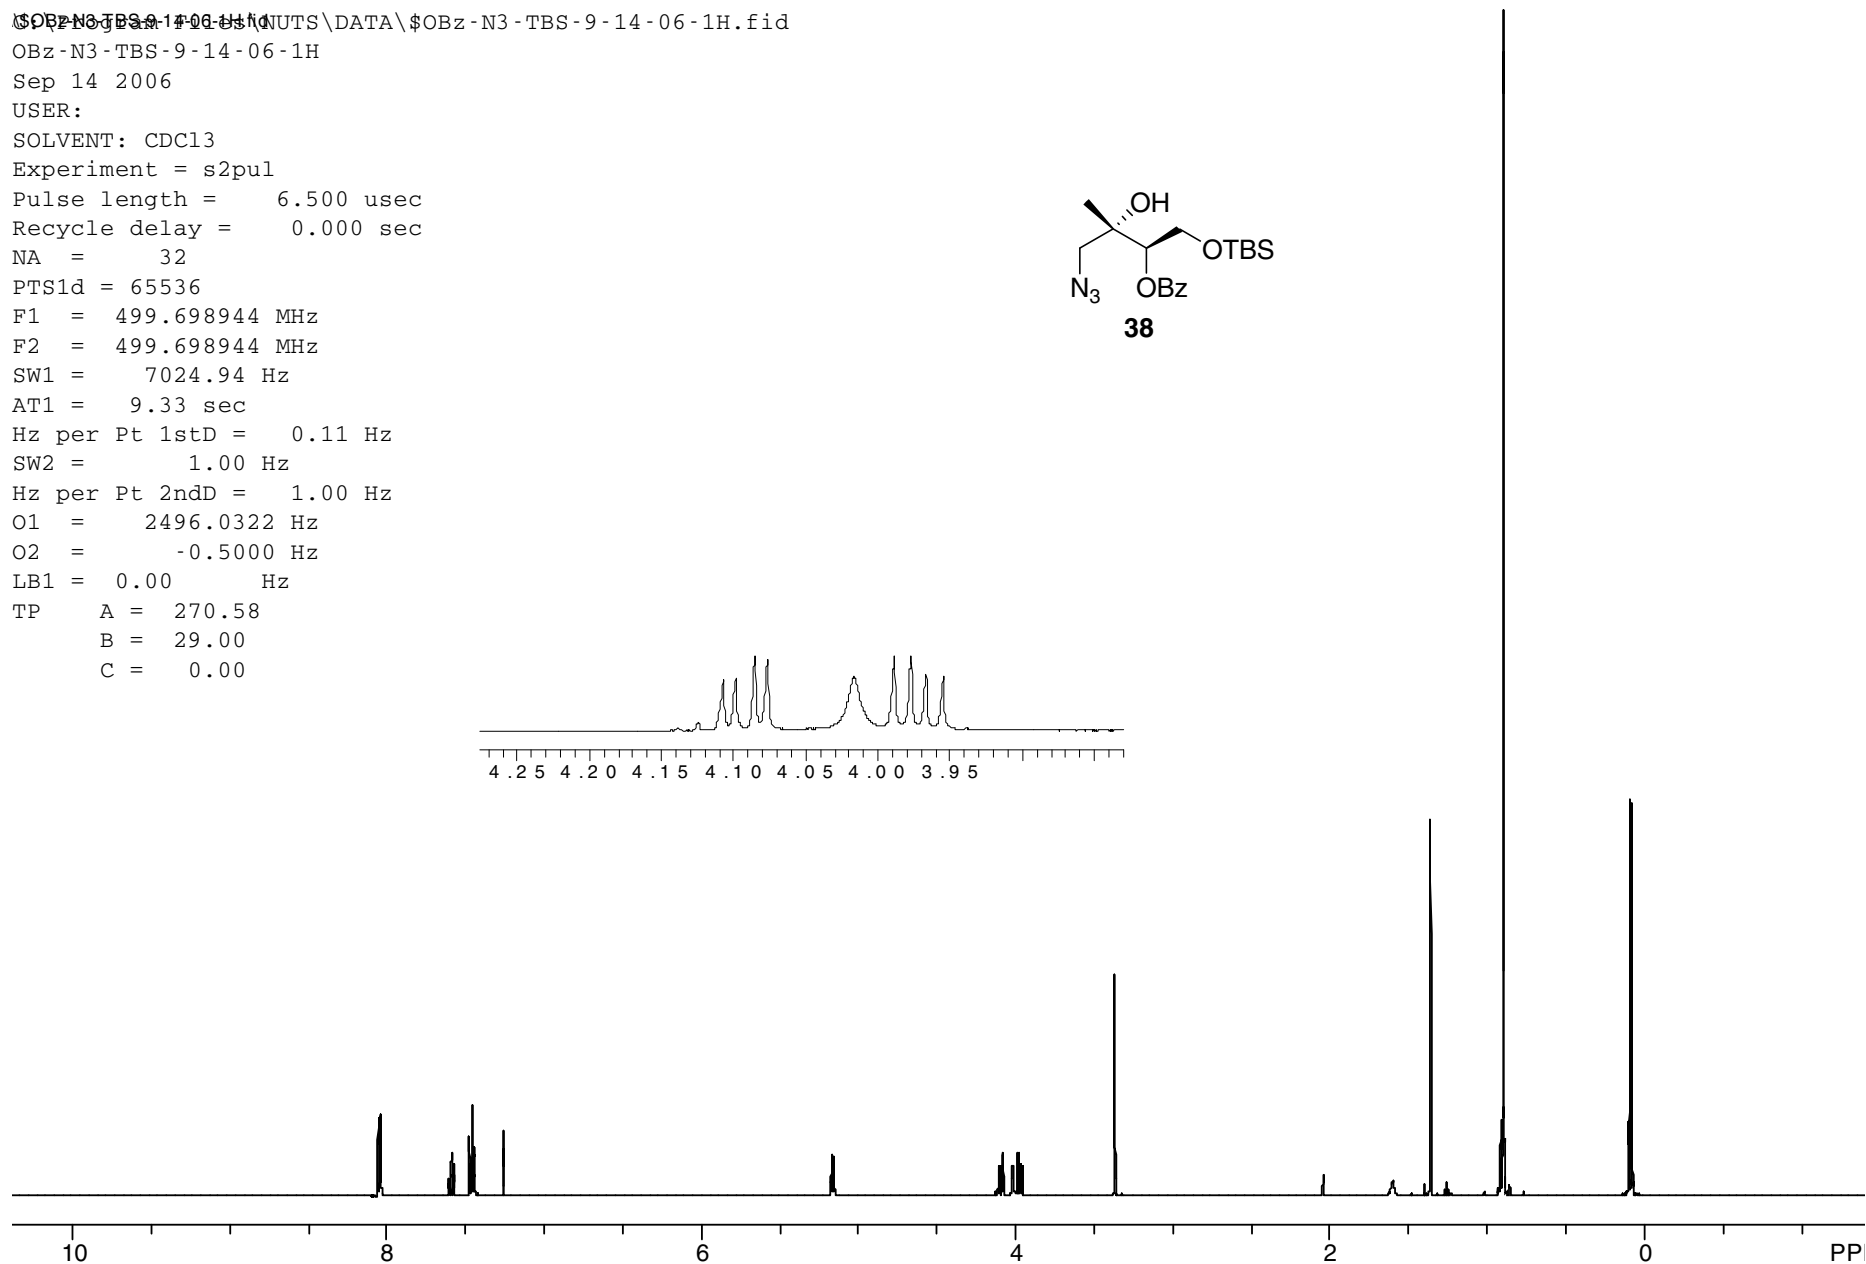

C:\Program Files\NUTS\DATA\OBz-N3-TBS-9-14-06-13C.fid

OBz-N3-TBS-9-14-06-13C

Sep 14 2006

USER:

SOLVENT: CDCl<sub>3</sub>

Experiment = s2pul

Pulse length = 3.325 usec

Recycle delay = 1.000 sec

NA = 198

PTS1d = 65536

F1 = 125.662560 MHz

F2 = 499.698120 MHz

SW1 = 30165.91 Hz

AT1 = 2.17 sec

Hz per Pt 1stD = 0.46 Hz

SW2 = 1.00 Hz

Hz per Pt 2ndD = 1.00 Hz

O1 = 13821.7402 Hz

O2 = -0.5000 Hz

LB1 = 0.00 Hz

TP A = 139.33

B = 64.00

C = 0.00

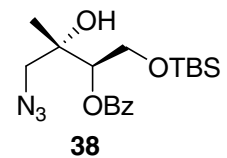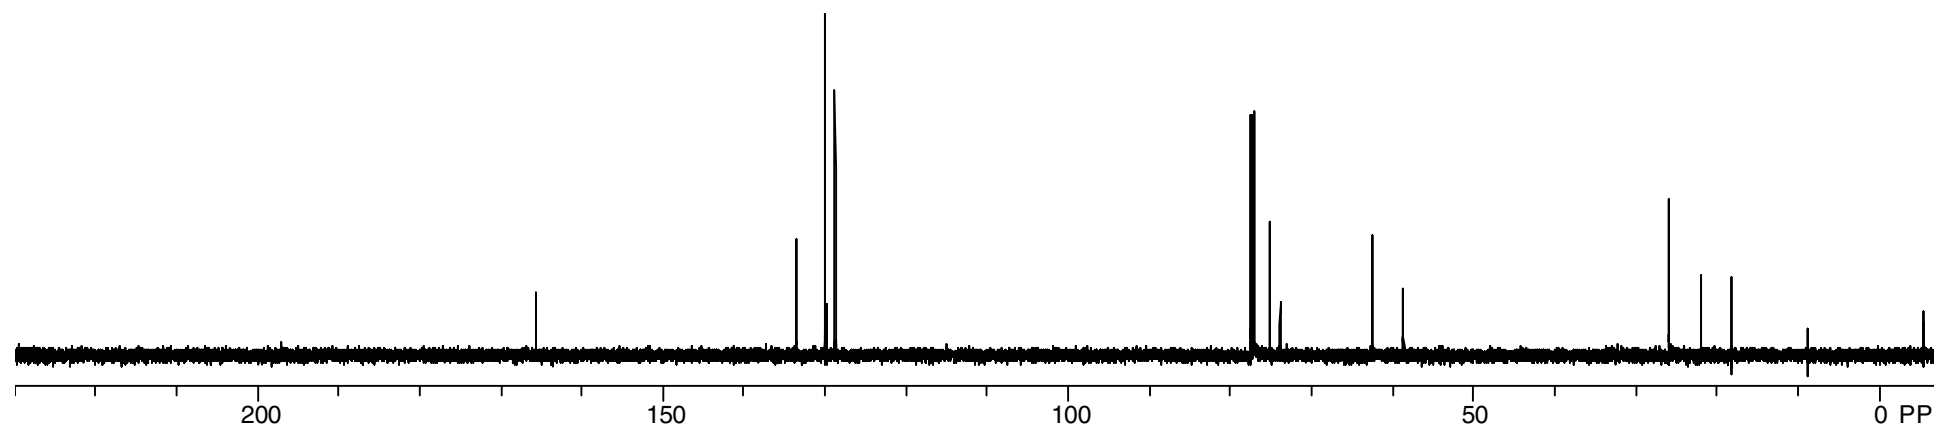

S61

04\Program Files\NUTS\DATA\OBz-N3-diol-9-14-06-1H.fid

OBz-N3-diol-9-14-06-1H

Sep 15 2006

USER:

SOLVENT: CDC13

Experiment = s2pul

Pulse length = 6.500 usec

Recycle delay = 0.000 sec

NA = 28

PTS1d = 65536

F1 = 499.698944 MHz

F2 = 499.698944 MHz

SW1 = 7024.94 Hz

AT1 = 9.33 sec

Hz per Pt 1stD = 0.11 Hz

SW2 = 1.00 Hz

Hz per Pt 2ndD = 1.00 Hz

O1 = 2496.0322 Hz

O2 = -0.5000 Hz

LB1 = 0.00 Hz

TP A = -66.57

B = 2.00

C = 0.00

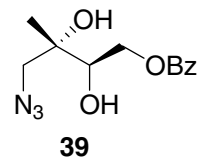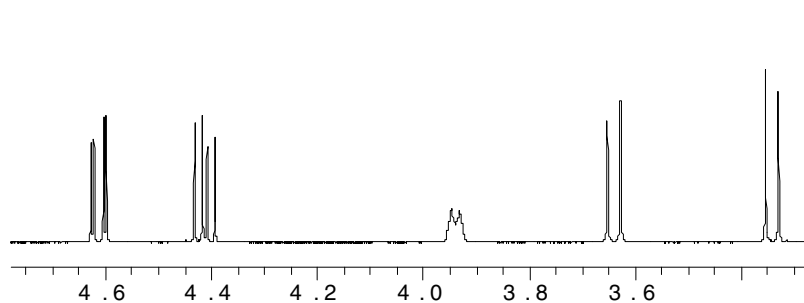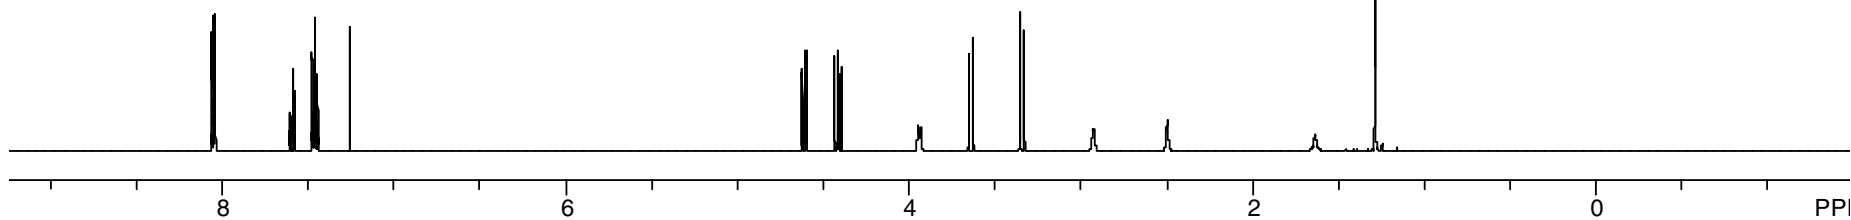

C:\Program Files\NUTS\DATA\Obz-N3-diol-9-14-06-13C.fid

Obz-N3-diol-9-14-06-13C

Sep 15 2006

USER:

SOLVENT: CDCl<sub>3</sub>

Experiment = s2pul

Pulse length = 3.325 usec

Recycle delay = 1.000 sec

NA = 451

PTS1d = 65536

F1 = 125.662560 MHz

F2 = 499.698120 MHz

SW1 = 30165.91 Hz

AT1 = 2.17 sec

Hz per Pt 1stD = 0.46 Hz

SW2 = 1.00 Hz

Hz per Pt 2ndD = 1.00 Hz

O1 = 13821.7402 Hz

O2 = -0.5000 Hz

LB1 = 0.00 Hz

TP A = 143.24

B = 69.00

C = 0.00

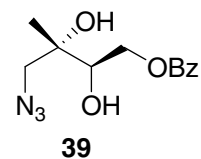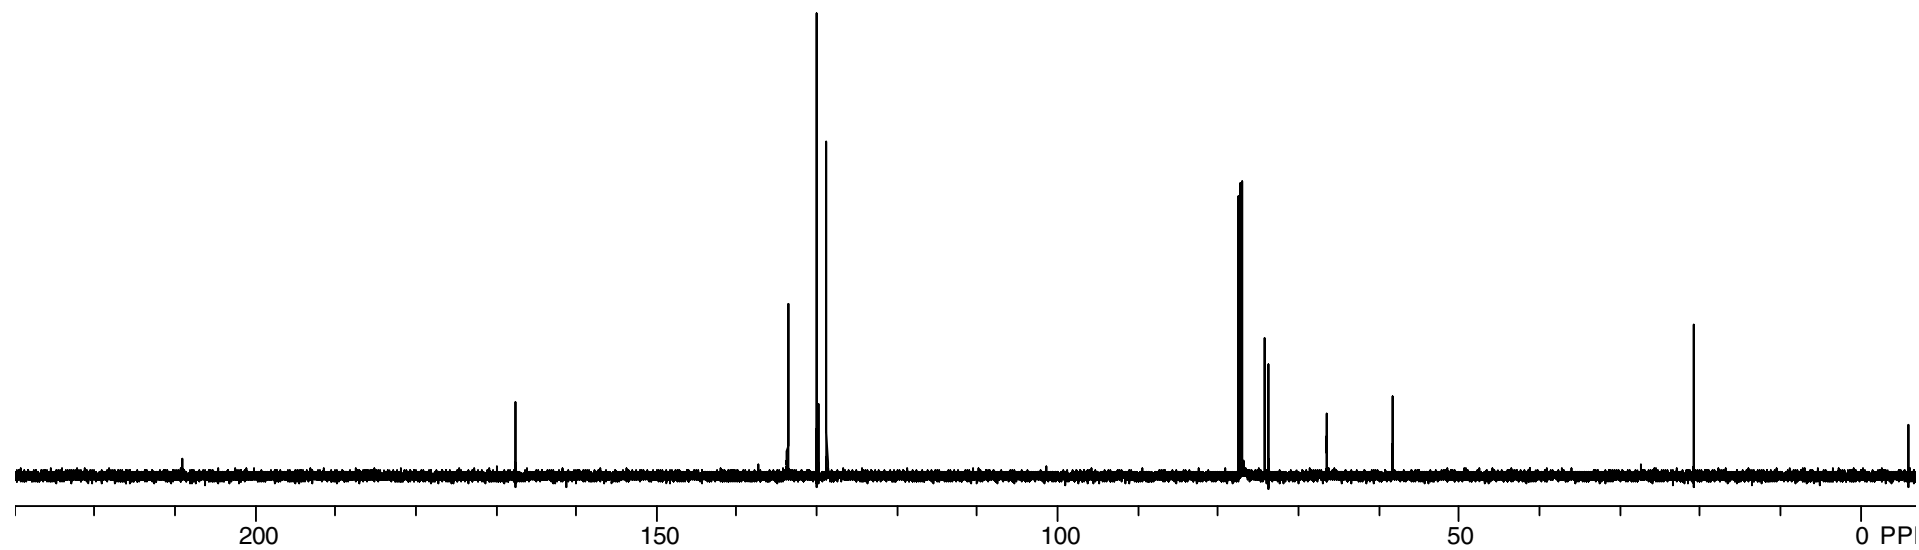

C:\Program Files\NUTS\DATA\N3-triol-9-17-06-1H.fid

N3-triol-9-17-06-1H

Sep 17 2006

USER:

SOLVENT: CDCl3

Experiment = s2pul

Pulse length = 5.825 usec

Recycle delay = 0.000 sec

NA = 88

PTS1d = 65536

F1 = 399.950684 MHz

F2 = 399.951111 MHz

SW1 = 8000.00 Hz

AT1 = 8.19 sec

Hz per Pt 1stD = 0.12 Hz

SW2 = 1.00 Hz

Hz per Pt 2ndD = 1.00 Hz

O1 = 2000.4019 Hz

O2 = -0.5000 Hz

LB1 = 0.00 Hz

TP A = 37.84

B = 65.00

C = 0.00

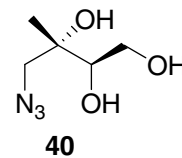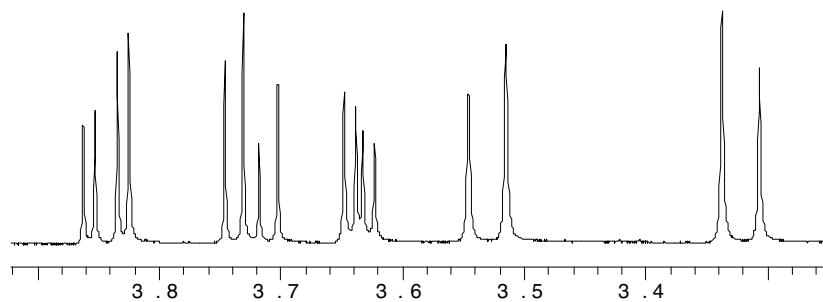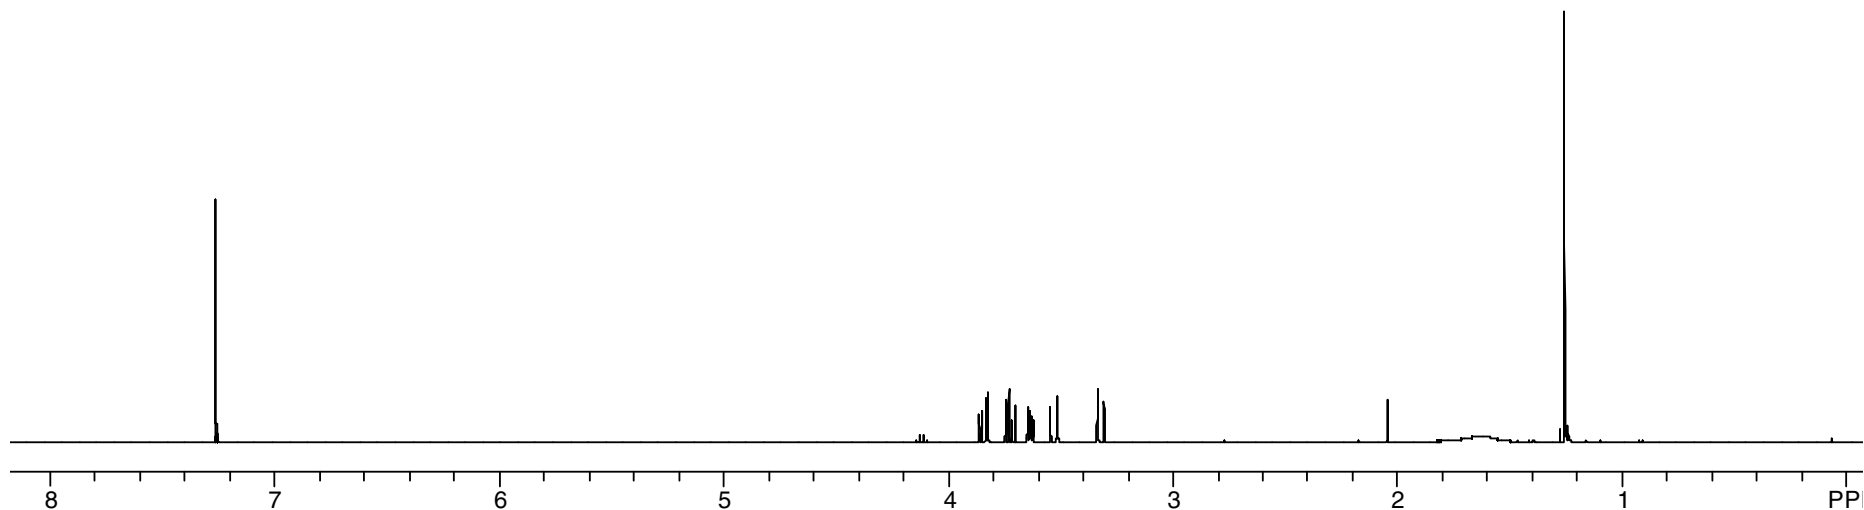



C:\Program Files\NUTS\DATA\N3-triol-9-17-06-13C.fid

N3-triol-9-17-06-13C

Sep 17 2006

USER:

SOLVENT: CDCl<sub>3</sub>

Experiment = s2pul

Pulse length = 3.325 usec

Recycle delay = 1.000 sec

NA = 1000

PTS1d = 65536

F1 = 125.662560 MHz

F2 = 499.698120 MHz

SW1 = 30165.91 Hz

AT1 = 2.17 sec

Hz per Pt 1stD = 0.46 Hz

SW2 = 1.00 Hz

Hz per Pt 2ndD = 1.00 Hz

O1 = 13821.7402 Hz

O2 = -0.5000 Hz

LB1 = 0.00 Hz

TP A = -7.98

B = 268.00

C = 0.00

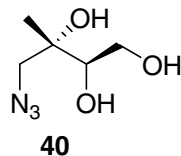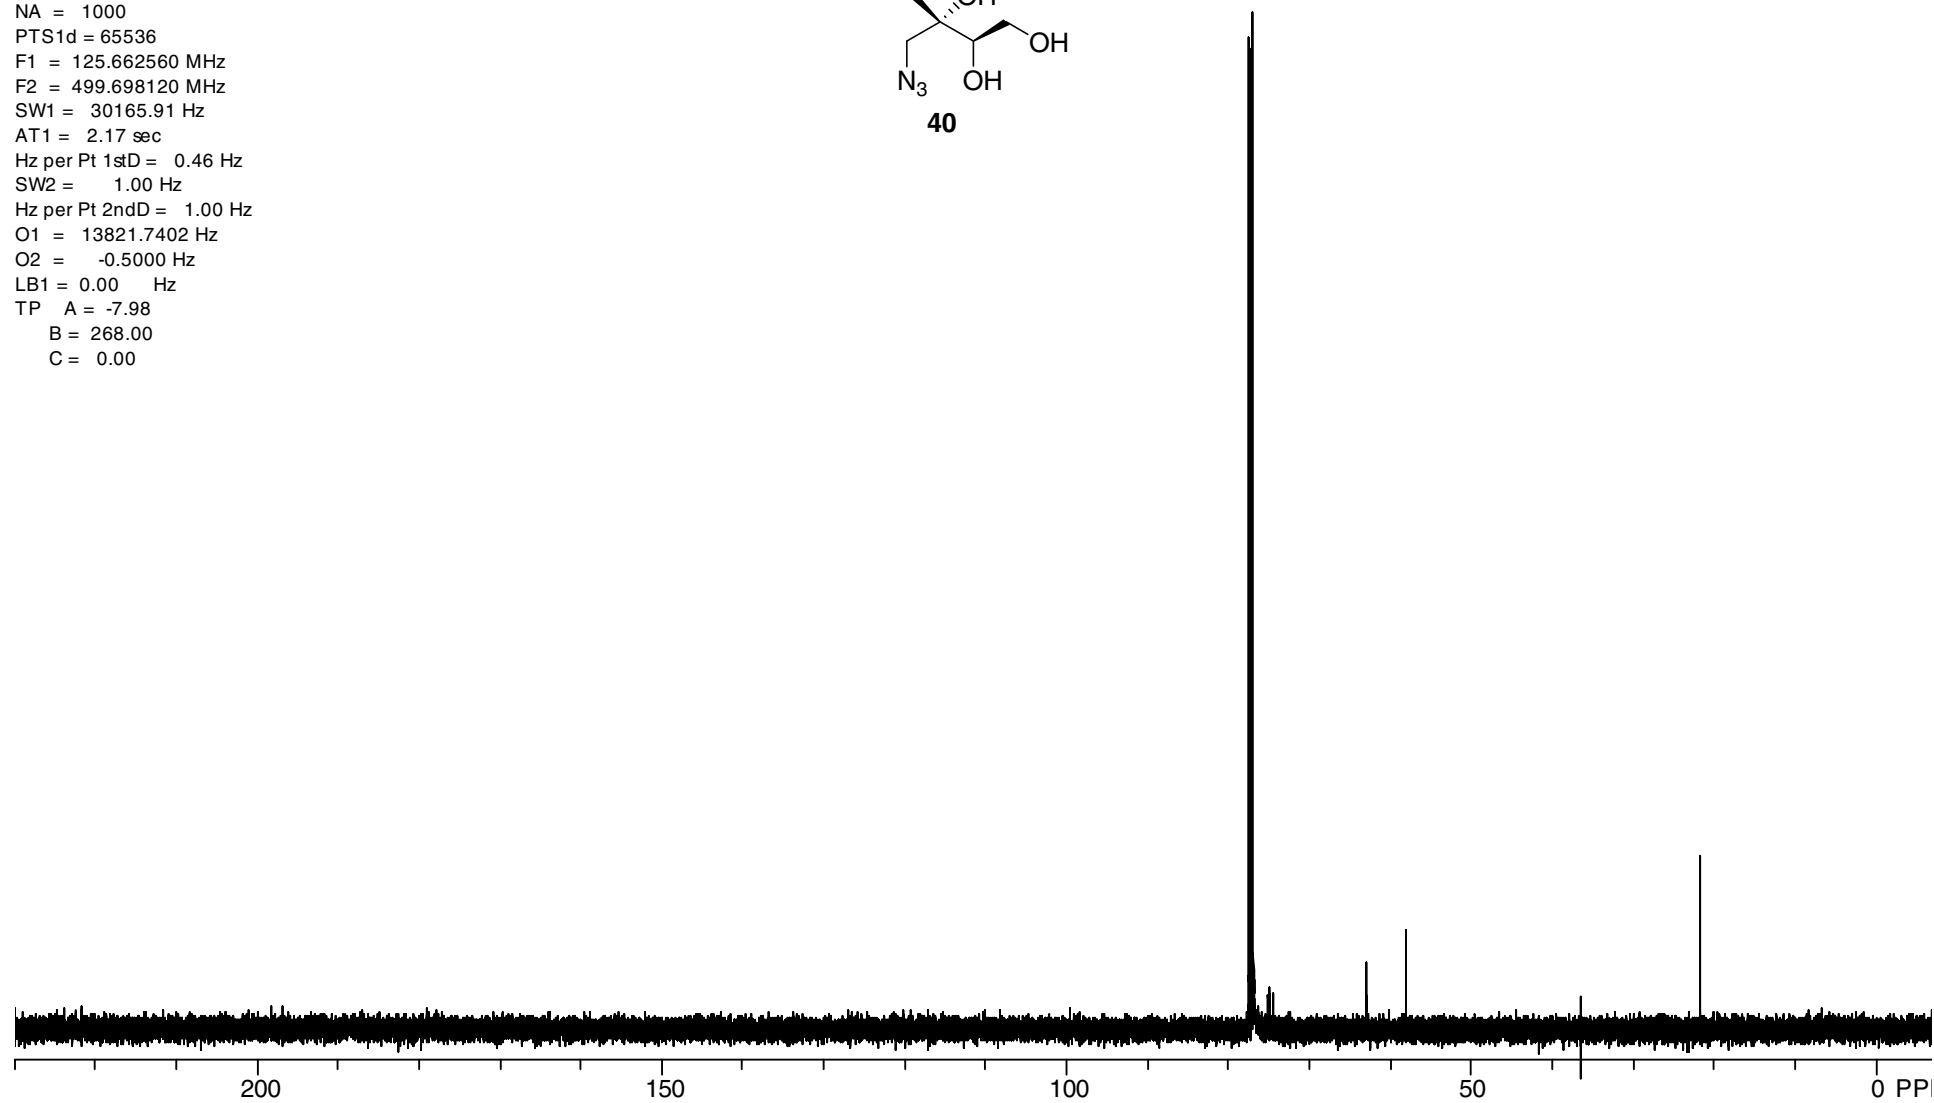

S65

C:\Program Files\NUTS\DATA\\$amino-triol-5-28-05-1H.fid

amino-triol-5-28-05-1H

Sep 28 2005

USER:

SOLVENT: D2O

Experiment = s2pul

Pulse length = 7.350 usec

Recycle delay = 0.000 sec

NA = 44

PTS1d = 65536

F1 = 399.951721 MHz

F2 = 399.952118 MHz

SW1 = 8000.00 Hz

AT1 = 8.19 sec

Hz per Pt 1stD = 0.12 Hz

SW2 = 1.00 Hz

Hz per Pt 2ndD = 1.00 Hz

O1 = 2057.9751 Hz

O2 = -0.5000 Hz

LB1 = 0.00 Hz

TP A = 94.86

B = 8.00

C = 0.00

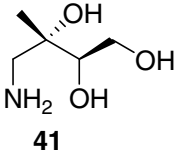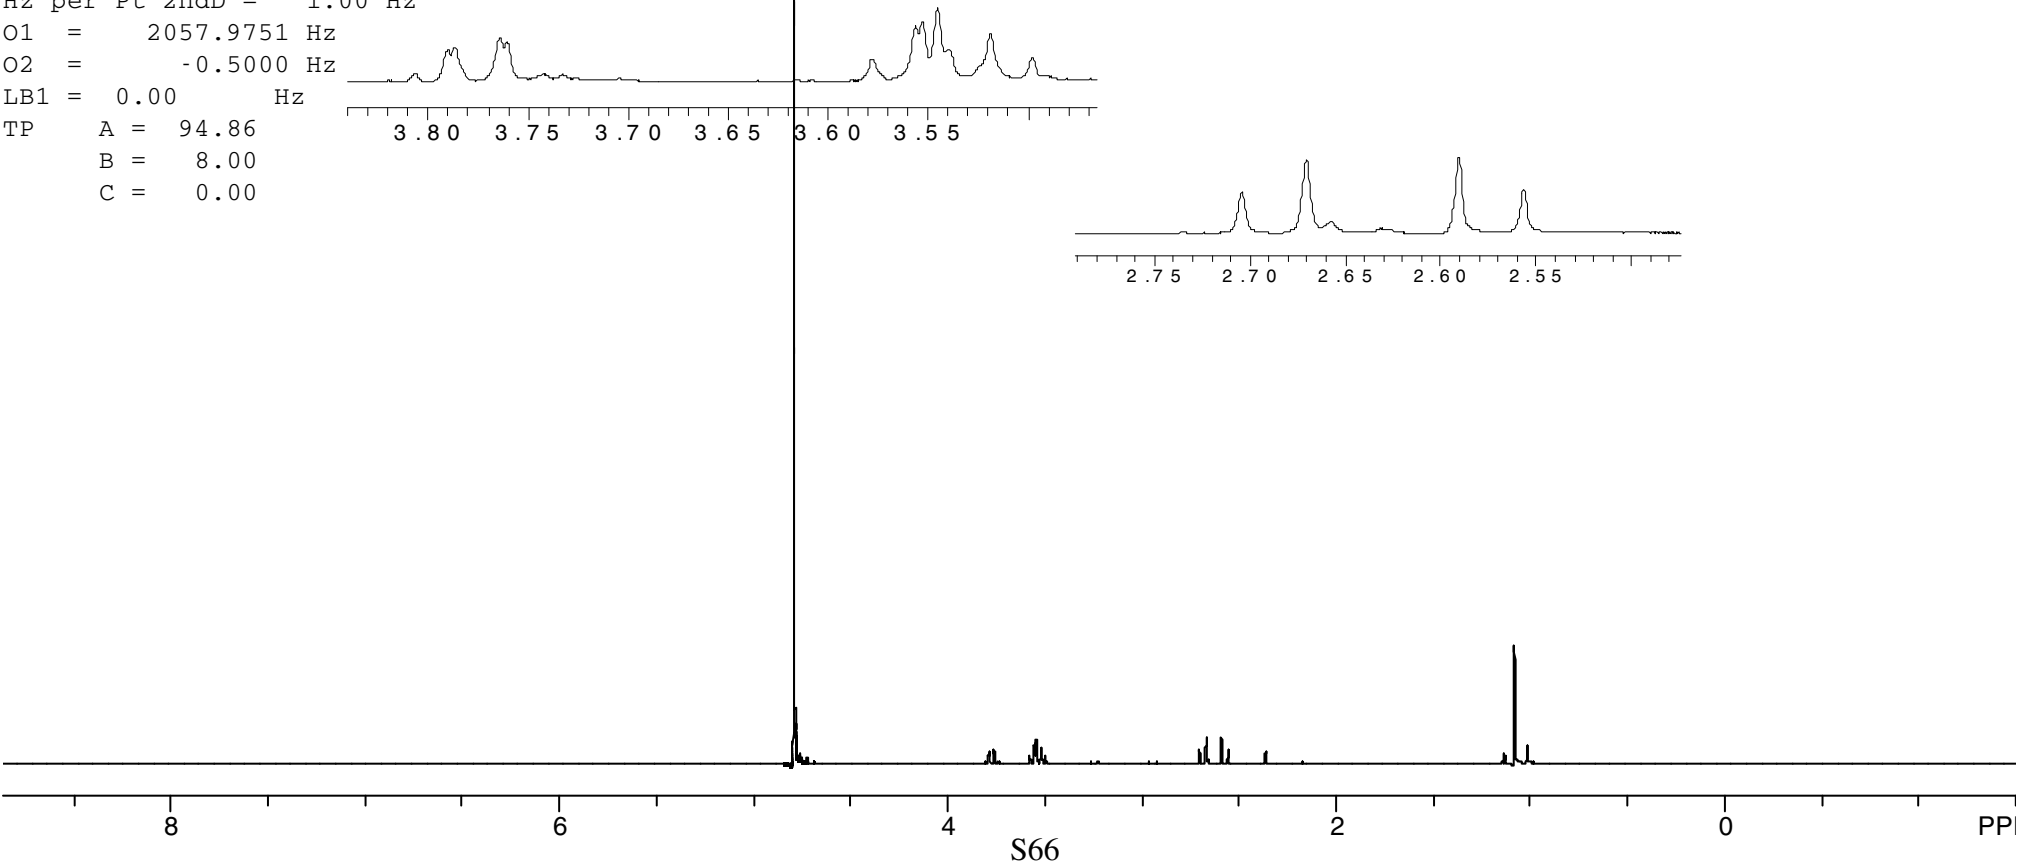

Supplement: Supplementary file 1 [file 4666429]
